# Supplementary material for: Design and development of the Pediatric Urology Recovery After Surgery Endeavor (PURSUE) multicentre pilot and exploratory study
Source: PubMed Central journal article supplement — BMJ Open. 2020 Nov 23;10(11):e039035. doi: 10.1136/bmjopen-2020-039035 (PMC7684811; doi:10.1136/bmjopen-2020-039035), 2020-11-23
Supplement: bmjopen-2020-039035.draft_revisions.pdf [file bmjopen-2020-039035.draft_revisions.pdf]

# BMJ Open

BMJ Open is committed to open peer review. As part of this commitment we make the peer review history of every article we publish publicly available.

When an article is published we post the peer reviewers' comments and the authors' responses online. We also post the versions of the paper that were used during peer review. These are the versions that the peer review comments apply to.

The versions of the paper that follow are the versions that were submitted during the peer review process. They are not the versions of record or the final published versions. They should not be cited or distributed as the published version of this manuscript.

BMJ Open is an open access journal and the full, final, typeset and author-corrected version of record of the manuscript is available on our site with no access controls, subscription charges or pay-per-view fees (<http://bmjopen.bmj.com>).

If you have any questions on BMJ Open's open peer review process please email [info.bmjopen@bmj.com](mailto:info.bmjopen@bmj.com)

# BMJ Open

## Design and Development of the Pediatric Urology Recovery After Surgery Endeavor (PURSUE) Multi-Center Pilot and Exploratory Study

|                               |                                                                                                                                                                                                                                                                                                                                                                                                                                                                                                                                                                                                                                                                                                                                                                                                                                                                                                                                                                                                                                                                                                                                                                                                                                                                                                                                                     |
|-------------------------------|-----------------------------------------------------------------------------------------------------------------------------------------------------------------------------------------------------------------------------------------------------------------------------------------------------------------------------------------------------------------------------------------------------------------------------------------------------------------------------------------------------------------------------------------------------------------------------------------------------------------------------------------------------------------------------------------------------------------------------------------------------------------------------------------------------------------------------------------------------------------------------------------------------------------------------------------------------------------------------------------------------------------------------------------------------------------------------------------------------------------------------------------------------------------------------------------------------------------------------------------------------------------------------------------------------------------------------------------------------|
| Journal:                      | <i>BMJ Open</i>                                                                                                                                                                                                                                                                                                                                                                                                                                                                                                                                                                                                                                                                                                                                                                                                                                                                                                                                                                                                                                                                                                                                                                                                                                                                                                                                     |
| Manuscript ID                 | bmjopen-2020-039035                                                                                                                                                                                                                                                                                                                                                                                                                                                                                                                                                                                                                                                                                                                                                                                                                                                                                                                                                                                                                                                                                                                                                                                                                                                                                                                                 |
| Article Type:                 | Protocol                                                                                                                                                                                                                                                                                                                                                                                                                                                                                                                                                                                                                                                                                                                                                                                                                                                                                                                                                                                                                                                                                                                                                                                                                                                                                                                                            |
| Date Submitted by the Author: | 01-Apr-2020                                                                                                                                                                                                                                                                                                                                                                                                                                                                                                                                                                                                                                                                                                                                                                                                                                                                                                                                                                                                                                                                                                                                                                                                                                                                                                                                         |
| Complete List of Authors:     | Rove, Kyle; Children's Hospital Colorado, Department of Pediatric Urology; University of Colorado, Department of Surgery, Division of Urology<br>Strine, Andrew; Cincinnati Children's Hospital Medical Center, Division of Pediatric Urology<br>Wilcox, Duncan; Children's Hospital Colorado, Department of Pediatric Urology; University of Colorado, Department of Surgery, Division of Urology<br>Vricella, Gino; St. Louis Children's Hospital, Division of Pediatric Urology; Washington University in Saint Louis School of Medicine, Department of Surgery, Division of Urology<br>Welch, Timothy; St. Louis Children's Hospital, Department of Anesthesiology; Washington University in Saint Louis School of Medicine, Department of Surgery, Division of Urology<br>VanderBrink, Brian; Cincinnati Children's Hospital Medical Center, Division of Pediatric Urology<br>Chu, David; Ann and Robert H Lurie Children's Hospital of Chicago, Division of Urology<br>Chaudhry, Rajeev; Children's Hospital of Pittsburgh of University of Pittsburgh Medical Center, Division of Pediatric Urology<br>Zee, Rebecca; Children's Hospital of Richmond at VCU, Division of Urology<br>Group, PURSUE Study<br>Brockel, Megan ; Children's Hospital Colorado, Department of Anesthesiology; University of Colorado, Department of Anesthesiology |
| Keywords:                     | Bladder disorders < UROLOGY, Pain management < ANAESTHETICS, Paediatric urology < PAEDIATRIC SURGERY, Urinary incontinences < UROLOGY, Quality in health care < HEALTH SERVICES ADMINISTRATION & MANAGEMENT                                                                                                                                                                                                                                                                                                                                                                                                                                                                                                                                                                                                                                                                                                                                                                                                                                                                                                                                                                                                                                                                                                                                         |
|                               |                                                                                                                                                                                                                                                                                                                                                                                                                                                                                                                                                                                                                                                                                                                                                                                                                                                                                                                                                                                                                                                                                                                                                                                                                                                                                                                                                     |

SCHOLARONE™  
Manuscripts

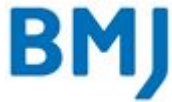

I, the Submitting Author has the right to grant and does grant on behalf of all authors of the Work (as defined in the below author licence), an exclusive licence and/or a non-exclusive licence for contributions from authors who are: i) UK Crown employees; ii) where BMJ has agreed a CC-BY licence shall apply, and/or iii) in accordance with the terms applicable for US Federal Government officers or employees acting as part of their official duties; on a worldwide, perpetual, irrevocable, royalty-free basis to BMJ Publishing Group Ltd ("BMJ") its licensees and where the relevant Journal is co-owned by BMJ to the co-owners of the Journal, to publish the Work in this journal and any other BMJ products and to exploit all rights, as set out in our [licence](#).

The Submitting Author accepts and understands that any supply made under these terms is made by BMJ to the Submitting Author unless you are acting as an employee on behalf of your employer or a postgraduate student of an affiliated institution which is paying any applicable article publishing charge ("APC") for Open Access articles. Where the Submitting Author wishes to make the Work available on an Open Access basis (and intends to pay the relevant APC), the terms of reuse of such Open Access shall be governed by a Creative Commons licence – details of these licences and which [Creative Commons](#) licence will apply to this Work are set out in our licence referred to above.

Other than as permitted in any relevant BMJ Author's Self Archiving Policies, I confirm this Work has not been accepted for publication elsewhere, is not being considered for publication elsewhere and does not duplicate material already published. I confirm all authors consent to publication of this Work and authorise the granting of this licence.

Rove, Strine, Wilcox, Vricella, Welch,  
VanderBrink, Chu, Chaudhry, Herndon, PURSUE, Brockel

Design Considerations for PURSUE Study

# Design and Development of the Pediatric Urology Recovery After Surgery Endeavor (PURSUE) Multi-Center Pilot and Exploratory Study

Kyle O. Rove MD<sup>‡</sup>, Andrew C. Strine MD<sup>§</sup>, Duncan T. Wilcox MD MBBS<sup>‡</sup>, Gino J. Vricella MD<sup>□</sup>, Timothy P. Welch MD<sup>¶</sup>, Brian VanderBrink MD<sup>§</sup>, David I. Chu MD MSCE<sup>Δ</sup>, Rajeev Chaudhry MD<sup>b</sup>, Rebecca S. Zee, MD<sup>c</sup>, PURSUE Study Group, Megan A. Brockel MD<sup>a</sup>

*Corresponding author for proofs and reprints:*

‡ Kyle O. Rove, MD  
Assistant Professor  
Children's Hospital Colorado  
University of Colorado School of Medicine  
13123 E. 16th Ave, B-463  
Aurora, CO 80045  
USA  
720-777-1234  
kyle.rove@childrenscolorado.org

*Coauthors addresses:*

§ Division of Pediatric Urology, Cincinnati Children's, Cincinnati, Ohio, USA

‡ Department of Pediatric Urology, Children's Hospital Colorado, University of Colorado, Aurora, CO, USA

□ Division of Pediatric Urology, St. Louis Children's Hospital, Washington University in St. Louis, St. Louis, MO, USA

¶ Department of Anesthesiology, St. Louis Children's Hospital, Washington University in St. Louis, St. Louis, MO, USA

Δ Division of Urology, Ann & Robert H. Lurie Children's Hospital of Chicago, Chicago, IL, USA

<sup>b</sup> Division of Pediatric Urology, Children's Hospital of Pittsburgh, University of Pittsburgh Medical Center, Pittsburgh, PA, USA

<sup>c</sup> Division of Urology, Children's Hospital of Richmond at VCU, Richmond, VA, USA

<sup>a</sup> Department of Anesthesiology, Children's Hospital Colorado, University of Colorado, Aurora, CO, USA

**Abstract word count:** 299 words (300 word limit)

**Body word count:** 3,997 words (4,000 word limit)

**Keywords:** enhanced recovery after surgery, bladder augmentation, Mitrofanoff, urinary diversion, protocol

## Abstract

### Introduction:

Lower urinary tract reconstruction in pediatric urology represent a physiologically-stressful event that is associated with high complication rates, including readmissions and emergency room visits. Enhanced Recovery After Surgery (ERAS) protocol is a set of multidisciplinary, perioperative strategies designed to expedite surgical recovery without adversely impacting readmission or reoperation rates. Early pediatric urology data demonstrated ERAS reduced complications in this population.

### Methods and Analysis:

In 2016, a working group of pediatric urologists and anesthesiologists convened to develop an ERAS protocol suitable for patients undergoing lower urinary tract reconstruction and define study process measures, patient-reported outcomes, and clinically-relevant outcomes in pediatric and adolescent/young adult patients.

A multicenter, prospective, propensity-matched, case control study design was chosen. Each center will enroll five pilot patients to verify implementation. Subsequent enrolled patients will be propensity matched to historical controls. Eligible patients must be aged 4 to 25 years and undergoing planned operations (bladder augmentation, continent ileovesicostomy or appendicovesicostomy, or urinary diversion). 64 ERAS patients and 128 controls will be needed to detect a decrease in mean length of stay by two days.

Pilot phase outcomes include attainment of  $\geq 70\%$  mean protocol adherence per patient and reasons for protocol deviations. Exploratory phase primary outcome is ERAS protocol adherence, with secondary outcomes including length of stay, readmissions, reoperations, emergency room visits, 90-day complications, pain scores, opioid usage, and differences in Quality of Recovery 9 scores.

### Ethics and Dissemination:

This study has been registered with authors' respective institution review boards and will be published in peer-reviewed journals. It will provide robust insight into the feasibility of ERAS in pediatric urology, determine patient outcomes, and allow for iteration of ERAS implementations as new best practices and evidence for pediatric surgical care arise. We anticipate this study will take 4 years to fully accrue with completed follow up.

### Registration Details:

Pediatric Urology Recovery After Surgery Endeavor (PURSUE, ClinicalTrials.gov NCT03245242) is a multicenter, prospective, case-control study that will examine outcomes in pediatric and adolescent/young adult patients undergoing lower urinary tract reconstructive operations who receive care under an ERAS pathway.

## Article Summary

### Strengths and Limitations of This Study

- This protocol outlines a multicenter, prospective propensity score-matched cohort study of an Enhanced Recovery After Surgery (ERAS) protocol applied to pediatric and adolescent/young adult patients undergoing lower urinary tract reconstructive surgery.

Rove, Strine, Wilcox, Vricella, Welch,  
VanderBrink, Chu, Chaudhry, Herndon, PURSUE, Brockel

Design Considerations for PURSUE Study

- Each participating free-standing pediatric center will take part in a pilot phase to understand barriers to implementation, protocol compliance, and protocol uptake and an exploratory phase to demonstrate clinical outcomes related to the ERAS care pathway as compared to propensity matched recent historical controls.
- Primary and secondary outcomes of interest are relevant to the underlying quality improvement initiative to implement a standardized care pathway (ERAS), reflect clinical outcomes, and include patient-reported outcome measures to understand the patient and family perspective.
- The comparator group will be recent historical patients who have undergone the same operations. Propensity score matching based on *a priori* identified covariates will be used to reduce confounding based on non-random assignment of perioperative care (e.g., routine care versus ERAS protocol). Time-series analysis will provide insight into any ongoing changes occurring over time with regards to either process, clinical, or balancing measures.

# Introduction

## Background

Lower urinary tract reconstruction represents some of the most challenging surgical operations performed by pediatric urologists. These operations can be long, complex, and often involve a bowel resection and anastomosis. Patients undergoing these operations are at high risk for postoperative complications, including nausea and vomiting, ileus, surgical site infection, urinary tract infection, and pyelonephritis.[1] To date, the optimal perioperative care for these patients has not been well-defined, with practices varying widely from institution to institution.[2,3]

## Relevance

Since its initial description in the late 1990s, enhanced recovery after surgery (ERAS) has emerged as an innovative tool in the care of adult surgical patients. ERAS represents a multidisciplinary protocol with a strong implementation framework that targets all phases of care for the surgical patient.[4] ERAS has been shown in various adult surgical populations to maintain adequate pain control and facilitate earlier return to baseline function without adverse impact on complication or readmission rate through evidence-based care.[5-7] A large multicenter ERAS study of adult colorectal resection and hip fracture repairs demonstrated clinically-significant reductions in length of stay (0.4–0.9 days), postoperative major complications (rate ratio 0.28 compared to pre-ERAS controls [95% confidence interval 0.12–0.68]), and decreased opioid use (by 31–42%).[7] Data audits function as an essential part of an ERAS protocol, allowing teams to review compliance and use continuous quality improvement methodology to iterate and target areas requiring amelioration, further improving clinical outcomes.[8]

Standardizing perioperative care of complex pediatric urology patients using an

1  
2  
3 approach like ERAS has potential to reduce undesirable variations in care, optimize  
4 recovery, and lead to improvements in surgical outcomes.[9]  
5  
6  
7

8  
9 To date, experience with ERAS in pediatric patients has been limited. Published studies  
10 have methodological limitations including retrospective nature, lack of specified  
11 inclusion and exclusion criteria, poorly defined ERAS protocol elements, small sample  
12 size, lack of audits, and/or limited follow up.[10,11] A single-center, prospective pilot trial  
13 of 13 pediatric urology patients undergoing procedures with ERAS, compared to 26  
14 historical controls, demonstrated fewer complications and reduced length of stay from 8  
15 to 5.7 days.[12] Another group studying a similar population retrospectively reported  
16 even greater improvements in length of stay.[13] These small experiences reflect that  
17 some pediatric operations occur with far less frequency than common adult operations,  
18 increasing variability in postoperative care and overall experience from center to center  
19 and surgeon to surgeon. The evidence base for perioperative practices are not  
20 necessarily well developed or even valid in a pediatric population. Additionally, parents,  
21 guardians and families are integral to the care of pediatric surgical patients and their  
22 involvement in a pathway should be considered.[11]  
23  
24  
25  
26  
27  
28  
29  
30  
31  
32  
33  
34  
35  
36  
37  
38  
39  
40  
41

### 42 **Anticipated Impact**

43 To address these issues, a collaborative multicenter effort was initiated by the study  
44 authors with goals of defining and implementing an ERAS protocol adapted for pediatric  
45 urology patients and studying both implementation and outcomes prospectively.  
46 Centers will gain valuable experience in implementation, which requires stakeholder  
47 engagement and multidisciplinary participation, while the study group seeks to  
48 understand system, provider, and patient-level barriers to protocolized surgical care.  
49  
50  
51  
52  
53  
54  
55  
56  
57  
58



1  
2  
3 Furthermore, study of ERAS in a pediatric and emerging young adult population  
4  
5 undergoing metabolically stressful operations has the potential to demonstrate the value  
6  
7 of standardized care similar to gains seen in adult counterparts.  
8  
9

## 10 11 **Objectives**

12 Pediatric Urology Recovery After Surgery Endeavor (PURSUE) study has two primary  
13  
14 objectives: 1, to determine if an ERAS protocol can decrease variation in care for  
15  
16 complex pediatric patients while simultaneously improving recovery time from surgery  
17  
18 without any change in balancing measures, and 2, to broaden exposure of the pediatric  
19  
20 urology community to ERAS by engaging study centers in ERAS protocol  
21  
22 implementation at geographically-diverse medical centers. In this report, we describe  
23  
24 study design considerations, ERAS protocol definitions, and rationale for the PURSUE  
25  
26 study.  
27  
28  
29  
30  
31

## 32 **Methods and Analysis**

### 33 **ERAS Protocol Development**

34 The study group first met to discuss the proposal for a multicenter study at The  
35  
36 Societies for Pediatric Urology Fall Congress in September 2016 in Dallas, Texas, USA.  
37  
38 Follow up phone conferences were held several times over the following year. The  
39  
40 participants at the initial meeting included attendings, fellows, and residents from  
41  
42 pediatric urology and pediatric anesthesiology. Six institutions participated in the original  
43  
44 discussions and committed to the study (represented by the authors).  
45  
46  
47  
48  
49

50 Prior to this work, the study group was only aware of a single pediatric urology ERAS  
51  
52 protocol that was adapted for use in patients predominantly with neurogenic bowel and  
53  
54 bladder (e.g., myelomeningocele).[12] This was used as a starting point and was similar  
55  
56  
57

1  
2  
3 to existing adult urology ERAS protocols for radical cystectomy.[14] Modification and  
4 addition to this protocol were arrived at by literature review and group consensus.  
5  
6 Highlights of the original protocol include omission of formal preoperative bowel  
7 preparation, multimodal analgesia with regional blocks for all, no nasogastric tube  
8 postoperatively, early feeding (clear liquids in evening after leaving operating room,  
9 regular diet following day), and early discontinuation of intravenous fluids by  
10  
11 postoperative day 2. **Table 1** lists all 20 ERAS protocol elements defined for the  
12  
13 purpose of this study.  
14  
15  
16  
17  
18  
19  
20  
21

22 The authors identified several important components to add to the original pilot protocol,  
23 including ensuring a preoperative clear liquid complex carbohydrate load up to 2 hours  
24 prior to surgery and encouraging patients to eat a regular diet the night before surgery.  
25  
26 Minimizing *nil per os* duration is crucial to limit metabolic stress, minimize catabolic  
27 response from surgery, reduce risk of short term atrophy of the gastrointestinal villi, and  
28 protect patients against developing insulin resistance, which has been associated with  
29 postoperative complications.[5] Specifically, the study group sought to avoid situations  
30 where patients drink only clear liquids for several days prior to the operation, nullifying  
31 the intentions of ERAS precepts.  
32  
33  
34  
35  
36  
37  
38  
39  
40  
41  
42  
43

44 Venous thromboembolism (VTE) prophylaxis was added with the caveat that it should  
45 apply only to those patients with certain risk factors (age  $\geq$  14 years, BMI  $\geq$  30 kg/m<sup>2</sup>,  
46 history of VTE, history of malignancy, history of coagulation disorder). The primary  
47 recommendation was for sequential compression devices to be placed on the patient  
48 prior to induction. No recommendation was made for pharmacologic prophylaxis on the  
49 basis that the risk/benefit profile may not make sense in children.[15,16] Since creating  
50  
51  
52  
53  
54  
55  
56  
57

60

1  
2  
3 this clinical pathway, there have been new reports regarding clarification of pediatric risk  
4 factors for VTE.[16,17] Future revisions of the protocol will require adjustment to match  
5  
6 newer evidence.  
7  
8  
9

10  
11 Normothermia was also added and defined as a core body temperature between 36–  
12  
13 38°C from incision to close time. Any value outside this range nullifies the measure.  
14  
15 Maintaining normal temperatures may minimize risk of wound infection in adults.[18,19]  
16  
17 Notably, normothermia promotes normal metabolic demands on the body (including  
18  
19 pharmacokinetics of anesthetics) and minimizes stress from hypo- or hyperthermic  
20  
21 conditions.[20] This was a Surgical Care Improvement Project core measure (SCIP-INF-  
22  
23 10).[21] The evidence underlying this measure is not level I, but the study group  
24  
25 included it for its importance from a physiologic perspective and to match existing  
26  
27 published ERAS principles.  
28  
29  
30  
31

32  
33 Minimizing surgical drains is another ERAS goal. To adapt this to lower urinary tract  
34  
35 reconstruction, it was defined as avoiding placement of intraperitoneal or subcutaneous  
36  
37 drains. This measure does not include urinary drains, as the group felt these to be  
38  
39 important to protect and maximize drainage of the urinary tract postoperatively as a  
40  
41 matter of urologic principle. To account for those patients in whom a clinical decision  
42  
43 has been made to leave an intraperitoneal or subcutaneous drain, a postoperative  
44  
45 measure was added that any such drains should be removed on or by postoperative  
46  
47 day four. This day was proposed on the basis of pilot data showing that many patients  
48  
49 are ready to go home and that these drains are rarely helpful.  
50  
51  
52  
53  
54  
55  
56  
57  
58

1  
2  
3 The remainder of the measures from the pilot study were adopted and definitions  
4 updated to be internally consistent and account for most foreseeable scenarios. Refer to  
5  
6  
7 **Appendix Table 1** for complete definitions of all 20 ERAS protocol measures.  
8  
9

10 Importantly, the ERAS protocol as defined was to be adopted by all participating centers  
11 as standard of care for treatment of patients undergoing urologic reconstructive surgery.  
12  
13  
14

### 15 **Study Design**

16 Several study designs were debated and discussed, including randomized controlled  
17 trials (RCT) of various permutations as well as prospective observational studies.  
18  
19

20 Important characteristics discussed included ensuring both implementation and study  
21 design were feasible with minimal overhead, robust data collection through the use of a  
22 shared REDCap database, *a priori* defined ERAS protocol definitions and outcomes,  
23 inclusion of both pediatric (ages 4-17 years) and emerging young adult (18-25) patients  
24 undergoing lower urinary tract reconstruction, and identification of an adequate control  
25 group to demonstrate clinically meaningful differences.  
26  
27  
28  
29  
30  
31  
32  
33  
34  
35

36 Several centers (Children's Hospital Colorado, St. Louis Children's Hospital, and  
37 Cincinnati Children's Hospital Medical Center) already had ERAS protocols in place (or  
38 started them concurrently during study startup) and randomization by patient was felt to  
39 lack equipoise on the basis of pilot data showing substantial patient benefit.  
40  
41  
42  
43  
44  
45

46 Randomization by protocol item was deemed too complex and not feasible.  
47

48 Randomization by surgeon was also felt to lack equipoise, although this is debatable  
49 from the standpoint that opposing views on ERAS implementation details may represent  
50 unknowable qualities of the intervention. Randomization by center would suffer similar  
51 pitfalls identified above. Blinding and allocation concealment are staples of RCTs, but  
52  
53  
54  
55  
56  
57

1  
2  
3 are not possible in the setting of implementation of a complex protocol involving tens of  
4 interventions that touch nearly every aspect of the diffuse perioperative space.  
5  
6

7 Furthermore, ERAS relies on standardization of perioperative care, and having patients  
8 on either an ERAS protocol or ad hoc care would necessarily create an unwelcome  
9 opportunity for cross contamination issues. A stepped wedge cluster randomized trial  
10 design was also considered and is being planned for a separate large multicenter effort  
11 in pediatric bowel resection for inflammatory bowel disease.[22] Because two centers in  
12 this study group already had existing ERAS protocols, this was not compatible with this  
13 option.  
14  
15  
16  
17  
18  
19  
20  
21  
22

23  
24 The notion that RCT may not be appropriate in all circumstances, particularly within the  
25 realm of surgical procedures, is not new and has been discussed previously.[23] There  
26 is an applicable framework for advancing surgical care through research and creation of  
27 evidence-based practices called the Idea, Development, Exploration, Assessment, and  
28 Long-term study (IDEAL) framework.[24] In this classification, surgical innovation  
29 passes through several different stages. ERAS in pediatric urology is in the beginning  
30 stages and falls under stages 2 (Development) or stage 3 (Exploration), given the  
31 ground work shown in two small early studies.[12,13] The IDEAL framework defines  
32 goals and methods that are best suited to each stage. At stage 3, prospective study is  
33 carried out in either an uncontrolled manner or in smaller size than a full-blown  
34 controlled trial. Because of the limitations posed by ERAS, equipoise, and surgeon  
35 experience, the study group determined the best study would be a case-control study,  
36 with ERAS patients making up a prospective observational arm and propensity-matched  
37 controls coming from recent patients not exposed to the ERAS protocol.  
38  
39  
40  
41  
42  
43  
44  
45  
46  
47  
48  
49  
50  
51  
52  
53  
54  
55  
56  
57  
58  
59  
60

1  
2  
3 After discussion, the study group defined two study phases. First, a pilot phase will  
4 assess study recruitment across sites, ERAS implementation, protocol adherence, and  
5 study procedures. Second, an exploration phase will prospectively compare all patients  
6 on the ERAS protocol to recent historical controls matched on propensity to undergo  
7 surgery with utilization of an ERAS protocol, should they have been treated presently,  
8 using clinically-important covariates deemed most likely to affect recovery. Data from  
9 the pilot study will be fed forward into the exploratory study. The decision for a built-in  
10 pilot study allows each center to build comfort level with study procedures along with  
11 maturation of the ERAS protocol. From a methodological standpoint, a pilot study is  
12 setup like a smaller version of the larger study without the need to define sample size or  
13 demonstrate clinically important outcomes but rather examine outcomes related to the  
14 setup of the study itself.[25] A built-in pilot component at each center (first five patients)  
15 will allow ascertainment of treatment team perceptions of ERAS and barriers to protocol  
16 implementation. While five is a small number, high-volume centers only perform 10–15  
17 of these cases per year.[26]

### 38 **Center Eligibility and Patient Selection**

39 Centers will be allowed to enroll patients in the study if the center performed a minimum  
40 of five lower urinary tract reconstructive operations in the year prior to center enrollment.  
41 This constitutes a baseline measure of quality and familiarity with the care of these  
42 complex patients perioperatively.

43 Surgeons and research assistants at each respective center will be responsible for  
44 subject identification and recruitment through existing clinical relationships. Patients  
45 aged of 4–25 years old undergoing the following lower urinary tract reconstructive

1  
2  
3 operations may be enrolled after providing informed consent (and assent, when  
4 applicable): augmentation enterocystoplasty, creation of continent urinary channel  
5 (appendicovesicostomy, ileovesicostomy, or colovesicostomy), creation of an antegrade  
6 continence enema channel, and incontinent urinary diversions (ileal conduit with or  
7 without cystectomy or ileovesicostomy). Because some of these operations may be  
8 done with or without a bowel anastomosis—which is a major risk factor for surgical  
9 stress, increased operative time, and risk of ileus—bowel anastomosis will be tracked  
10 and used for matching cases to controls as it is a strong effect modifier. Some providers  
11 noted patients with neurogenic bowel not on a bowel management program (retrograde  
12 enemas, oral stool softeners, or rectal suppositories) may be at increased risk  
13 prolonged return of bowel function, ileus, bowel obstruction, or anastomotic bowel leak.  
14 For this reason, clinically constipated patients defined as Bristol 1 or 2 stools more than  
15 once per week, bowel movement interval greater than every other day, or palpable stool  
16 in > 50% of colon on physical preoperative exam will be excluded from the study.  
17 Patients with these findings become eligible if their stooling pattern is addressed at least  
18 4 weeks in advance of surgery with implementation of a bowel management program  
19 continued up to the night before surgery.  
20  
21  
22  
23  
24  
25  
26  
27  
28  
29  
30  
31  
32  
33  
34  
35  
36  
37  
38  
39  
40  
41  
42

43 The use of historical controls has long been felt to be controversial, secondary to the  
44 retrospective nature of their identification and data collection and potential biases. Using  
45 quality improvement methodology, in which historical controls are often used to  
46 compare outcomes to an intervention cohort, run diagrams and interrupted time-series  
47 analysis can provide insight into changes occurring over time with regards to either  
48 process, clinical outcome, or balancing measures.[27] This has the benefit of ensuring  
49  
50  
51  
52  
53  
54  
55  
56  
57  
58

1  
2  
3 that the prospectively enrolled patient outcomes are attributed to the intervention  
4 (ERAS) and not to changes in patient care that were already underway prior to  
5  
6 implementation. While use of prospective controls from non-ERAS institutions might  
7  
8 serve as a better comparison (reduced bias, prospective data collection, parallel  
9  
10 comparison of modern surgical patients undergoing similar operations), the study group  
11  
12 felt that observational bias (Hawthorne effect) might influence malleable outcomes such  
13  
14 as length of stay.  
15  
16  
17  
18  
19

### 20 **Outcome Measures**

21 The pilot phase outcomes of interest include enrolling a minimum of two patients per  
22  
23 center in first six months, and completing at least 90 days follow up on the first five  
24  
25 enrolled patients (**Figure 1**). A goal of  $\geq 70\%$  protocol item adherence (out of 20) at  $\geq$   
26  
27 75% of study centers was set. Finally, barriers to implementation will be identified and  
28  
29 may determine if there is a need to optimize the protocol for wider application.  
30  
31  
32  
33  
34

35 The primary outcome of the exploratory phase is adherence to the ERAS protocol with  
36  
37 number of items achieved (out of 20). Secondary outcomes include length of stay, 30-  
38  
39 day readmissions, 90-day reoperations, 90-day returns to the emergency room, 90-day  
40  
41 complications by Clavien-Dindo classification (see **Table 2** for full list of defined  
42  
43 complications), number of long-term complications within 1 year (**Table 3**), minimum,  
44  
45 median, maximum daily pain score during first 7 days after surgery, and mean daily IV  
46  
47 morphine equivalents (mg/kg) usage during first 3 days after surgery.[28] It is important  
48  
49 to clarify that because this is an observational trial and the ERAS protocol is  
50  
51  
52  
53  
54  
55  
56  
57  
58  
59  
60



1  
2  
3 implemented as standard of care at each center, the collection of complications here is  
4  
5 a clinical outcome measure rather than one seen as a result of study intervention.  
6  
7

8  
9 In addition to the objective clinical outcomes listed, patient- and family-reported  
10  
11 outcome measures will be administered to assess the impact of surgery on work and  
12  
13 school (e.g., missed days of each) and adjustment time at home needed to return to  
14  
15 “normal” (i.e., daily routines not impacted heavily by having had surgery). These  
16  
17 instruments include open-ended, non-validated parent and child surveys to be given  
18  
19 pre- and postoperatively, and a Quality of Recovery 9 questionnaire to assess overall  
20  
21 return of function (given before and after surgery, and again at clinic follow up).[29]  
22  
23

24 **Figure 2** demonstrates which outcome measures will be tracked over time with respect  
25  
26 to the index surgery. Patients will be followed for one year, specifically to ensure that  
27  
28 patients with a ventriculoperitoneal (VP) shunt do not experience increased rates of  
29  
30 externalization, infection, or revision which has long been a concern of the  
31  
32 community.[30]  
33  
34  
35  
36

### 37 **Data Collection**

38  
39 A shared REDCap database has been designed, tested, and implemented for use for  
40  
41 this study. Data use agreements have been executed between centers and data sharing  
42  
43 language was incorporated into patient consent to allow sharing of de-identified data  
44  
45 sets maintaining patient confidentiality. The majority of perioperative process, outcome,  
46  
47 and balancing measures are charted within the medical record as part of standard of  
48  
49 care. Where possible, these will be automatically abstracted electronically as five out of  
50  
51 the six study centers use the Epic electronic health record system. In cases where data  
52  
53 is not normative or where it requires clinical interpretation or cannot be abstracted  
54  
55  
56  
57  
58

1  
2  
3 electronically, manual chart review by research assistants trained by the study team will  
4  
5 be done. Continuous data quality checks will be completed quarterly, including analysis  
6  
7 of missing required data and any discrepancies.  
8  
9

10  
11 After primary accrual is completed, the study committee plans to transition the shared  
12  
13 database into a shared clinical registry for ongoing data collection to continue to study  
14  
15 ERAS and further refinements to the care pathway.  
16  
17

### 18 19 **Statistical Analysis**

20 A total of 64 ERAS patients will be needed to detect a decrease in mean overall LOS by  
21  
22 2 days, with type I error of 5% (false positive) and type II error of 20% (false negative)  
23  
24 based on data from the pilot study showing mean LOS of 8.0 days (SD 7.3) for historical  
25  
26 patients versus 5.7 days (SD 5.1) for patients who were treated under the ERAS  
27  
28 protocol. Patients will be propensity score-matched on likelihood to have been treated  
29  
30 under an ERAS protocol 1:2 to recent historical controls from 5 years prior to the  
31  
32 initiation of the ERAS protocol. Propensity matching controls for measured baseline  
33  
34 covariates before analysis of the outcomes to reduce confounding. Based on pilot data  
35  
36 (mean 2.1 complications/patient [SD 1.9] historically and versus 1.3  
37  
38 complications/patient [SD 1.2] under ERAS), this study will also be powered to detect a  
39  
40 decrease in any grade complications per patient by 50%. Patients will be divided into  
41  
42 two strata: those who underwent and did not undergo a bowel anastomosis as part of  
43  
44 the index operation. Propensity score-matching within the two strata using nearest-  
45  
46 neighbor algorithm (also referred to as greedy matching) will occur on the following  
47  
48 variables: age, sex, chronic kidney disease, presence of VP shunt, planned bladder  
49  
50 augmentation, history of prior abdominal surgery (other than VP shunt), diagnosis of  
51  
52  
53  
54  
55  
56  
57  
58  
59  
60

1  
2  
3 myelomeningocele, ambulatory status, and center. Bowel anastomosis was determined  
4  
5 by the study group to be a strong effect modifier and thus patients will be exactly  
6  
7 matched on that variable (creating two strata) and propensity matched on remaining  
8  
9 covariates to avoid overfitting.  
10  
11

12  
13 Because of the nature of propensity-matched data, care must be taken for comparison  
14  
15 of historical controls and ERAS cases. Differences in baseline characteristics between  
16  
17 matched groups will be assessed using methods that are not influenced by sample size  
18  
19 and that do not refer to a hypothetical population (i.e., standardized differences).[31]  
20  
21 The Mantel-Haenszel test will be used to compare proportions, and generalized linear  
22  
23 modelling with generalized estimating equations to adjust for the matching design will  
24  
25 be used to assess association of outcomes and predictors.[32] Two-tailed p-values <  
26  
27 0.05 will be considered significant. No interim analyses are planned.  
28  
29  
30  
31

### 32 **Study Committee**

33 Given the importance of a strong implementation serving as a foundation for  
34  
35 success, the study group has created several committees, including an organizing  
36  
37 committee and audit committee. The organizing committee is charged with overseeing  
38  
39 data collection, arranging study conference calls and meetings and adjudicating  
40  
41 authorship for subsequent papers laid out through a set of bylaws. The organizing  
42  
43 committee serves as a backstop to proper trial conduct under the purview of study  
44  
45 (KOR) and site primary investigators (ACS, GJV, RC, DIC, CDAH). The audit committee  
46  
47 arguably serves a more important role, overseeing regular clinical audits of ERAS  
48  
49 protocol compliance. The committee is charged with meeting after each center's pilot  
50  
51 phase (5 patients) and ad hoc thereafter, and they will review overall compliance and  
52  
53  
54  
55  
56  
57  
58  
59  
60

1  
2  
3 serve as an external study group as part of plan/do/study/act (PDSA) quality  
4  
5 improvement methodology to identify challenging areas and suggest solutions that may  
6  
7 be novel for that center. This highlights the point that the ERAS clinical pathway sets  
8  
9 high-level goals, but leaves implementation details and specifics to each center. This  
10  
11 creates heterogeneity that mirrors real-world quality improvement projects, improving  
12  
13 the generalizability of the project, but can lead to maladaptive internal center processes.  
14  
15 The audit committee's goal is to help each center identify issues early in the  
16  
17 implementation and aid with finding creative solutions.  
18  
19  
20  
21

### 22 **Strengths and Limitations of the Study Design**

23  
24 Strengths of this study design include its multicenter nature, which the authors aim to  
25  
26 use to demonstrate feasibility of ERAS implementation in a variety of geographically-  
27  
28 diverse pediatric-focused settings. Prospective data collection, *a priori* definitions of  
29  
30 protocol elements, and an exhaustive list of potential short and long-term complications  
31  
32 also lend strengths to its design. The SPIRIT checklist was used when preparing this  
33  
34 report.[33] Potential limitations of this study include variation in protocol implementation,  
35  
36 unsuccessful attempts at protocol implementation, unobserved patient characteristics or  
37  
38 other biases affecting outcome measures, and use of historical, retrospective controls.  
39  
40 The study group notes that there is very little level I evidence for protocol items in  
41  
42 pediatric patients. Some are extrapolated from adult evidence and may not hold true.  
43  
44 Additionally, patient-reported outcomes in this population are lacking. Pain interference  
45  
46 and validated general function measures are available but were not designed nor tested  
47  
48 expressly to measure recovery after surgery. When examining clinical outcomes,  
49  
50 propensity matching on clinically-relevant patient characteristics will allow meaningful  
51  
52  
53  
54  
55  
56  
57  
58  
59  
60

1  
2  
3 comparison, and run charts of patient care variables over time will shed light on any  
4  
5 changes in care patterns or outcomes that may have already been underway.  
6  
7

## 8 9 **Ethics and Dissemination**

10 This study was approved by each free-standing tertiary care children's hospital  
11  
12 respective institutional review board (St. Louis Children's Hospital 201703081,  
13  
14 Children's Hospital of Pittsburgh 17070089, Children's Hospital Colorado 17-0746,  
15  
16 Cincinnati Children's Hospital Medical Center 2017-3322, Ann & Robert H. Lurie  
17  
18 Children's Hospital 2019-2566, and Children's Hospital of Richmond at VCU  
19  
20 HM20015891). Prospectively enrolled patients who meet inclusion criteria will be  
21  
22 approached for inclusion by either a urologist or research assistant prior to the day of  
23  
24 surgery. Study protocol does not allow for patients to be approached in the preoperative  
25  
26 area to avoid patient or family coercion. No study activities will occur prior to obtaining  
27  
28 consent. Patients under 18 years age (and over specific ages that vary by center) will  
29  
30 assent to enrollment. Participants retain the right to withdraw at any point for any  
31  
32 reason. Importantly, non-adherence to the ERAS protocol or ERAS protocol deviation is  
33  
34 not grounds for removal from the study. Not every patient will necessarily meet clinical  
35  
36 standards for every protocol item. Rather, the goal of the ERAS protocol is to maximize  
37  
38 evidence-based strategies to return the patient to normal function. ERAS protocol  
39  
40 changes will only be made after completing primary accrual and analysis of results in  
41  
42 conjunction with a thorough literature review by the study committee. Patient and families  
43  
44 will be engaged in future revisions of the underlying ERAS clinical pathway that result  
45  
46 from evidence gathered through this study.  
47  
48  
49  
50  
51  
52  
53  
54  
55  
56  
57  
58  
59  
60

1  
2  
3 In conclusion, Pediatric Urology Recovery After Surgery Endeavor (PURSUE,  
4 ClinicalTrials.gov NCT03245242) is a multicenter, prospective propensity-matched  
5  
6  
7  
8  
9  
10  
11  
12  
13  
14  
15  
16  
17  
18  
19  
20  
21  
22  
23  
24  
25  
26  
27  
28  
29  
30  
31  
32  
33  
34  
35  
36  
37  
38  
39  
40  
41  
42  
43  
44  
45  
46  
47  
48  
49  
50  
51  
52  
53  
54  
55  
56  
57  
58  
59  
60

In conclusion, Pediatric Urology Recovery After Surgery Endeavor (PURSUE, ClinicalTrials.gov NCT03245242) is a multicenter, prospective propensity-matched case-control cohort study that will examine outcomes in pediatric and emerging young adult patients undergoing lower urinary tract reconstruction who receive care under an ERAS pathway.[34] Results will be published in peer-reviewed journals by study group members. This protocol marks the first phase of a collaborative quality improvement effort within the pediatric urology community to improve and standardize care of patients undergoing urologic reconstructive surgery.

### Acknowledgements

PURSUE study group members: Douglas E. Coplen (St. Louis Children's Hospital, St. Louis, MO, USA), Paul F. Austin (Texas Children's Hospital, Houston, TX, USA), Erica J. Traxel (St. Louis Children's Hospital, St. Louis, MO, USA), Jacob AuBuchon (St. Louis Children's Hospital, St. Louis, MO, USA), Robert P. Moore (St. Louis Children's Hospital, St. Louis, MO, USA), Vijaya M. Vemulakonda (Children's Hospital Colorado, Aurora, CO, USA), Brian T. Caldwell (Children's Hospital Colorado, Aurora, CO, USA), Carter J. Sevick (Children's Hospital Colorado, Aurora, CO, USA), Nicholas Burjek (Ann & Robert H. Lurie Children's Hospital of Chicago, Chicago, IL, USA), Elizabeth B. Yerkes (Ann & Robert H. Lurie Children's Hospital of Chicago, Chicago, IL, USA), Yvonne Y. Chan (Ann & Robert H. Lurie Children's Hospital of Chicago, Chicago, IL, USA), C.D. Anthony Herndon (Children's Hospital of Richmond at VCU, Richmond, VA, USA)

### Funding

A Children's Hospital Colorado Clinical and Operational Effectiveness and Patient Safety grant supports the implementation and study of an ERAS pathway. A Midwest Stone Institute grant supports PURSUE implementation at St. Louis Children's Hospital. Neither source of funding participated in the study design, collection, analysis or interpretation of data, in the writing of the manuscript, or in the decision to submit this manuscript for publication.

### Conflict of Interest

None

### Author Statement

KOR, BTC, and DTW organized the initial meeting to discuss study protocol concepts in Dallas, TX, USA in 2016. KOR, MAB, TPW, DIC, DTW, and GJV developed and refined

the 20-protocol ERAS pathway used in the study based on literature searches, screening and review. KOR led protocol development and created patient recruitment tools. KOR, MAB and ACS chair the PURSUE organizing committee that oversees study activities. KOR is the study primary investigator. KOR, ACS, CDAH, RC, DIC, GJV serve as site primary investigators. KOR performed the power analysis and statistical analysis plans with additional input, oversight and revision by DIC. KOR, ACS, DTW, GJV, TPW, BV, DIC, RC, RZ, PURSUE Study Group and MAB were involved in the study conception, design, protocol manuscript drafting and critical revision. All authors approve the final version.

## References

- 1 Schlomer BJ, Saperston K, Baskin L. National Trends in Augmentation Cystoplasty in the 2000s and Factors Associated with Patient Outcomes. *J Urol* 2013;**190**:1352–8. doi:10.1016/j.juro.2013.04.075
- 2 Wang H-HS, Lloyd JC, Wiener JS, *et al.* Nationwide Trends and Variations in Urological Surgical Interventions and Renal Outcome in Patients with Spina Bifida. *J Urol* 2016;**195**:1189–94. doi:10.1016/j.juro.2015.11.033
- 3 Weatherly DL, Szymanski KM, Whittam BM, *et al.* Comparing inpatient versus outpatient bowel preparation in children and adolescents undergoing appendicovesicostomy. *J Pediatr Urol* 2018;**14**:50.e1–50.e6. doi:10.1016/j.jpuro.2017.07.013
- 4 Ljungqvist O, Scott M, Fearon KC. Enhanced Recovery After Surgery: A Review. *JAMA Surg* 2017;**152**:292–8. doi:10.1001/jamasurg.2016.4952
- 5 Fearon KCH, Ljungqvist O, Meyenfeldt Von M, *et al.* Enhanced recovery after surgery: A consensus review of clinical care for patients undergoing colonic resection. *Clin Nutr* 2005;**24**:466–77. doi:10.1016/j.clnu.2005.02.002
- 6 Thiele RH, Rea KM, Turrentine FE, *et al.* Standardization of care: impact of an enhanced recovery protocol on length of stay, complications, and direct costs after colorectal surgery. *J Am Coll Surg* 2015;**220**:430–43. doi:10.1016/j.jamcollsurg.2014.12.042
- 7 Liu VX, Rosas E, Hwang J, *et al.* Enhanced Recovery After Surgery Program Implementation in 2 Surgical Populations in an Integrated Health Care Delivery System. *JAMA Surg* 2017;**152**:e171032. doi:10.1001/jamasurg.2017.1032
- 8 ERAS Compliance Group. The Impact of Enhanced Recovery Protocol Compliance on Elective Colorectal Cancer Resection: Results From an International Registry. *Ann Surg* 2015;**261**:1153–9. doi:10.1097/SLA.0000000000001029
- 9 Short HL, Heiss KF, Burch K, *et al.* Implementation of an enhanced recovery protocol in pediatric colorectal surgery. *J Ped Surg* 2017;**118**:1131–6. doi:10.1213/ANE.0000000000000228

- 10 Reismann M, Kampen von M, Laupichler B, *et al*. Fast-track surgery in infants and children. *J Ped Surg* 2007;**42**:234–8. doi:10.1016/j.jpedsurg.2006.09.022
- 11 Shinnick JK, Short HL, Heiss KF, *et al*. Enhancing recovery in pediatric surgery: a review of the literature. *J Surg Res* 2016;**202**:165–76. doi:10.1016/j.jss.2015.12.051
- 12 Rove KO, Brockel MA, Saltzman AF, *et al*. Prospective study of enhanced recovery after surgery protocol in children undergoing reconstructive operations. *J Pediatr Urol* 2018;**14**:252.e1–252.e9. doi:10.1016/j.jpuro.2018.01.001
- 13 Haid B, Karl A, Koen M, *et al*. Enhanced Recovery after Surgery Protocol for Pediatric Urological Augmentation and Diversion Surgery Using Small Bowel. *J Urol* 2018;**200**:1100–6. doi:10.1016/j.juro.2018.06.011
- 14 Daneshmand S, Ahmadi H, Schuckman AK, *et al*. Enhanced recovery protocol after radical cystectomy for bladder cancer. *J Urol* 2014;**192**:50–5. doi:10.1016/j.juro.2014.01.097
- 15 Ahn JJ, Merguerian PA, Shnorhavorian M. Incidence and risk factors associated with 30-day post-operative venous thromboembolism: A NSQIP-pediatric analysis. *J Pediatr Urol* 2018;**14**:335.e1–335.e6. doi:10.1016/j.jpuro.2018.04.009
- 16 Cairo SB, Lautz TB, Schaefer BA, *et al*. Risk factors for venous thromboembolic events in pediatric surgical patients: Defining indications for prophylaxis. *J Ped Surg* 2018;**53**:1996–2002. doi:10.1016/j.jpedsurg.2017.12.016
- 17 Sherrod BA, McClugage SG III, Mortellaro VE, *et al*. Venous thromboembolism following inpatient pediatric surgery: Analysis of 153,220 patients. *J Ped Surg* 2019;**54**:631–9.
- 18 Kurz A, Sessler DI, Lenhardt R. Perioperative normothermia to reduce the incidence of surgical-wound infection and shorten hospitalization. Study of Wound Infection and Temperature Group. *N Engl J Med* 1996;**334**:1209–15. doi:10.1056/NEJM199605093341901
- 19 Wong PF, KUMAR S, Bohra A, *et al*. Randomized clinical trial of perioperative systemic warming in major elective abdominal surgery. *Br J Surg* 2007;**94**:421–6. doi:10.1002/bjs.5631
- 20 Lenhardt R, Marker E, Goll V, *et al*. Mild Intraoperative Hypothermia Prolongs Postanesthetic Recovery. *Anesthes* 1997;**87**:1318–23.
- 21 Rosenberger LH, Politano AD, Sawyer RG. The Surgical Care Improvement Project and Prevention of Post-Operative Infection, Including Surgical Site Infection. *Surg Infect (Larchmt)* 2011;**12**:163–8. doi:10.1089/sur.2010.083



- 1  
2  
3 22 Clinical Trial NCT04060303: ENhancing Recovery in CHildren Undergoing Surgery  
4 for IBD (ENRICH-US). U.S. National Institutes of Health. 2019.  
5 <https://clinicaltrials.gov/ct2/show/NCT04060303> (accessed 25 Mar 2020).  
6  
7  
8 23 Wallis CJD, Detsky AS, Fan E. Establishing the Effectiveness of Procedural  
9 Interventions: The Limited Role of Randomized Trials. *JAMA* 2018;**320**:2421–2.  
10 doi:10.1001/jama.2018.16329  
11  
12 24 McCulloch P, Altman DG, Campbell WB, *et al.* No surgical innovation without  
13 evaluation: the IDEAL recommendations. *Lancet* 2009;**374**:1105–12.  
14 doi:10.1016/S0140-6736(09)61116-8  
15  
16 25 Thabane L, Ma J, Chu R, *et al.* A tutorial on pilot studies: the what, why and how.  
17 *BMC Med Res Methodol* 2010;**10**:42. doi:10.1186/1471-2288-10-1  
18  
19 26 Bowlin P, Siparsky G, Wilcox D. Nationwide Review of Bladder Augmentation in  
20 Pediatric Hospitals. *J Urol* 2011;**185**:e477. doi:10.1016/j.juro.2011.02.820  
21  
22  
23 27 EPOC Resources for review authors. Cochrane Effective Practice and Organisation  
24 of Care (EPOC). 2017. [https://epoc.cochrane.org/resources/epoc-resources-](https://epoc.cochrane.org/resources/epoc-resources-review-authors)  
25 [review-authors](https://epoc.cochrane.org/resources/epoc-resources-review-authors) (accessed 27 Mar 2019).  
26  
27  
28 28 Dindo D, Demartines N, Clavien P-A. Classification of Surgical Complications. *Ann*  
29 *Surg* 2004;**240**:205–13. doi:10.1097/01.sla.0000133083.54934.ae  
30  
31 29 Myles PS, Hunt JO, Nightingale CE, *et al.* Development and Psychometric Testing  
32 of a Quality of Recovery Score After General Anesthesia and Surgery in Adults.  
33 *Anesth Analg* 1999;**88**:83–90. doi:10.1213/00000539-199901000-00016  
34  
35 30 Gundeti MS, Godbole PP, Wilcox DT. Is bowel preparation required before  
36 cystoplasty in children? *J Urol* 2006;**176**:1574–6. doi:10.1016/j.juro.2006.06.034  
37  
38  
39 31 Austin PC. Balance diagnostics for comparing the distribution of baseline  
40 covariates between treatment groups in propensity-score matched samples. *Statist*  
41 *Med* 2009;**28**:3083–107. doi:10.1002/sim.3697  
42  
43 32 Fleiss JL, Levin B, Paik MC. The Analysis of Data from Matched Samples. In:  
44 *Statistical Methods for Rates and Proportions*. Hoboken, NJ: Wiley 2004; 373–406.  
45  
46 33 Chan AW, Tetzlaff JM, Altman DG, *et al.* SPIRIT 2013 statement: defining standard  
47 protocol items for clinical trials. *Ann Intern Med* 2013;**158**:200–7.  
48  
49  
50 34 Clinical Trial NCT03245242: Pediatric Urology Recovery After Surgery Endeavor  
51 (PURSUE). U.S. National Institutes of Health. 2017.  
52 <https://clinicaltrials.gov/ct2/show/NCT03245242> (accessed 31 Aug 2017).  
53  
54  
55  
56  
57  
58  
59  
60

## Figure Legends

**Figure 1.** Overview of study conception, implementation, center eligibility, patient inclusion and exclusion criteria, and design methodology arrived at through group consensus.

**Figure 2.** Timeline of patient enrollment, data collection including process and balancing measures, clinical outcomes, and patient-reported outcome measures during the PURSUE study.

## Tables

**Table 1.** Comprehensive list of pre-, intra-, and post-operative ERAS protocol items targeted by the care pathway, customized for pediatric urology patients. The definitions for these items were arrived at through multidisciplinary consensus of the study group.

| Pre-operative                                                                                              | Intra-operative                                              | Post-operative                                                                                                 |
|------------------------------------------------------------------------------------------------------------|--------------------------------------------------------------|----------------------------------------------------------------------------------------------------------------|
| Counsel about ERAS                                                                                         | Regional anesthesia<br>(catheter-based block)                | Nausea/vomiting prevention                                                                                     |
| Clear-liquid carbohydrate load<br>(10 mL/kg up to 350 mL)                                                  | Avoiding excess drains<br>(intraperitoneal or subcutaneous)  | Early feeding<br>(clears POD 0, regular POD 1)                                                                 |
| Avoid prolonged fasting<br>(eat regular diet and avoid prolonged<br>clears-only diet day prior to surgery) | Euvolemia<br>(4–7 mL/kg/hr crystalloid)                      | Early mobilization<br>(out of bed POD 1)                                                                       |
| No bowel preparation<br>(continue bowel regimen if on one)                                                 | Normothermia<br>(36–38°C during skin-to-skin time)           | Adjunctive pain medication<br>(acetaminophen and NSAID)                                                        |
| Antibiotic prophylaxis per AUA<br>guidelines                                                               | Minimizing opioids<br>(< 0.15 mg/kg IV morphine equivalents) | Early stoppage of intravenous fluids<br>(either discontinue or lower rate to keep<br>vein open [TKO] by POD 2) |
| DVT prophylaxis<br>(≥ age 14 or risk factors)                                                              | Minimally-invasive assistance<br>(at surgeon discretion)     | Early removal of extra drains/catheters<br>(non-urinary drain removal by POD 4)                                |
|                                                                                                            | No nasogastric tube on leaving OR                            | Minimizing opioids<br>(< 0.30 mg/kg/day IV morphine<br>equivalents)                                            |

**Table 2.** List of pre-defined postoperative short-term complications.**90-Day Short-Term Complications****Clavien Grade I**

electrolyte disturbance  
 fever ( $\geq 38^{\circ}\text{C}$ )  
 IV complication (infiltration)  
 nausea / vomiting  
 neuropraxia (positioning complication)  
 transient elevation in Cr (acute kidney injury)  
 wound dehiscence  
 incisional seroma  
 other grade I

**Clavien Grade II**

blood transfusion  
 catheter manipulation, ACE  
 catheter manipulation, Mitrofanoff / Monti / urethral / SPT  $\pm$  urinary retention  
 ileus requiring NG tube  $\pm$  TPN + nausea / vomiting  
 infection / bacteremia treated with Abx  $\pm$  fever  
 infection / pyelonephritis treated with Abx  $\pm$  fever  
 infection / superficial wound treated with bedside drainage, Abx  $\pm$  fever  
 infection / UTI treated with Abx  $\pm$  fever  
 infection / GI infection with Abx  $\pm$  fever  $\pm$  diarrhea  
 venous thromboembolism  
 lymphocele or chylous ascites treated conservatively with diet changes  
 other grade II

**Clavien Grade III**

abdominal abscess requiring IR / OR drainage  
 catheter malfunction / loss requiring placement in OR  
 fascial dehiscence / evisceration treated in OR  
 hemorrhage requiring embolization or OR  
 small bowel obstruction treated surgically in OR  
 urinoma requiring IR / OR drainage  
 ureteral obstruction requiring PNT by IR / OR  
 lymphocele or chyle leak requiring IR / OR drainage or intervention  
 other grade III

**Clavien Grade IV**

respiratory failure requiring ventilation  
 renal failure  
 multiorgan failure  
 sepsis  
 other grade IV

**Clavien Grade V**

death

**Table 3.** List of pre-defined postoperative long-term complications.**1-Year Long-Term Complications**


---

|                                                                             |
|-----------------------------------------------------------------------------|
| channel stenosis (any level) requiring revision                             |
| channel false passage                                                       |
| bowel obstruction                                                           |
| bladder stone formation                                                     |
| bladder perforation                                                         |
| incisional hernia                                                           |
| new onset metabolic acidosis                                                |
| new onset chronic kidney disease                                            |
| new onset renal scarring                                                    |
| VP shunt externalization                                                    |
| VP shunt infection (positive shunt tip and cerebral spinous fluid cultures) |

---

**Appendix Table 1.** Specific definitions of 20 ERAS process measures for pediatric lower urinary tract reconstructive operations.

| Phase of case       | Measure                        | Definition                                                                                                                                                                                                                                                                                                                                                                                                                                                                                                                                                                                                    |
|---------------------|--------------------------------|---------------------------------------------------------------------------------------------------------------------------------------------------------------------------------------------------------------------------------------------------------------------------------------------------------------------------------------------------------------------------------------------------------------------------------------------------------------------------------------------------------------------------------------------------------------------------------------------------------------|
| <i>Preoperative</i> | Counseling about ERAS          | This will typically be done as part of the consent process. Patients/families should not have their sole counseling occur in the preoperative area. Patients/families will be provided a standardized handout on ERAS and what to expect from surgery throughout the process from preoperative all the way through follow up.                                                                                                                                                                                                                                                                                 |
|                     | Clear-liquid carbohydrate load | Patients will be provided a commercially-available complex clear liquid carbohydrate liquid preoperatively. Patients will drink 10 mL/kg up to maximum of 350 mL (1 bottle) in the 3 to 2 hours prior to surgery in concert with American Society of Anesthesiologists (ASA) guidelines. If not available, other carbohydrate-rich clear liquids are also permissible on protocol, including Gatorade, PowerAde, Pedialyte. If the patient has a G-tube, these liquids can be administered per G-tube. Water should not be used. Other liquids outside this list are not permissible as part of the protocol. |

| Phase of case | Measure                 | Definition                                                                                                                                                                                                                                                                                                                                                                                                                                                                                                                                                                                                                                                                                                                                                                                                                                                                                                                                                                                                                                                   |
|---------------|-------------------------|--------------------------------------------------------------------------------------------------------------------------------------------------------------------------------------------------------------------------------------------------------------------------------------------------------------------------------------------------------------------------------------------------------------------------------------------------------------------------------------------------------------------------------------------------------------------------------------------------------------------------------------------------------------------------------------------------------------------------------------------------------------------------------------------------------------------------------------------------------------------------------------------------------------------------------------------------------------------------------------------------------------------------------------------------------------|
|               | Avoid prolonged fasting | Patients will remain adherent to ASA guidelines for pediatric patients. These include: solids up to 8 hours, non-human milk up to 6 hours, breast milk up to 4 hours, and clear liquids up to 2 hours prior to surgery. Patients should not be placed on an extended clear liquid diet prior to surgery. Patients should be encouraged to eat and drink normally up to the scheduled <i>nil per os</i> (NPO) guidelines stated above. If the patient does not eat > 24 hours prior to surgery or was placed on an extended clear liquid diet (no solid food on day before surgery) or did not receive normal G-tube feedings, if applicable, patient will not meet this criterion.                                                                                                                                                                                                                                                                                                                                                                           |
|               | No bowel preparation    | Patients will not receive oral laxatives, suppositories, oral antibiotic agents or other bowel prep agents outside of the patient's normal regimen (if on one). Many patients undergoing urology reconstruction have concomitant neurogenic bowel and are already on bowel programs which may include daily antegrade or retrograde enemas or oral laxatives. These should be maintained up to the day prior to surgery. Patients should be evaluated adequately (clinical history) well in advance of surgery to ensure they are not constipated. Clinical judgement should be used to modify any bowel regimen program at least 4 weeks prior to scheduled OR date.                                                                                                                                                                                                                                                                                                                                                                                        |
|               | Antibiotic prophylaxis  | Perioperative antibiotics should be administered within the guidelines of the American Urological Association and best hospital practices. AUA guidelines state that prophylaxis should consist of a weight-based dose of 2nd/3rd generation cephalosporin (e.g., cefoxitin) or alternatively an aminoglycoside + metronidazole or clindamycin (e.g. gentamycin + metronidazole) to be administered within 60 minutes of procedure start time (cut time). If patients have allergies or clinical conditions that preclude these, alternatives include ampicillin/sulbactam, ticarcillin/clavulanate, piperacillin/tazobactam or a fluoroquinolone. If patient is felt to have a UTI pre-operatively or has colonization, alternative antibiotic regimens tailored to recent culture results may be used. Antibiotics in most cases should be re-dosed in the operating room according to local standard and be discontinued within 24 hours of surgery per guidelines, but may be continued at the discretion of the surgeon based on clinical circumstance. |
|               | DVT prophylaxis         | Patients with one or more risk factors should have sequential compression devices (SCDs) placed on the lower extremities prior to induction of anesthesia. This will be verified by intraoperative nursing documentation. Risk factors include obesity (BMI ≥ 30), age ≥ 14, history of malignancy, or history of venous thromboembolic event. Patients who do not have any risk factors may safely omit any prophylaxis per standard of care. SCDs should be removed at the end of the case to encourage early mobility once reaching the surgical floor.                                                                                                                                                                                                                                                                                                                                                                                                                                                                                                   |

| Phase of case  | Measure                | Definition                                                                                                                                                                                                                                                                                                                                                                                                                                                                                                                                                                                                                                                                                                                                                                                                                                                                                                                                                                                                                                                                                                                                                                                                                                                                                                                                                                                                                                                                                                                                                                                                                                                                                                                                                                                                                                                                                                                                                                                                                                                                                                                                                                                                                                                                                                                                                                                                                                                                                                                                 |
|----------------|------------------------|--------------------------------------------------------------------------------------------------------------------------------------------------------------------------------------------------------------------------------------------------------------------------------------------------------------------------------------------------------------------------------------------------------------------------------------------------------------------------------------------------------------------------------------------------------------------------------------------------------------------------------------------------------------------------------------------------------------------------------------------------------------------------------------------------------------------------------------------------------------------------------------------------------------------------------------------------------------------------------------------------------------------------------------------------------------------------------------------------------------------------------------------------------------------------------------------------------------------------------------------------------------------------------------------------------------------------------------------------------------------------------------------------------------------------------------------------------------------------------------------------------------------------------------------------------------------------------------------------------------------------------------------------------------------------------------------------------------------------------------------------------------------------------------------------------------------------------------------------------------------------------------------------------------------------------------------------------------------------------------------------------------------------------------------------------------------------------------------------------------------------------------------------------------------------------------------------------------------------------------------------------------------------------------------------------------------------------------------------------------------------------------------------------------------------------------------------------------------------------------------------------------------------------------------|
| Intraoperative | Regional anesthesia    | <p>Standard clinical judgement of the multidisciplinary team (urologists, anesthesia) in concert with patient/family wishes should be used to offer regional catheter-based anesthesia to all patients. Options include wound soakers, transversus abdominis plane (TAP) catheters, quadratus lumborum (QL) catheters, erector spinae plane (ESP) catheters, or epidural. If planning wound soakers, TAP/QL/ESP catheters at the end of the case, preoperative TAP blocks performed by anesthesia using 0.2 mL/kg of 0.2–0.5% Ropivacaine should be injected on each side under ultrasound guidance. Wound soakers, TAP catheters, quadratus lumborum catheters or wound catheter pain pumps should be filled with 0.2% ropivacaine and connected to an epidural infusion pump to provide a continuous rate determined by the patient's weight (0.05 mL/kg/hr, maximum 0.5 mg/kg/hr). The infusion rate can be adjusted or stopped to monitor alternative analgesics prior to catheter removal.</p> <p>Epidurals can be run according to standard of care at each institution, although by protocol should not include a narcotic/opioid. Initial concentrations and rates for all regional anesthetic regimens will be documented. Duration of therapy will be documented.</p> <p>Wound soakers, TAP/QL/ESP catheters, and epidural catheters are to be left in place up to 5 days post-operatively or at clinical discretion of treating physicians within standard of care. They can be removed on day of discharge. Those left in longer than day 5 should have documented reason. Drainage around pain catheters can occur. This is normal. Dressings should be reinforced prior to scheduled removal. The risk of infection of pain catheters is generally small, but if concern exists, clinical judgement should be used as to the disposition of the pain catheters and documented.</p> <p>If none of the above are deemed clinically appropriate, bilateral transversus abdominis plane (TAP) blocks, caudal blocks or paravertebral blocks can be performed by the surgical or anesthesia team either through the surgical field or ultrasound guided. These do not count, however, for this protocol item given their limited duration of effectiveness for the patient. Blocks (as opposed to catheter-based postoperative therapies) do not provide continuous post-operative anesthesia to the wound beyond 6-12 hours. Justification of the use of blocks over other continuous regional options should be documented.</p> |
|                | Avoiding excess drains | <p>There is wide variability in the use of surgical drains by surgeons, according to local practice, experience and clinical scenario. Urologic reconstruction, though, typically requires drains in the form of catheters across newly-constructed catheterizable channels or catheters to drain the urinary tract to keep it under low pressure during healing. To meet this criterion, patients should not have a drain placed intraabdominally, in the space of Retzius, or subcutaneously. Acceptable catheters include: suprapubic tube, antegrade continence enema channel, appendicovesicostomy/ileovesicostomy/colovesicostomy, and/or urethral catheters. The duration of therapy will be according to surgeon preference.</p>                                                                                                                                                                                                                                                                                                                                                                                                                                                                                                                                                                                                                                                                                                                                                                                                                                                                                                                                                                                                                                                                                                                                                                                                                                                                                                                                                                                                                                                                                                                                                                                                                                                                                                                                                                                                   |

| Phase of case | Measure                       | Definition                                                                                                                                                                                                                                                                                                                                                                                                                                                                                                                                                                                                                                                                                                                                                                                                                                                                                                                                                                                                                                                                                                                                                                                                                                                                                                                                                                                                                                                                                                                                  |
|---------------|-------------------------------|---------------------------------------------------------------------------------------------------------------------------------------------------------------------------------------------------------------------------------------------------------------------------------------------------------------------------------------------------------------------------------------------------------------------------------------------------------------------------------------------------------------------------------------------------------------------------------------------------------------------------------------------------------------------------------------------------------------------------------------------------------------------------------------------------------------------------------------------------------------------------------------------------------------------------------------------------------------------------------------------------------------------------------------------------------------------------------------------------------------------------------------------------------------------------------------------------------------------------------------------------------------------------------------------------------------------------------------------------------------------------------------------------------------------------------------------------------------------------------------------------------------------------------------------|
|               | Euvolemia                     | <p>Hydration statuses of patients can vary greatly and are highly dependent on pre-operative fasting conditions, concomitant medical diagnoses like diabetes insipidus, and intraoperative fluid shifts related to insensible losses from an open abdomen, urine output and blood loss. Surgery involving the genitourinary tract can often be difficult because urine output cannot be recorded accurately throughout the case, which is often an indicator of fluid status and response to intraoperative intravenous fluid resuscitation. The goal is to maintain euvolemia and avoid bowel edema and subsequent ileus while maintaining safe cardiopulmonary function, end organ perfusion and offsetting bodily fluid and insensible losses.</p> <p>To meet this criterion, a goal of an average intravenous fluid volume between 3 and 7 mL/kg/hr as calculated according to the patient's preoperative weight and time from in room time to out of room time. Blood loss not requiring transfusion can be replenished in a 3:1 ratio of crystalloid to blood or 1:1 ratio of colloid to blood. Intravenous pressors should be considered to improve hemodynamics as opposed to fluid boluses. Some patients with preexisting comorbidities like diabetes insipidus may require greater than usual fluid volumes to maintain euvolemia. Such instances should be well-documented and justified.</p>                                                                                                                                   |
|               | Normothermia                  | <p>Patient's temperature should be maintained between 36°C to 38°C throughout the intraoperative period (skin-to-skin time). This can be done with a combination of warming blanket and/or alteration of the operating room environmental controls. To minimize variability, esophageal temperature monitoring should be used. Anesthesia record will be used to verify this item. Any value outside this range will not count.</p>                                                                                                                                                                                                                                                                                                                                                                                                                                                                                                                                                                                                                                                                                                                                                                                                                                                                                                                                                                                                                                                                                                         |
|               | Minimizing opioids            | <p>There is no well-accepted clinical standard for minimizing intraoperative opioids. Data gathered during a pilot study were used as a basis for this definition. Patients will have met this criterion if they receive &lt; 0.3 mg/kg IV morphine equivalents intraoperatively. This is equivalent to a total of 3.6 mcg/kg fentanyl IV. As a guideline for intraoperative opioid usage, providers may opt for no intraoperative opioids so long as the patient has some form of regional anesthesia on board starting at the beginning of the case and they show no signs of pain response. Alternatively, we recommend fentanyl may be administered in 1-2 mcg/kg doses with induction, prior to incision, and as deemed appropriate throughout the procedure by the anesthesiologist for analgesia. Opioids should only be used if clinically indicated. This total dosage equates to about 75% of mean post-operative day 0 IV morphine equivalent usage across all patients in the Phase I/II study. The last 25% of mean post-operative day 0 IV morphine equivalent is allocated toward post-operative pain control in the recovery unit or hospital ward.</p> <p>Patients should have their pain adequately controlled as necessary in accordance with standard of care. If pain assessments determine there is inadequate pain control, all pain pathway items should be reassessed by nursing, surgical and anesthesia teams to maximize pain control as best as possible in accordance to the ERAS pathway where possible.</p> |
|               | Minimally-invasive assistance | <p>Where technically and clinically feasible, surgeons should endeavor to perform part of the surgery with either laparoscopic or robotic assistance. In many cases, the cecum, appendix and terminal ileum can be mobilized into the pelvis to allow for reconstruction through a smaller muscle-splitting Pfannenstiel incision with minimization of time the peritoneum is open. This minimizes insensible fluid losses and fluid shifts. Surgeon judgement and experience will heavily influence this part of the pathway, but should be given consideration. If laparoscopic or robotic assistance is used in any part, this criterion will be met. Of note, this item is not meant to indicate that the entire operation need be done laparoscopically or robotically. Surgeon judgement is paramount.</p>                                                                                                                                                                                                                                                                                                                                                                                                                                                                                                                                                                                                                                                                                                                            |



| Phase of case        | Measure                                       | Definition                                                                                                                                                                                                                                                                                                                                                                                                                                                                                                                                                                                                                                                                                                                                                                                                                                                                                                                                                                                                                                       |
|----------------------|-----------------------------------------------|--------------------------------------------------------------------------------------------------------------------------------------------------------------------------------------------------------------------------------------------------------------------------------------------------------------------------------------------------------------------------------------------------------------------------------------------------------------------------------------------------------------------------------------------------------------------------------------------------------------------------------------------------------------------------------------------------------------------------------------------------------------------------------------------------------------------------------------------------------------------------------------------------------------------------------------------------------------------------------------------------------------------------------------------------|
|                      | No nasogastric tube on leaving operating room | No nasogastric (NG) tube shall be placed intraoperatively by the anesthesia team. An orogastric (OG) tube may be placed temporarily to drain stomach contents if felt necessary, but should be otherwise avoided. Placement of OG intraoperatively by definition must be removed at the end of surgery. Placement of NG tube on leaving the OR shall be documented and not qualify for this item. Patients who develop ileus and clinically require NG tube during the post-operative period still qualify for this item if no NG tube was used on leaving the OR. Such patients will require documentation of circumstances of secondary NG tube placement.                                                                                                                                                                                                                                                                                                                                                                                     |
| <b>Postoperative</b> | Nausea/vomiting prevention                    | Patients without clinical contraindications shall be written for weight-based anti-nausea prophylaxis, typically ondansetron to be given as needed on admission to the PACU or floor. Orders will be used to verify this item. Alternatives to ondansetron such as promethazine, diphenhydramine or a scopolamine patch may be used at the discretion of the ordering physician. Regimen will be documented.                                                                                                                                                                                                                                                                                                                                                                                                                                                                                                                                                                                                                                     |
|                      | Early feeding                                 | Patients should receive clear liquids on the evening of surgery (counted as postoperative day 0) and regular diet starting on day after surgery (postoperative day 1). Regular diet should have no restrictions outside of clinically-indicated patient needs (e.g., soft, bland, purée, etc.). Presence of orders to this effect on the specified days will be used to verify this item.                                                                                                                                                                                                                                                                                                                                                                                                                                                                                                                                                                                                                                                        |
|                      | Early mobilization                            | Patients should be out of bed in some fashion on post-operative day 1. This may include transfer to a chair, ambulation with or without assistance as deemed clinically safe and feasible by the surgical team and nursing staff. Patients who do not get out of bed will not have met this criterion. Similarly, sitting on the edge of the hospital bed is not considered sufficient to meet this criterion. Activity should be encouraged and increased each subsequent hospital day. Nursing documentation of activity will be used to verify this item.                                                                                                                                                                                                                                                                                                                                                                                                                                                                                     |
|                      | Adjunctive pain medication                    | Patients should be scheduled initially (not written prn or as needed) to receive a weight-based based dose of acetaminophen and/or NSAID therapy. These may be given orally or parenterally. To meet this item, these should be scheduled after surgery for 24 hours and can then be transitioned to as needed at the discretion of the care team. If these are written as needed on leaving the operating room, patient will not receive credit for this item. In accordance with clinical standard of care, patients who have contraindications to receiving either medication (e.g. allergy, liver disease, chronic kidney disease, etc.) should not be written for them.<br><br>Patients should have their pain adequately controlled as necessary in accordance with standard of care. If pain assessments determine there is inadequate pain control, all pain pathway items should be reassessed by nursing, surgical and anesthesia teams to maximize pain control as best as possible in accordance to the ERAS pathway where possible. |
|                      | Early stoppage of intravenous fluids          | Patients who have tolerated oral intake (no prerequisite amount is defined) and who are clinically stable according to standard of care should have their intravenous maintenance fluids turned off (saline locked) by post-operative day 2. "To Keep Open" or TKO rates are permissible. Patients who are not well, are vomiting, have ileus or have an NG tube should not have their IV fluids removed and will not meet this criterion.                                                                                                                                                                                                                                                                                                                                                                                                                                                                                                                                                                                                       |
|                      | Early removal of extra drains/catheters       | If no drain was left outside the urinary tract at the time of surgery, then the patient will automatically qualify for this ERAS protocol item. If a drain was left intentionally outside the urinary tract, then it should be removed by or on post-operative day 4. If there are clinical circumstances that require the drain be continued, then the clinical team should keep it in place and document reasoning.                                                                                                                                                                                                                                                                                                                                                                                                                                                                                                                                                                                                                            |

| Phase of case | Measure            | Definition                                                                                                                                                                                                                                                                                                                                                                                                                                                                                                                                                                                                                                                                                                                                                                                                                                                                                                                                                                                                                                                                                                                                                                                                                                                        |
|---------------|--------------------|-------------------------------------------------------------------------------------------------------------------------------------------------------------------------------------------------------------------------------------------------------------------------------------------------------------------------------------------------------------------------------------------------------------------------------------------------------------------------------------------------------------------------------------------------------------------------------------------------------------------------------------------------------------------------------------------------------------------------------------------------------------------------------------------------------------------------------------------------------------------------------------------------------------------------------------------------------------------------------------------------------------------------------------------------------------------------------------------------------------------------------------------------------------------------------------------------------------------------------------------------------------------|
|               | Minimizing opioids | <p>There is no well-accepted clinical standard for minimizing postoperative opioids. Data gathered during a pilot study were used as a basis for this definition in addition to prior study data regarding the decreased need for postoperative opioids in the setting of wound soakers. Patients will have met this criterion if they receive &lt; 0.15 mg/kg/day IV morphine equivalents averaged over the first 3 post-operative days. This equates to less than all the postoperative IV morphine equivalent usage for 11 of 13 patients in the pilot study, where nurses were informed to use opioids only for breakthrough pain control. This is equivalent to an average of 3 weight-appropriate doses of IV morphine, IV hydromorphone or oxycodone per day. Communication with nursing staff (day and night shift nurses) and anesthesia team is key to minimizing opioid usage.</p> <p>Patients should have their pain adequately controlled as necessary in accordance with standard of care. If pain assessments determine there is inadequate pain control, all pain pathway items should be reassessed by nursing, surgical and anesthesia teams to maximize pain control as best as possible in accordance to the ERAS pathway where possible.</p> |

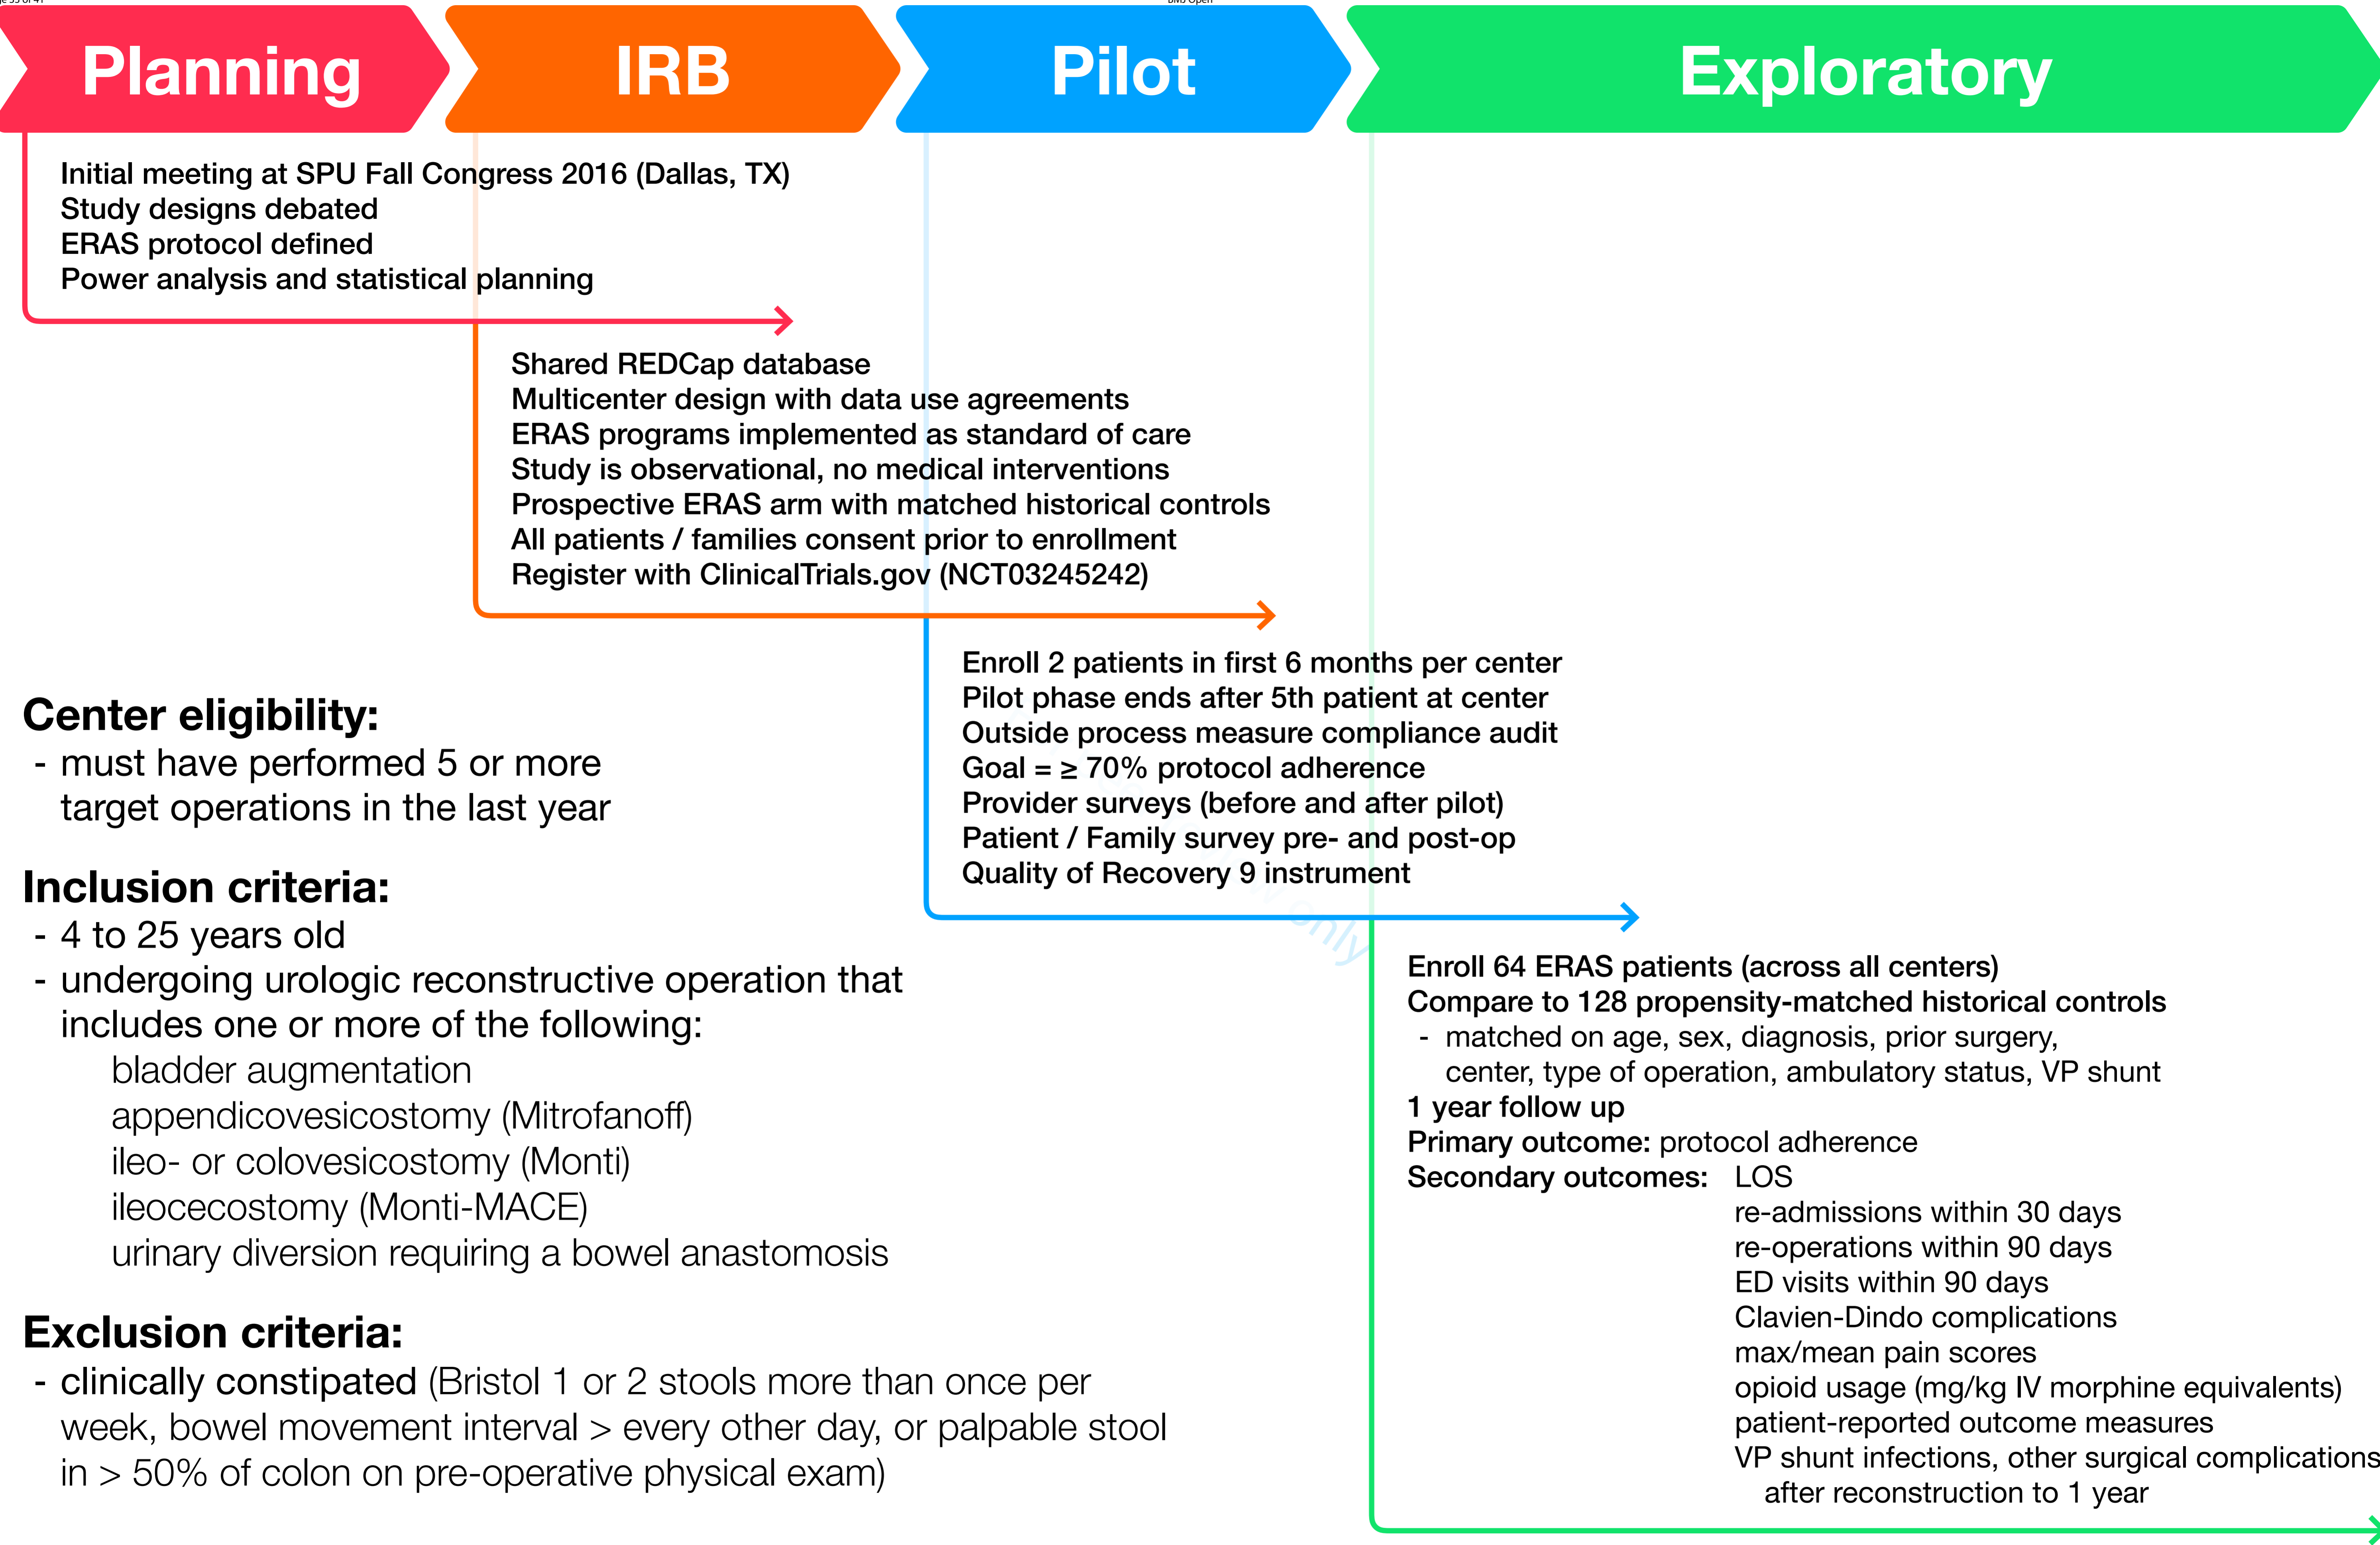

**Center eligibility:**

- must have performed 5 or more target operations in the last year

**Inclusion criteria:**

- 4 to 25 years old
- undergoing urologic reconstructive operation that includes one or more of the following:
  - bladder augmentation
  - appendicovesicostomy (Mitrofanoff)
  - ileo- or colovesicostomy (Monti)
  - ileocecostomy (Monti-MACE)
  - urinary diversion requiring a bowel anastomosis

**Exclusion criteria:**

- clinically constipated (Bristol 1 or 2 stools more than once per week, bowel movement interval > every other day, or palpable stool in > 50% of colon on pre-operative physical exam)

**Figure 1.** Overview of study conception, implementation, center eligibility, patient inclusion and exclusion criteria, and design methodology arrived at through group consensus.

For peer review only - <http://bmjopen.bmj.com/site/about/guidelines.xhtml>

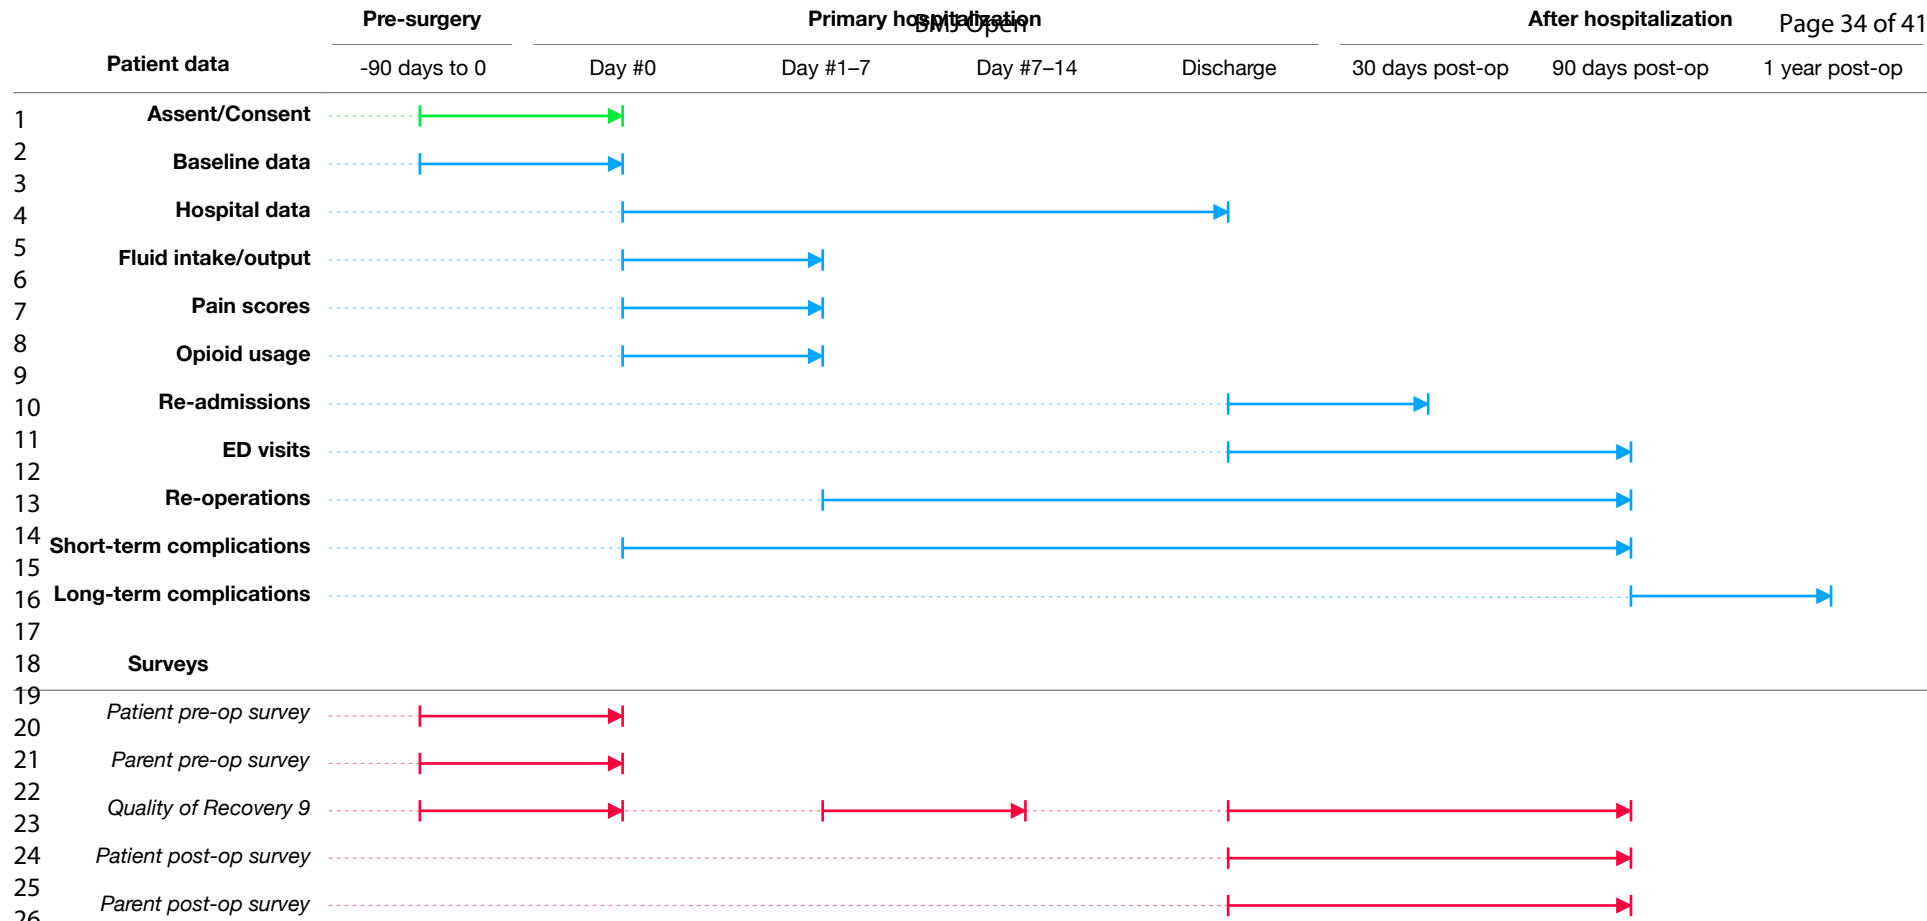

For peer review only - <http://bmjopen.bmj.com/site/about/guidelines.xhtml>

**Figure 2.** Timeline of patient enrollment, data collection including process and balancing measures, clinical outcomes, and patient-reported outcome measures during the PURSUE study.

# Reporting checklist for protocol of a clinical trial.

Based on the SPIRIT guidelines.

## Instructions to authors

Complete this checklist by entering the page numbers from your manuscript where readers will find each of the items listed below.

Your article may not currently address all the items on the checklist. Please modify your text to include the missing information. If you are certain that an item does not apply, please write "n/a" and provide a short explanation.

Upload your completed checklist as an extra file when you submit to a journal.

In your methods section, say that you used the SPIRIT reporting guidelines, and cite them as:

Chan A-W, Tetzlaff JM, Altman DG, Laupacis A, Gøtzsche PC, Krleža-Jerić K, Hróbjartsson A, Mann H, Dickersin K, Berlin J, Doré C, Parulekar W, Summerskill W, Groves T, Schulz K, Sox H, Rockhold FW, Rennie D, Moher D. SPIRIT 2013 Statement: Defining standard protocol items for clinical trials. *Ann Intern Med.* 2013;158(3):200-207

|                                   | Reporting Item                                                                                                                  | Page Number                                                                                          |
|-----------------------------------|---------------------------------------------------------------------------------------------------------------------------------|------------------------------------------------------------------------------------------------------|
| <b>Administrative information</b> |                                                                                                                                 |                                                                                                      |
| Title                             | <a href="#">#1</a> Descriptive title identifying the study design, population, interventions, and, if applicable, trial acronym | 1                                                                                                    |
| Trial registration                | <a href="#">#2a</a> Trial identifier and registry name. If not yet registered, name of intended registry                        | 2, 11, 16                                                                                            |
| Trial registration: data set      | <a href="#">#2b</a> All items from the World Health Organization Trial Registration Data Set                                    | n/a - these are all listed on the <a href="http://clinicaltrials.gov">clinicaltrials.gov</a> website |
| Protocol version                  | <a href="#">#3</a> Date and version identifier                                                                                  | 1                                                                                                    |
| Funding                           | <a href="#">#4</a> Sources and types of financial, material, and other support                                                  | 16                                                                                                   |
| Roles and responsibilities:       | <a href="#">#5a</a> Names, affiliations, and roles of protocol contributors                                                     | 16                                                                                                   |

1 contributorship

2 Roles and [#5b](#) Name and contact information for the trial n/a - this is an investigator-  
 3 responsibilities: sponsor initiated study  
 4 sponsor contact  
 5 information  
 6  
 7  
 8

9 Roles and [#5c](#) Role of study sponsor and funders, if any, in 16  
 10 responsibilities: study design; collection, management,  
 11 sponsor and funder analysis, and interpretation of data; writing of  
 12 the report; and the decision to submit the  
 13 report for publication, including whether they  
 14 will have ultimate authority over any of these  
 15 activities  
 16  
 17  
 18  
 19

20 Roles and [#5d](#) Composition, roles, and responsibilities of 16  
 21 responsibilities: the coordinating centre, steering committee,  
 22 committees endpoint adjudication committee, data  
 23 management team, and other individuals or  
 24 groups overseeing the trial, if applicable (see  
 25 Item 21a for data monitoring committee)  
 26  
 27  
 28  
 29

## 30 Introduction

31  
 32 Background and [#6a](#) Description of research question and 4  
 33 rationale justification for undertaking the trial,  
 34 including summary of relevant studies  
 35 (published and unpublished) examining  
 36 benefits and harms for each intervention  
 37  
 38  
 39  
 40

41 Background and [#6b](#) Explanation for choice of comparators 14  
 42 rationale: choice of  
 43 comparators  
 44  
 45

46 Objectives [#7](#) Specific objectives or hypotheses 9  
 47  
 48

49 Trial design [#8](#) Description of trial design including type of 6  
 50 trial (eg, parallel group, crossover, factorial,  
 51 single group), allocation ratio, and  
 52 framework (eg, superiority, equivalence, non-  
 53 inferiority, exploratory)  
 54  
 55  
 56

## 57 Methods: 58 Participants,

**interventions, and  
outcomes**

|    |                                    |                      |                                                                                                                                                                                                                                                                                                                                                                                |
|----|------------------------------------|----------------------|--------------------------------------------------------------------------------------------------------------------------------------------------------------------------------------------------------------------------------------------------------------------------------------------------------------------------------------------------------------------------------|
| 1  |                                    |                      |                                                                                                                                                                                                                                                                                                                                                                                |
| 2  |                                    |                      |                                                                                                                                                                                                                                                                                                                                                                                |
| 3  |                                    |                      |                                                                                                                                                                                                                                                                                                                                                                                |
| 4  | Study setting                      | <a href="#">#9</a>   | Description of study settings (eg, community clinic, academic hospital) and list of countries where data will be collected. Reference to where list of study sites can be obtained                                                                                                                                                                                             |
| 5  |                                    |                      |                                                                                                                                                                                                                                                                                                                                                                                |
| 6  |                                    |                      |                                                                                                                                                                                                                                                                                                                                                                                |
| 7  |                                    |                      |                                                                                                                                                                                                                                                                                                                                                                                |
| 8  |                                    |                      |                                                                                                                                                                                                                                                                                                                                                                                |
| 9  |                                    |                      |                                                                                                                                                                                                                                                                                                                                                                                |
| 10 |                                    |                      |                                                                                                                                                                                                                                                                                                                                                                                |
| 11 |                                    |                      |                                                                                                                                                                                                                                                                                                                                                                                |
| 12 | Eligibility criteria               | <a href="#">#10</a>  | Inclusion and exclusion criteria for participants. If applicable, eligibility criteria for study centres and individuals who will perform the interventions (eg, surgeons, psychotherapists)                                                                                                                                                                                   |
| 13 |                                    |                      |                                                                                                                                                                                                                                                                                                                                                                                |
| 14 |                                    |                      |                                                                                                                                                                                                                                                                                                                                                                                |
| 15 |                                    |                      |                                                                                                                                                                                                                                                                                                                                                                                |
| 16 |                                    |                      |                                                                                                                                                                                                                                                                                                                                                                                |
| 17 |                                    |                      |                                                                                                                                                                                                                                                                                                                                                                                |
| 18 |                                    |                      |                                                                                                                                                                                                                                                                                                                                                                                |
| 19 |                                    |                      |                                                                                                                                                                                                                                                                                                                                                                                |
| 20 | Interventions:<br>description      | <a href="#">#11a</a> | Interventions for each group with sufficient detail to allow replication, including how and when they will be administered                                                                                                                                                                                                                                                     |
| 21 |                                    |                      |                                                                                                                                                                                                                                                                                                                                                                                |
| 22 |                                    |                      |                                                                                                                                                                                                                                                                                                                                                                                |
| 23 |                                    |                      |                                                                                                                                                                                                                                                                                                                                                                                |
| 24 |                                    |                      |                                                                                                                                                                                                                                                                                                                                                                                |
| 25 |                                    |                      |                                                                                                                                                                                                                                                                                                                                                                                |
| 26 | Interventions:<br>modifications    | <a href="#">#11b</a> | Criteria for discontinuing or modifying allocated interventions for a given trial participant (eg, drug dose change in response to harms, participant request, or improving / worsening disease)                                                                                                                                                                               |
| 27 |                                    |                      |                                                                                                                                                                                                                                                                                                                                                                                |
| 28 |                                    |                      |                                                                                                                                                                                                                                                                                                                                                                                |
| 29 |                                    |                      |                                                                                                                                                                                                                                                                                                                                                                                |
| 30 |                                    |                      |                                                                                                                                                                                                                                                                                                                                                                                |
| 31 |                                    |                      |                                                                                                                                                                                                                                                                                                                                                                                |
| 32 |                                    |                      |                                                                                                                                                                                                                                                                                                                                                                                |
| 33 |                                    |                      |                                                                                                                                                                                                                                                                                                                                                                                |
| 34 | Interventions:<br>adherence        | <a href="#">#11c</a> | Strategies to improve adherence to intervention protocols, and any procedures for monitoring adherence (eg, drug tablet return; laboratory tests)                                                                                                                                                                                                                              |
| 35 |                                    |                      |                                                                                                                                                                                                                                                                                                                                                                                |
| 36 |                                    |                      |                                                                                                                                                                                                                                                                                                                                                                                |
| 37 |                                    |                      |                                                                                                                                                                                                                                                                                                                                                                                |
| 38 |                                    |                      |                                                                                                                                                                                                                                                                                                                                                                                |
| 39 |                                    |                      |                                                                                                                                                                                                                                                                                                                                                                                |
| 40 |                                    |                      |                                                                                                                                                                                                                                                                                                                                                                                |
| 41 | Interventions:<br>concomitant care | <a href="#">#11d</a> | Relevant concomitant care and interventions that are permitted or prohibited during the trial                                                                                                                                                                                                                                                                                  |
| 42 |                                    |                      | n/a - this is an observational study                                                                                                                                                                                                                                                                                                                                           |
| 43 |                                    |                      |                                                                                                                                                                                                                                                                                                                                                                                |
| 44 |                                    |                      |                                                                                                                                                                                                                                                                                                                                                                                |
| 45 |                                    |                      |                                                                                                                                                                                                                                                                                                                                                                                |
| 46 | Outcomes                           | <a href="#">#12</a>  | Primary, secondary, and other outcomes, including the specific measurement variable (eg, systolic blood pressure), analysis metric (eg, change from baseline, final value, time to event), method of aggregation (eg, median, proportion), and time point for each outcome. Explanation of the clinical relevance of chosen efficacy and harm outcomes is strongly recommended |
| 47 |                                    |                      |                                                                                                                                                                                                                                                                                                                                                                                |
| 48 |                                    |                      |                                                                                                                                                                                                                                                                                                                                                                                |
| 49 |                                    |                      |                                                                                                                                                                                                                                                                                                                                                                                |
| 50 |                                    |                      |                                                                                                                                                                                                                                                                                                                                                                                |
| 51 |                                    |                      |                                                                                                                                                                                                                                                                                                                                                                                |
| 52 |                                    |                      |                                                                                                                                                                                                                                                                                                                                                                                |
| 53 |                                    |                      |                                                                                                                                                                                                                                                                                                                                                                                |
| 54 |                                    |                      |                                                                                                                                                                                                                                                                                                                                                                                |
| 55 |                                    |                      |                                                                                                                                                                                                                                                                                                                                                                                |
| 56 |                                    |                      |                                                                                                                                                                                                                                                                                                                                                                                |
| 57 |                                    |                      |                                                                                                                                                                                                                                                                                                                                                                                |
| 58 |                                    |                      |                                                                                                                                                                                                                                                                                                                                                                                |
| 59 |                                    |                      |                                                                                                                                                                                                                                                                                                                                                                                |

|    |                           |                      |                                                |                                   |
|----|---------------------------|----------------------|------------------------------------------------|-----------------------------------|
| 1  | Participant timeline      | <a href="#">#13</a>  | Time schedule of enrolment, interventions      | 14                                |
| 2  |                           |                      | (including any run-ins and washouts),          |                                   |
| 3  |                           |                      | assessments, and visits for participants. A    |                                   |
| 4  |                           |                      | schematic diagram is highly recommended        |                                   |
| 5  |                           |                      | (see Figure)                                   |                                   |
| 6  |                           |                      |                                                |                                   |
| 7  |                           |                      |                                                |                                   |
| 8  |                           |                      |                                                |                                   |
| 9  | Sample size               | <a href="#">#14</a>  | Estimated number of participants needed to     | 14                                |
| 10 |                           |                      | achieve study objectives and how it was        |                                   |
| 11 |                           |                      | determined, including clinical and statistical |                                   |
| 12 |                           |                      | assumptions supporting any sample size         |                                   |
| 13 |                           |                      | calculations                                   |                                   |
| 14 |                           |                      |                                                |                                   |
| 15 |                           |                      |                                                |                                   |
| 16 |                           |                      |                                                |                                   |
| 17 | Recruitment               | <a href="#">#15</a>  | Strategies for achieving adequate participant  | 11                                |
| 18 |                           |                      | enrolment to reach target sample size          |                                   |
| 19 |                           |                      |                                                |                                   |
| 20 |                           |                      |                                                |                                   |
| 21 | <b>Methods:</b>           |                      |                                                |                                   |
| 22 | <b>Assignment of</b>      |                      |                                                |                                   |
| 23 | <b>interventions (for</b> |                      |                                                |                                   |
| 24 | <b>controlled trials)</b> |                      |                                                |                                   |
| 25 |                           |                      |                                                |                                   |
| 26 |                           |                      |                                                |                                   |
| 27 |                           |                      |                                                |                                   |
| 28 | Allocation:               | <a href="#">#16a</a> | Method of generating the allocation sequence   | n/a - not a randomized controlled |
| 29 | sequence generation       |                      | (eg, computer-generated random numbers),       | trial                             |
| 30 |                           |                      | and list of any factors for stratification. To |                                   |
| 31 |                           |                      | reduce predictability of a random sequence,    |                                   |
| 32 |                           |                      | details of any planned restriction (eg,        |                                   |
| 33 |                           |                      | blocking) should be provided in a separate     |                                   |
| 34 |                           |                      | document that is unavailable to those who      |                                   |
| 35 |                           |                      | enrol participants or assign interventions     |                                   |
| 36 |                           |                      |                                                |                                   |
| 37 |                           |                      |                                                |                                   |
| 38 |                           |                      |                                                |                                   |
| 39 |                           |                      |                                                |                                   |
| 40 |                           |                      |                                                |                                   |
| 41 | Allocation                | <a href="#">#16b</a> | Mechanism of implementing the allocation       | n/a - not a randomized controlled |
| 42 | concealment               |                      | sequence (eg, central telephone; sequentially  | trial                             |
| 43 | mechanism                 |                      | numbered, opaque, sealed envelopes),           |                                   |
| 44 |                           |                      | describing any steps to conceal the sequence   |                                   |
| 45 |                           |                      | until interventions are assigned               |                                   |
| 46 |                           |                      |                                                |                                   |
| 47 |                           |                      |                                                |                                   |
| 48 |                           |                      |                                                |                                   |
| 49 | Allocation:               | <a href="#">#16c</a> | Who will generate the allocation sequence,     | n/a - not a randomized controlled |
| 50 | implementation            |                      | who will enrol participants, and who will      | trial                             |
| 51 |                           |                      | assign participants to interventions           |                                   |
| 52 |                           |                      |                                                |                                   |
| 53 |                           |                      |                                                |                                   |
| 54 |                           |                      |                                                |                                   |
| 55 | Blinding (masking)        | <a href="#">#17a</a> | Who will be blinded after assignment to        | n/a - not a randomized controlled |
| 56 |                           |                      | interventions (eg, trial participants, care    | trial                             |
| 57 |                           |                      | providers, outcome assessors, data analysts),  |                                   |
| 58 |                           |                      |                                                |                                   |
| 59 |                           |                      |                                                |                                   |
| 60 |                           |                      |                                                |                                   |



and how

1  
2  
3 Blinding (masking): [#17b](#) If blinded, circumstances under which n/a - not a randomized controlled  
4 emergency unblinding is permissible, and procedure for trial  
5 unblinding revealing a participant's allocated  
6 intervention during the trial  
7  
8

9 **Methods: Data**  
10 **collection,**  
11 **management, and**  
12 **analysis**  
13  
14

15  
16 Data collection plan [#18a](#) Plans for assessment and collection of 14  
17 outcome, baseline, and other trial data,  
18 including any related processes to promote  
19 data quality (eg, duplicate measurements,  
20 training of assessors) and a description of  
21 study instruments (eg, questionnaires,  
22 laboratory tests) along with their reliability  
23 and validity, if known. Reference to where  
24 data collection forms can be found, if not in  
25 the protocol  
26  
27  
28  
29  
30

31  
32 Data collection [#18b](#) Plans to promote participant retention and 14  
33 plan: retention complete follow-up, including list of any  
34 outcome data to be collected for participants  
35 who discontinue or deviate from intervention  
36 protocols  
37  
38  
39

40 Data management [#19](#) Plans for data entry, coding, security, and 14  
41 storage, including any related processes to  
42 promote data quality (eg, double data entry;  
43 range checks for data values). Reference to  
44 where details of data management procedures  
45 can be found, if not in the protocol  
46  
47  
48  
49

50 Statistics: outcomes [#20a](#) Statistical methods for analysing primary and 14-15  
51 secondary outcomes. Reference to where  
52 other details of the statistical analysis plan  
53 can be found, if not in the protocol  
54  
55

56  
57 Statistics: additional [#20b](#) Methods for any additional analyses (eg, 14-15  
58 analyses subgroup and adjusted analyses)  
59

|    |                      |                      |                                                   |       |
|----|----------------------|----------------------|---------------------------------------------------|-------|
| 1  | Statistics: analysis | <a href="#">#20c</a> | Definition of analysis population relating to     | 14    |
| 2  | population and       |                      | protocol non-adherence (eg, as randomised         |       |
| 3  | missing data         |                      | analysis), and any statistical methods to         |       |
| 4  |                      |                      | handle missing data (eg, multiple imputation)     |       |
| 5  |                      |                      |                                                   |       |
| 6  |                      |                      |                                                   |       |
| 7  |                      |                      |                                                   |       |
| 8  | <b>Methods:</b>      |                      |                                                   |       |
| 9  | <b>Monitoring</b>    |                      |                                                   |       |
| 10 |                      |                      |                                                   |       |
| 11 | Data monitoring:     | <a href="#">#21a</a> | Composition of data monitoring committee          | 15-16 |
| 12 | formal committee     |                      | (DMC); summary of its role and reporting          |       |
| 13 |                      |                      | structure; statement of whether it is             |       |
| 14 |                      |                      | independent from the sponsor and competing        |       |
| 15 |                      |                      | interests; and reference to where further         |       |
| 16 |                      |                      | details about its charter can be found, if not in |       |
| 17 |                      |                      | the protocol. Alternatively, an explanation of    |       |
| 18 |                      |                      | why a DMC is not needed                           |       |
| 19 |                      |                      |                                                   |       |
| 20 |                      |                      |                                                   |       |
| 21 |                      |                      |                                                   |       |
| 22 |                      |                      |                                                   |       |
| 23 |                      |                      |                                                   |       |
| 24 | Data monitoring:     | <a href="#">#21b</a> | Description of any interim analyses and           | 15    |
| 25 | interim analysis     |                      | stopping guidelines, including who will have      |       |
| 26 |                      |                      | access to these interim results and make the      |       |
| 27 |                      |                      | final decision to terminate the trial             |       |
| 28 |                      |                      |                                                   |       |
| 29 |                      |                      |                                                   |       |
| 30 |                      |                      |                                                   |       |
| 31 | Harms                | <a href="#">#22</a>  | Plans for collecting, assessing, reporting, and   | 13    |
| 32 |                      |                      | managing solicited and spontaneously              |       |
| 33 |                      |                      | reported adverse events and other unintended      |       |
| 34 |                      |                      | effects of trial interventions or trial conduct   |       |
| 35 |                      |                      |                                                   |       |
| 36 |                      |                      |                                                   |       |
| 37 |                      |                      |                                                   |       |
| 38 | Auditing             | <a href="#">#23</a>  | Frequency and procedures for auditing trial       | 15-16 |
| 39 |                      |                      | conduct, if any, and whether the process will     |       |
| 40 |                      |                      | be independent from investigators and the         |       |
| 41 |                      |                      | sponsor                                           |       |
| 42 |                      |                      |                                                   |       |
| 43 |                      |                      |                                                   |       |
| 44 |                      |                      |                                                   |       |
| 45 | <b>Ethics and</b>    |                      |                                                   |       |
| 46 | <b>dissemination</b> |                      |                                                   |       |
| 47 |                      |                      |                                                   |       |
| 48 |                      |                      |                                                   |       |
| 49 | Research ethics      | <a href="#">#24</a>  | Plans for seeking research ethics committee /     | 17    |
| 50 | approval             |                      | institutional review board (REC / IRB)            |       |
| 51 |                      |                      | approval                                          |       |
| 52 |                      |                      |                                                   |       |
| 53 |                      |                      |                                                   |       |
| 54 | Protocol             | <a href="#">#25</a>  | Plans for communicating important protocol        | 17    |
| 55 | amendments           |                      | modifications (eg, changes to eligibility         |       |
| 56 |                      |                      | criteria, outcomes, analyses) to relevant         |       |
| 57 |                      |                      | parties (eg, investigators, REC / IRBs, trial     |       |
| 58 |                      |                      |                                                   |       |
| 59 |                      |                      |                                                   |       |
| 60 |                      |                      |                                                   |       |

|    |                       |                                                                      |                                     |
|----|-----------------------|----------------------------------------------------------------------|-------------------------------------|
| 1  |                       | participants, trial registries, journals,                            |                                     |
| 2  |                       | regulators)                                                          |                                     |
| 3  |                       |                                                                      |                                     |
| 4  | Consent or assent     | <a href="#">#26a</a> Who will obtain informed consent or assent      | 17                                  |
| 5  |                       | from potential trial participants or authorised                      |                                     |
| 6  |                       | surrogates, and how (see Item 32)                                    |                                     |
| 7  |                       |                                                                      |                                     |
| 8  |                       |                                                                      |                                     |
| 9  | Consent or assent:    | <a href="#">#26b</a> Additional consent provisions for collection    | n/a - no additional collection of   |
| 10 | ancillary studies     | and use of participant data and biological                           | biological specimens is stipulated  |
| 11 |                       | specimens in ancillary studies, if applicable                        | as part of this observational study |
| 12 |                       |                                                                      |                                     |
| 13 |                       |                                                                      |                                     |
| 14 | Confidentiality       | <a href="#">#27</a> How personal information about potential         | 14                                  |
| 15 |                       | and enrolled participants will be collected,                         |                                     |
| 16 |                       | shared, and maintained in order to protect                           |                                     |
| 17 |                       | confidentiality before, during, and after the                        |                                     |
| 18 |                       | trial                                                                |                                     |
| 19 |                       |                                                                      |                                     |
| 20 |                       |                                                                      |                                     |
| 21 |                       |                                                                      |                                     |
| 22 |                       |                                                                      |                                     |
| 23 | Declaration of        | <a href="#">#28</a> Financial and other competing interests for      | 18                                  |
| 24 | interests             | principal investigators for the overall trial and                    |                                     |
| 25 |                       | each study site                                                      |                                     |
| 26 |                       |                                                                      |                                     |
| 27 |                       |                                                                      |                                     |
| 28 | Data access           | <a href="#">#29</a> Statement of who will have access to the final   | 14                                  |
| 29 |                       | trial dataset, and disclosure of contractual                         |                                     |
| 30 |                       | agreements that limit such access for                                |                                     |
| 31 |                       | investigators                                                        |                                     |
| 32 |                       |                                                                      |                                     |
| 33 |                       |                                                                      |                                     |
| 34 |                       |                                                                      |                                     |
| 35 | Ancillary and post    | <a href="#">#30</a> Provisions, if any, for ancillary and post-trial | n/a - given the observational       |
| 36 | trial care            | care, and for compensation to those who                              | nature of this study and            |
| 37 |                       | suffer harm from trial participation                                 | implementation of ERAS as           |
| 38 |                       |                                                                      | standard of care, any adverse       |
| 39 |                       |                                                                      | clinical outcomes are deemed        |
| 40 |                       |                                                                      | expected as part of the course of   |
| 41 |                       |                                                                      | treatment and not the study itself  |
| 42 |                       |                                                                      |                                     |
| 43 |                       |                                                                      |                                     |
| 44 |                       |                                                                      |                                     |
| 45 |                       |                                                                      |                                     |
| 46 | Dissemination         | <a href="#">#31a</a> Plans for investigators and sponsor to          | 17                                  |
| 47 | policy: trial results | communicate trial results to participants,                           |                                     |
| 48 |                       | healthcare professionals, the public, and other                      |                                     |
| 49 |                       | relevant groups (eg, via publication, reporting                      |                                     |
| 50 |                       | in results databases, or other data sharing                          |                                     |
| 51 |                       | arrangements), including any publication                             |                                     |
| 52 |                       | restrictions                                                         |                                     |
| 53 |                       |                                                                      |                                     |
| 54 |                       |                                                                      |                                     |
| 55 |                       |                                                                      |                                     |
| 56 |                       |                                                                      |                                     |
| 57 | Dissemination         | <a href="#">#31b</a> Authorship eligibility guidelines and any       | 17                                  |
| 58 |                       |                                                                      |                                     |
| 59 |                       |                                                                      |                                     |
| 60 |                       |                                                                      |                                     |

|   |                      |                      |                                                  |                                    |
|---|----------------------|----------------------|--------------------------------------------------|------------------------------------|
| 1 | policy: authorship   |                      | intended use of professional writers             |                                    |
| 2 | Dissemination        | <a href="#">#31c</a> | Plans, if any, for granting public access to the | n/a - there are currently no plans |
| 3 | policy: reproducible |                      | full protocol, participant-level dataset, and    | for public sharing of the data set |
| 4 | research             |                      | statistical code                                 |                                    |

## 8 Appendices

|    |                  |                     |                                                   |                                     |
|----|------------------|---------------------|---------------------------------------------------|-------------------------------------|
| 9  |                  |                     |                                                   |                                     |
| 10 | Informed consent | <a href="#">#32</a> | Model consent form and other related              | 17                                  |
| 11 | materials        |                     | documentation given to participants and           |                                     |
| 12 |                  |                     | authorised surrogates                             |                                     |
| 13 |                  |                     |                                                   |                                     |
| 14 |                  |                     |                                                   |                                     |
| 15 | Biological       | <a href="#">#33</a> | Plans for collection, laboratory evaluation,      | n/a - none are collected as part of |
| 16 | specimens        |                     | and storage of biological specimens for           | the study                           |
| 17 |                  |                     | genetic or molecular analysis in the current      |                                     |
| 18 |                  |                     | trial and for future use in ancillary studies, if |                                     |
| 19 |                  |                     | applicable                                        |                                     |
| 20 |                  |                     |                                                   |                                     |
| 21 |                  |                     |                                                   |                                     |
| 22 |                  |                     |                                                   |                                     |

### 24 Notes:

- 25
  - 26 • 2b: n/a - these are all listed on the [clinicaltrials.gov](http://clinicaltrials.gov) website
  - 27
  - 28 • 5b: n/a - this is an investigator-initiated study
  - 29
  - 30
  - 31 • 11d: n/a - this is an observational study
  - 32
  - 33 • 16a: n/a - not a randomized controlled trial
  - 34
  - 35 • 16b: n/a - not a randomized controlled trial
  - 36
  - 37 • 16c: n/a - not a randomized controlled trial
  - 38
  - 39 • 17a: n/a - not a randomized controlled trial
  - 40
  - 41 • 17b: n/a - not a randomized controlled trial
  - 42
  - 43
  - 44 • 26b: n/a - no additional collection of biological specimens is stipulated as part of this observational study
  - 45
  - 46 • 30: n/a - given the observational nature of this study and implementation of ERAS as standard of care, any
  - 47
  - 48
  - 49
  - 50
  - 51 • 31c: n/a - there are currently no plans for public sharing of the data set
  - 52
  - 53 • 33: n/a - none are collected as part of the study The SPIRIT checklist is distributed under the terms of the
  - 54
  - 55
  - 56
  - 57
  - 58
  - 59
  - 60
- 56 using <https://www.goodreports.org/>, a tool made by the [EQUATOR Network](#) in collaboration with
- 57 [Penelope.ai](#)

# BMJ Open

## Design and Development of the Pediatric Urology Recovery After Surgery Endeavor (PURSUE) Multi-Center Pilot and Exploratory Study

|                                 |                                                                                                                                                                                                                                                                                                                                                                                                                                                                                                                                                                                                                                                                                                                                                                                                                                                                                                                                                                                                                                                                                                                                                                                                                                                                                                                                                     |
|---------------------------------|-----------------------------------------------------------------------------------------------------------------------------------------------------------------------------------------------------------------------------------------------------------------------------------------------------------------------------------------------------------------------------------------------------------------------------------------------------------------------------------------------------------------------------------------------------------------------------------------------------------------------------------------------------------------------------------------------------------------------------------------------------------------------------------------------------------------------------------------------------------------------------------------------------------------------------------------------------------------------------------------------------------------------------------------------------------------------------------------------------------------------------------------------------------------------------------------------------------------------------------------------------------------------------------------------------------------------------------------------------|
| Journal:                        | <i>BMJ Open</i>                                                                                                                                                                                                                                                                                                                                                                                                                                                                                                                                                                                                                                                                                                                                                                                                                                                                                                                                                                                                                                                                                                                                                                                                                                                                                                                                     |
| Manuscript ID                   | bmjopen-2020-039035.R1                                                                                                                                                                                                                                                                                                                                                                                                                                                                                                                                                                                                                                                                                                                                                                                                                                                                                                                                                                                                                                                                                                                                                                                                                                                                                                                              |
| Article Type:                   | Protocol                                                                                                                                                                                                                                                                                                                                                                                                                                                                                                                                                                                                                                                                                                                                                                                                                                                                                                                                                                                                                                                                                                                                                                                                                                                                                                                                            |
| Date Submitted by the Author:   | 01-Oct-2020                                                                                                                                                                                                                                                                                                                                                                                                                                                                                                                                                                                                                                                                                                                                                                                                                                                                                                                                                                                                                                                                                                                                                                                                                                                                                                                                         |
| Complete List of Authors:       | Rove, Kyle; Children's Hospital Colorado, Department of Pediatric Urology; University of Colorado, Department of Surgery, Division of Urology<br>Strine, Andrew; Cincinnati Children's Hospital Medical Center, Division of Pediatric Urology<br>Wilcox, Duncan; Children's Hospital Colorado, Department of Pediatric Urology; University of Colorado, Department of Surgery, Division of Urology<br>Vricella, Gino; St. Louis Children's Hospital, Division of Pediatric Urology; Washington University in Saint Louis School of Medicine, Department of Surgery, Division of Urology<br>Welch, Timothy; St. Louis Children's Hospital, Department of Anesthesiology; Washington University in Saint Louis School of Medicine, Department of Surgery, Division of Urology<br>VanderBrink, Brian; Cincinnati Children's Hospital Medical Center, Division of Pediatric Urology<br>Chu, David; Ann and Robert H Lurie Children's Hospital of Chicago, Division of Urology<br>Chaudhry, Rajeev; Children's Hospital of Pittsburgh of University of Pittsburgh Medical Center, Division of Pediatric Urology<br>Zee, Rebecca; Children's Hospital of Richmond at VCU, Division of Urology<br>Group, PURSUE Study<br>Brockel, Megan ; Children's Hospital Colorado, Department of Anesthesiology; University of Colorado, Department of Anesthesiology |
| <b>Primary Subject Heading</b>: | Urology                                                                                                                                                                                                                                                                                                                                                                                                                                                                                                                                                                                                                                                                                                                                                                                                                                                                                                                                                                                                                                                                                                                                                                                                                                                                                                                                             |
| Secondary Subject Heading:      | Anaesthesia, Paediatrics, Surgery                                                                                                                                                                                                                                                                                                                                                                                                                                                                                                                                                                                                                                                                                                                                                                                                                                                                                                                                                                                                                                                                                                                                                                                                                                                                                                                   |
| Keywords:                       | Bladder disorders < UROLOGY, Pain management < ANAESTHETICS, Paediatric urology < PAEDIATRIC SURGERY, Urinary incontinences < UROLOGY, Quality in health care < HEALTH SERVICES ADMINISTRATION & MANAGEMENT                                                                                                                                                                                                                                                                                                                                                                                                                                                                                                                                                                                                                                                                                                                                                                                                                                                                                                                                                                                                                                                                                                                                         |
|                                 |                                                                                                                                                                                                                                                                                                                                                                                                                                                                                                                                                                                                                                                                                                                                                                                                                                                                                                                                                                                                                                                                                                                                                                                                                                                                                                                                                     |

1  
2  
3  
4  
5  
6  
7  
8  
9  
10  
11  
12  
13  
14  
15  
16  
17  
18  
19  
20  
21  
22  
23  
24  
25  
26  
27  
28  
29  
30  
31  
32  
33  
34  
35  
36  
37  
38  
39  
40  
41  
42  
43  
44  
45  
46  
47  
48  
49  
50  
51  
52  
53  
54  
55  
56  
57  
58  
59  
60

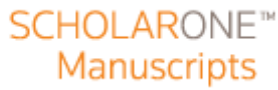



I, the Submitting Author has the right to grant and does grant on behalf of all authors of the Work (as defined in the below author licence), an exclusive licence and/or a non-exclusive licence for contributions from authors who are: i) UK Crown employees; ii) where BMJ has agreed a CC-BY licence shall apply, and/or iii) in accordance with the terms applicable for US Federal Government officers or employees acting as part of their official duties; on a worldwide, perpetual, irrevocable, royalty-free basis to BMJ Publishing Group Ltd ("BMJ") its licensees and where the relevant Journal is co-owned by BMJ to the co-owners of the Journal, to publish the Work in this journal and any other BMJ products and to exploit all rights, as set out in our [licence](#).

The Submitting Author accepts and understands that any supply made under these terms is made by BMJ to the Submitting Author unless you are acting as an employee on behalf of your employer or a postgraduate student of an affiliated institution which is paying any applicable article publishing charge ("APC") for Open Access articles. Where the Submitting Author wishes to make the Work available on an Open Access basis (and intends to pay the relevant APC), the terms of reuse of such Open Access shall be governed by a Creative Commons licence – details of these licences and which [Creative Commons](#) licence will apply to this Work are set out in our licence referred to above.

Other than as permitted in any relevant BMJ Author's Self Archiving Policies, I confirm this Work has not been accepted for publication elsewhere, is not being considered for publication elsewhere and does not duplicate material already published. I confirm all authors consent to publication of this Work and authorise the granting of this licence.

# Design and Development of the Pediatric Urology Recovery After Surgery Endeavor (PURSUE) Multi-Center Pilot and Exploratory Study

**Kyle O. Rove MD<sup>‡</sup>, Andrew C. Strine MD<sup>§</sup>, Duncan T. Wilcox MD MBBS<sup>‡</sup>, Gino J. Vricella MD<sup>□</sup>, Timothy P. Welch MD<sup>¶</sup>, Brian VanderBrink MD<sup>§</sup>, David I. Chu MD MSCE<sup>△</sup>, Rajeev Chaudhry MD<sup>b</sup>, Rebecca S. Zee, MD<sup>c</sup>, PURSUE Study Group, Megan A. Brockel MD<sup>a</sup>**

## *Corresponding author for proofs and reprints:*

<sup>‡</sup> Kyle O. Rove, MD  
Assistant Professor  
Children's Hospital Colorado  
University of Colorado School of Medicine  
13123 E. 16th Ave, B-463  
Aurora, CO 80045  
USA  
720-777-1234  
kyle.rove@childrenscolorado.org

## *Coauthors addresses:*

<sup>§</sup> Division of Pediatric Urology, Cincinnati Children's, Cincinnati, Ohio, USA

<sup>‡</sup> Department of Pediatric Urology, Children's Hospital Colorado, University of Colorado, Aurora, CO, USA

<sup>□</sup> Division of Pediatric Urology, St. Louis Children's Hospital, Washington University in St. Louis, St. Louis, MO, USA

<sup>¶</sup> Department of Anesthesiology, St. Louis Children's Hospital, Washington University in St. Louis, St. Louis, MO, USA

<sup>△</sup> Division of Urology, Ann & Robert H. Lurie Children's Hospital of Chicago, Chicago, IL, USA

<sup>b</sup> Division of Pediatric Urology, Children's Hospital of Pittsburgh, University of Pittsburgh Medical Center, Pittsburgh, PA, USA

<sup>c</sup> Division of Urology, Children's Hospital of Richmond at VCU, Richmond, VA, USA

<sup>a</sup> Department of Anesthesiology, Children's Hospital Colorado, University of Colorado, Aurora, CO, USA

**Abstract word count:** 299 words (300 word limit)

**Body word count:** 4,067 words (4,000 word limit)

**Keywords:** enhanced recovery after surgery, bladder augmentation, Mitrofanoff, urinary diversion, protocol



## Abstract

### Introduction:

Lower urinary tract reconstruction in pediatric urology represent a physiologically-stressful event that is associated with high complication rates, including readmissions and emergency room visits. Enhanced Recovery After Surgery (ERAS) protocol is a set of multidisciplinary, perioperative strategies designed to expedite surgical recovery without adversely impacting readmission or reoperation rates. Early pediatric urology data demonstrated ERAS reduced complications in this population.

### Methods and Analysis:

In 2016, a working group of pediatric urologists and anesthesiologists convened to develop an ERAS protocol suitable for patients undergoing lower urinary tract reconstruction and define study process measures, patient-reported outcomes, and clinically-relevant outcomes in pediatric and adolescent/young adult patients.

A multicenter, prospective, propensity-matched, case control study design was chosen. Each center will enroll five pilot patients to verify implementation. Subsequent enrolled patients will be propensity matched to historical controls. Eligible patients must be aged 4 to 25 years and undergoing planned operations (bladder augmentation, continent ileovesicostomy or appendicovesicostomy, or urinary diversion). 64 ERAS patients and 128 controls will be needed to detect a decrease in mean length of stay by two days.

Pilot phase outcomes include attainment of  $\geq 70\%$  mean protocol adherence per patient and reasons for protocol deviations. Exploratory phase primary outcome is ERAS protocol adherence, with secondary outcomes including length of stay, readmissions, reoperations, emergency room visits, 90-day complications, pain scores, opioid usage, and differences in Quality of Recovery 9 scores.

### Ethics and Dissemination:

This study has been registered with authors' respective institution review boards and will be published in peer-reviewed journals. It will provide robust insight into the feasibility of ERAS in pediatric urology, determine patient outcomes, and allow for iteration of ERAS implementations as new best practices and evidence for pediatric surgical care arise. We anticipate this study will take 4 years to fully accrue with completed follow up.

### Registration Details:

Pediatric Urology Recovery After Surgery Endeavor (PURSUE, ClinicalTrials.gov NCT03245242) is a multicenter, prospective, case-control study that will examine outcomes in pediatric and adolescent/young adult patients undergoing lower urinary tract reconstructive operations who receive care under an ERAS pathway.

## Article Summary

### Strengths and Limitations of This Study

- This protocol outlines a multicenter, prospective propensity score-matched cohort study of an Enhanced Recovery After Surgery (ERAS) protocol applied to pediatric and adolescent/young adult patients undergoing lower urinary tract reconstructive surgery.

Rove, Strine, Wilcox, Vricella, Welch,  
VanderBrink, Chu, Chaudhry, Zee, PURSUE, Brockel

Design Considerations for PURSUE Study

- Each participating free-standing pediatric center will take part in a pilot phase to understand barriers to implementation, protocol compliance, and protocol uptake and an exploratory phase to demonstrate clinical outcomes related to the ERAS care pathway as compared to propensity matched recent historical controls.
- Primary and secondary outcomes of interest are relevant to the underlying quality improvement initiative to implement a standardized care pathway (ERAS), reflect clinical outcomes, and include patient-reported outcome measures to understand the patient and family perspective.
- The comparator group will be recent historical patients who have undergone the same operations. Propensity score matching based on *a priori* identified covariates will be used to reduce confounding based on non-random assignment of perioperative care (e.g., routine care versus ERAS protocol). Time-series analysis will provide insight into any ongoing changes occurring over time with regards to either process, clinical, or balancing measures.

# Introduction

## Background

Lower urinary tract reconstruction represents some of the most challenging surgical operations performed by pediatric urologists. These operations can be long, complex, and often involve a bowel resection and anastomosis. Patients undergoing these operations are at high risk for postoperative complications, including nausea and vomiting, ileus, surgical site infection, urinary tract infection, and pyelonephritis.[1] To date, the optimal perioperative care for these patients has not been well-defined, with practices varying widely from institution to institution.[2,3]

## Relevance

Since its initial description in the late 1990s, enhanced recovery after surgery (ERAS) has emerged as an innovative tool in the care of adult surgical patients. ERAS represents a multidisciplinary protocol with a strong implementation framework that targets all phases of care for the surgical patient.[4] ERAS has been shown in various adult surgical populations to maintain adequate pain control and facilitate earlier return to baseline function without adverse impact on complication or readmission rate through evidence-based care.[5-7] A large multicenter ERAS study of adult colorectal resection and hip fracture repairs demonstrated clinically-significant reductions in length of stay (0.4–0.9 days), postoperative major complications (rate ratio 0.28 compared to pre-ERAS controls [95% confidence interval 0.12–0.68]), and decreased opioid use (by 31–42%).[7] Data audits function as an essential part of an ERAS protocol, allowing teams to review compliance and use continuous quality improvement methodology to iterate and target areas requiring amelioration, further improving clinical outcomes.[8]

Standardizing perioperative care of complex pediatric urology patients using an

1  
2  
3 approach like ERAS has potential to reduce undesirable variations in care, optimize  
4 recovery, and lead to improvements in surgical outcomes.[9]  
5  
6  
7

8  
9 To date, experience with ERAS in pediatric patients has been limited. Published studies  
10 have methodological limitations including retrospective nature, lack of specified  
11 inclusion and exclusion criteria, poorly defined ERAS protocol elements, small sample  
12 size, lack of audits, and/or limited follow up.[10,11] A single-center, prospective pilot trial  
13 of 13 pediatric urology patients undergoing procedures with ERAS, compared to 26  
14 historical controls, demonstrated fewer complications and reduced length of stay from 8  
15 to 5.7 days.[12] Another group studying a similar population retrospectively reported  
16 even greater improvements in length of stay.[13] These small experiences reflect that  
17 some pediatric operations occur with far less frequency than common adult operations,  
18 increasing variability in postoperative care and overall experience from center to center  
19 and surgeon to surgeon. The evidence base for perioperative practices are not  
20 necessarily well developed or even valid in a pediatric population. Additionally, parents,  
21 guardians and families are integral to the care of pediatric surgical patients and their  
22 involvement in a pathway should be considered.[11]  
23  
24  
25  
26  
27  
28  
29  
30  
31  
32  
33  
34  
35  
36  
37  
38  
39  
40  
41

### 42 **Anticipated Impact**

43 To address these issues, a collaborative multicenter effort was initiated by the study  
44 authors with goals of defining and implementing an ERAS protocol adapted for pediatric  
45 urology patients and studying both implementation and outcomes prospectively.  
46 Centers will gain valuable experience in implementation, which requires stakeholder  
47 engagement and multidisciplinary participation, while the study group seeks to  
48 understand system, provider, and patient-level barriers to protocolized surgical care.  
49  
50  
51  
52  
53  
54  
55  
56  
57  
58

1  
2  
3 Furthermore, study of ERAS in a pediatric and emerging young adult population  
4  
5 undergoing metabolically stressful operations has the potential to demonstrate the value  
6  
7 of standardized care similar to gains seen in adult counterparts.  
8  
9

## 10 **Objectives**

11 Pediatric Urology Recovery After Surgery Endeavor (PURSUE) study has two primary  
12  
13 objectives: 1, to determine if an ERAS protocol can decrease variation in care for  
14  
15 complex pediatric patients while simultaneously improving recovery time from surgery  
16  
17 without any change in balancing measures, and 2, to broaden exposure of the pediatric  
18  
19 urology community to ERAS by engaging study centers in ERAS protocol  
20  
21 implementation at geographically-diverse medical centers. In this report, we describe  
22  
23 study design considerations, ERAS protocol definitions, and rationale for the PURSUE  
24  
25 study.  
26  
27  
28  
29  
30  
31

## 32 **Methods and Analysis**

### 33 **ERAS Protocol Development**

34 The study group first met to discuss the proposal for a multicenter study at The  
35  
36 Societies for Pediatric Urology Fall Congress in September 2016 in Dallas, Texas, USA.  
37  
38 Follow up phone conferences were held several times over the following year. The  
39  
40 participants at the initial meeting included attendings, fellows, and residents from  
41  
42 pediatric urology and pediatric anesthesiology. Six institutions participated in the original  
43  
44 discussions and committed to the study (represented by the authors).  
45  
46  
47  
48  
49

50 Prior to this work, the study group was only aware of a single pediatric urology ERAS  
51  
52 protocol that was adapted for use in patients predominantly with neurogenic bowel and  
53  
54 bladder (e.g., myelomeningocele).[12] This was used as a starting point and was similar  
55  
56  
57

1  
2  
3 to existing adult urology ERAS protocols for radical cystectomy.[14] Modification and  
4 addition to this protocol were arrived at by literature review and group consensus.  
5  
6 Highlights of the original protocol include omission of formal preoperative bowel  
7 preparation, multimodal analgesia with regional blocks for all, no nasogastric tube  
8 postoperatively, early feeding (clear liquids in evening after leaving operating room,  
9 regular diet following day), and early discontinuation of intravenous fluids by  
10  
11 postoperative day 2. **Table 1** lists all 20 ERAS protocol elements defined for the  
12  
13 purpose of this study.  
14  
15  
16  
17  
18  
19  
20  
21

22 The authors identified several important components to add to the original pilot protocol,  
23 including ensuring a preoperative clear liquid complex carbohydrate load up to 2 hours  
24 prior to surgery and encouraging patients to eat a regular diet the night before surgery.  
25  
26 Minimizing *nil per os* duration is crucial to limit metabolic stress, minimize catabolic  
27 response from surgery, reduce risk of short term atrophy of the gastrointestinal villi, and  
28 protect patients against developing insulin resistance, which has been associated with  
29 postoperative complications.[5] Specifically, the study group sought to avoid situations  
30 where patients drink only clear liquids for several days prior to the operation, nullifying  
31 the intentions of ERAS precepts. Bowel preparation remains an open debate.[3] Given  
32 the lack of supporting data for this specific patient population, the study group chose to  
33 omit formal bowel preparation in the ERAS protocol but aims to study this question  
34  
35 secondarily.  
36  
37  
38  
39  
40  
41  
42  
43  
44  
45  
46  
47  
48  
49  
50

51 Venous thromboembolism (VTE) prophylaxis was added with the caveat that it should  
52 apply only to those patients with certain risk factors (age  $\geq$  14 years, BMI  $\geq$  30 kg/m<sup>2</sup>,  
53 history of VTE, history of malignancy, history of coagulation disorder). The primary  
54  
55  
56  
57

1  
2  
3 recommendation was for sequential compression devices to be placed on the patient  
4 prior to induction. No recommendation was made for pharmacologic prophylaxis on the  
5 basis that the risk/benefit profile may not make sense in children.[15,16] Since creating  
6 this clinical pathway, there have been new reports regarding clarification of pediatric risk  
7 factors for VTE.[16,17] Future revisions of the protocol will require adjustment to match  
8 newer evidence. Normothermia was also added and defined as a core body temperature  
9 between 36–38°C from incision to close time. Any value outside this range nullifies the  
10 measure. Maintaining normal temperatures may minimize risk of wound infection in  
11 adults.[18,19] Notably, normothermia promotes normal metabolic demands on the body  
12 (including pharmacokinetics of anesthetics) and minimizes stress from hypo- or  
13 hyperthermic conditions.[20] This was a Surgical Care Improvement Project core  
14 measure (SCIP-INF-10).[21] The evidence underlying this measure is not level I, but the  
15 study group included it for its importance from a physiologic perspective and to match  
16 existing published ERAS principles.

17  
18  
19  
20  
21  
22  
23  
24  
25  
26  
27  
28  
29  
30  
31  
32  
33  
34  
35  
36 Minimizing surgical drains is another ERAS goal. To adapt this to lower urinary tract  
37 reconstruction, it was defined as avoiding placement of intraperitoneal or subcutaneous  
38 drains. This measure does not include urinary drains, as the group felt these to be  
39 important to protect and maximize drainage of the urinary tract postoperatively as a  
40 matter of urologic principle. To account for those patients in whom a clinical decision  
41 has been made to leave an intraperitoneal or subcutaneous drain, a postoperative  
42 measure was added that any such drains should be removed on or by postoperative  
43 day four. This day was proposed on the basis of pilot data showing that many patients  
44 are ready to go home and that these drains are rarely helpful.

1  
2  
3 The remainder of the measures from the pilot study were adopted and definitions  
4 updated to be internally consistent and account for most foreseeable scenarios. Refer to  
5  
6  
7  
8 **Supplementary Table 1** for complete definitions of all 20 ERAS protocol measures.  
9  
10 Importantly, the ERAS protocol as defined was to be adopted by all participating centers  
11 as standard of care for treatment of patients undergoing urologic reconstructive surgery.  
12  
13  
14

### 15 **Study Design**

16 Several study designs were debated and discussed, including randomized controlled  
17 trials (RCT) of various permutations as well as prospective observational studies.  
18  
19

20 Important characteristics discussed included ensuring both implementation and study  
21 design were feasible with minimal overhead, robust data collection through the use of a  
22 shared REDCap database, *a priori* defined ERAS protocol definitions and outcomes,  
23 inclusion of both pediatric (ages 4–17 years) and emerging young adult (18–25) patients  
24 undergoing lower urinary tract reconstruction, and identification of an adequate control  
25 group to demonstrate clinically meaningful differences.  
26  
27  
28  
29  
30  
31  
32  
33  
34  
35

36 Several centers (Children’s Hospital Colorado, St. Louis Children’s Hospital, and  
37 Cincinnati Children’s Hospital Medical Center) already had ERAS protocols in place (or  
38 started them concurrently during study startup) and randomization by patient was felt to  
39 lack equipoise on the basis of pilot data showing substantial patient benefit.  
40  
41  
42  
43  
44

45 Randomization by protocol item was deemed too complex and not feasible.  
46  
47

48 Randomization by surgeon was also felt to lack equipoise, although this is debatable  
49 from the standpoint that opposing views on ERAS implementation details may represent  
50 unknowable qualities of the intervention. Randomization by center would suffer similar  
51 pitfalls identified above. Blinding and allocation concealment are staples of RCTs, but  
52  
53  
54  
55  
56  
57  
58



1  
2  
3 are not possible in the setting of implementation of a complex protocol involving tens of  
4 interventions that touch nearly every aspect of the diffuse perioperative space.  
5  
6

7 Furthermore, ERAS relies on standardization of perioperative care, and having patients  
8 on either an ERAS protocol or ad hoc care would necessarily create an unwelcome  
9 opportunity for cross contamination issues. A stepped wedge cluster randomized trial  
10 design was also considered and is being planned for a separate large multicenter effort  
11 in pediatric bowel resection for inflammatory bowel disease.[22] Because two centers in  
12 this study group already had existing ERAS protocols, this was not compatible with this  
13 option.  
14  
15  
16  
17  
18  
19  
20  
21  
22

23  
24 The notion that RCT may not be appropriate in all circumstances, particularly within the  
25 realm of surgical procedures, is not new and has been discussed previously.[23] There  
26 is an applicable framework for advancing surgical care through research and creation of  
27 evidence-based practices called the Idea, Development, Exploration, Assessment, and  
28 Long-term study (IDEAL) framework.[24] In this classification, surgical innovation  
29 passes through several different stages. ERAS in pediatric urology is in the beginning  
30 stages and falls under stages 2 (Development) or stage 3 (Exploration), given the  
31 ground work shown in two small early studies.[12,13] The IDEAL framework defines  
32 goals and methods that are best suited to each stage. At stage 3, prospective study is  
33 carried out in either an uncontrolled manner or in smaller size than a full-blown  
34 controlled trial. Because of the limitations posed by ERAS, equipoise, and surgeon  
35 experience, the study group determined the best study would be a case-control study,  
36 with ERAS patients making up a prospective observational arm and propensity-matched  
37 controls coming from recent patients not exposed to the ERAS protocol.  
38  
39  
40  
41  
42  
43  
44  
45  
46  
47  
48  
49  
50  
51  
52  
53  
54  
55  
56  
57  
58  
59  
60

1  
2  
3 After discussion, the study group defined two study phases. First, a pilot phase will  
4 assess study recruitment across sites, ERAS implementation, protocol adherence, and  
5 study procedures. Second, an exploration phase will prospectively compare all patients  
6 on the ERAS protocol to recent historical controls matched on propensity to undergo  
7 surgery with utilization of an ERAS protocol, should they have been treated presently,  
8 using clinically-important covariates deemed most likely to affect recovery. Data from  
9 the pilot study will be fed forward into the exploratory study. The decision for a built-in  
10 pilot study allows each center to build comfort level with study procedures along with  
11 maturation of the ERAS protocol. From a methodological standpoint, a pilot study is  
12 setup like a smaller version of the larger study without the need to define sample size or  
13 demonstrate clinically important outcomes but rather examine outcomes related to the  
14 setup of the study itself.[25] A built-in pilot component at each center (first five patients)  
15 will allow ascertainment of treatment team perceptions of ERAS and barriers to protocol  
16 implementation. While five is a small number, high-volume centers only perform 10–15  
17 of these cases per year.[26]

### 38 **Center Eligibility and Patient Selection**

39 Centers will be allowed to enroll patients in the study if the center performed a minimum  
40 of five lower urinary tract reconstructive operations in the year prior to center enrollment.  
41 This constitutes a baseline measure of quality and familiarity with the care of these  
42 complex patients perioperatively.

43 Surgeons and research assistants at each respective center will be responsible for  
44 subject identification and recruitment through existing clinical relationships. Patients  
45 aged of 4–25 years old undergoing the following lower urinary tract reconstructive

1  
2  
3 operations may be enrolled after providing informed consent (and assent, when  
4 applicable, see **Supplementary Files – Consent and Assent** for examples):  
5  
6 augmentation enterocystoplasty, creation of continent urinary channel  
7  
8 (appendicovesicostomy, ileovesicostomy, or colovesicostomy), creation of an antegrade  
9  
10 continence enema channel, and incontinent urinary diversions (ileal conduit with or  
11  
12 without cystectomy or ileovesicostomy). Because some of these operations may be  
13  
14 done with or without a bowel anastomosis—which is a major risk factor for surgical  
15  
16 stress, increased operative time, and risk of ileus—bowel anastomosis will be tracked  
17  
18 and used for matching cases to controls as it is a strong effect modifier. Some providers  
19  
20 noted patients with neurogenic bowel not on a bowel management program (retrograde  
21  
22 enemas, oral stool softeners, or rectal suppositories) may be at increased risk  
23  
24 prolonged return of bowel function, ileus, bowel obstruction, or anastomotic bowel leak.  
25  
26 For this reason, clinically constipated patients defined as Bristol 1 or 2 stools more than  
27  
28 once per week, bowel movement interval greater than every other day, or palpable stool  
29  
30 in > 50% of colon on physical preoperative exam will be excluded from the study.  
31  
32 Patients with these findings become eligible if their stooling pattern is addressed at least  
33  
34 4 weeks in advance of surgery with implementation of a bowel management program  
35  
36 continued up to the night before surgery.  
37  
38  
39  
40  
41  
42  
43  
44

45 The use of historical controls has long been felt to be controversial, secondary to the  
46  
47 retrospective nature of their identification and data collection and potential biases. Using  
48  
49 quality improvement methodology, in which historical controls are often used to  
50  
51 compare outcomes to an intervention cohort, run diagrams and interrupted time-series  
52  
53 analysis can provide insight into changes occurring over time with regards to either  
54  
55  
56  
57

1  
2  
3 process, clinical outcome, or balancing measures.[27] This has the benefit of ensuring  
4 that the prospectively enrolled patient outcomes are attributed to the intervention  
5 (ERAS) and not to changes in patient care that were already underway prior to  
6 implementation. While use of prospective controls from non-ERAS institutions might  
7 serve as a better comparison (reduced bias, prospective data collection, parallel  
8 comparison of modern surgical patients undergoing similar operations), the study group  
9 felt that observational bias (Hawthorne effect) might influence malleable outcomes such  
10 as length of stay.  
11  
12  
13  
14  
15  
16  
17  
18  
19  
20  
21

## 22 **Outcome Measures**

23 The pilot phase outcomes of interest include enrolling a minimum of two patients per  
24 center in first six months, and completing at least 90 days follow up on the first five  
25 enrolled patients (**Figure 1**). A goal of  $\geq 70\%$  protocol item adherence (out of 20) at  $\geq$   
26 75% of study centers was set. Finally, barriers to implementation will be identified and  
27 may determine if there is a need to optimize the protocol for wider application.  
28  
29  
30  
31  
32  
33  
34  
35  
36  
37

38 The primary outcome of the exploratory phase is adherence to the ERAS protocol with  
39 number of items achieved (out of 20). Secondary outcomes include length of stay, 30-  
40 day readmissions, 90-day reoperations, 90-day returns to the emergency room, 90-day  
41 complications by Clavien-Dindo classification (see **Table 2** for full list of defined  
42 complications), number of long-term complications within 1 year (**Table 3**), minimum,  
43 median, maximum daily pain score during first 7 days after surgery, and mean daily IV  
44 morphine equivalents (mg/kg) usage during first 3 days after surgery.[28] It is important  
45 to clarify that because this is an observational trial and the ERAS protocol is  
46  
47  
48  
49  
50  
51  
52  
53  
54  
55  
56  
57  
58  
59  
60

1  
2  
3 implemented as standard of care at each center, the collection of complications here is  
4  
5 a clinical outcome measure rather than one seen as a result of study intervention.  
6  
7

8  
9 In addition to the objective clinical outcomes listed, patient- and family-reported  
10  
11 outcome measures will be administered to assess the impact of surgery on work and  
12  
13 school (e.g., missed days of each) and adjustment time at home needed to return to  
14  
15 “normal” (i.e., daily routines not impacted heavily by having had surgery). These  
16  
17 instruments include open-ended, non-validated parent and child surveys to be given  
18  
19 pre- and postoperatively, and a Quality of Recovery 9 questionnaire to assess overall  
20  
21 return of function (given before and after surgery, and again at clinic follow up).[29]  
22  
23

24 **Figure 2** demonstrates which outcome measures will be tracked over time with respect  
25  
26 to the index surgery. Patients will be followed for one year, specifically to ensure that  
27  
28 patients with a ventriculoperitoneal (VP) shunt do not experience increased rates of  
29  
30 externalization, infection, or revision which has long been a concern of the  
31  
32 community.[30]  
33  
34  
35  
36

### 37 **Data Collection**

38  
39 A shared REDCap database has been designed, tested, and implemented for use for  
40  
41 this study. Data use agreements have been executed between centers and data sharing  
42  
43 language was incorporated into patient consent to allow sharing of de-identified data  
44  
45 sets maintaining patient confidentiality. The majority of perioperative process, outcome,  
46  
47 and balancing measures are charted within the medical record as part of standard of  
48  
49 care. Where possible, these will be automatically abstracted electronically as five out of  
50  
51 the six study centers use the Epic electronic health record system. In cases where data  
52  
53 is not normative or where it requires clinical interpretation or cannot be abstracted  
54  
55  
56  
57  
58

1  
2  
3 electronically, manual chart review by research assistants trained by the study team will  
4  
5 be done. Continuous data quality checks will be completed quarterly, including analysis  
6  
7 of missing required data and any discrepancies. The study commenced enrollment in  
8  
9 2017 and aims to conclude in 2021.  
10  
11

12  
13 After primary accrual is completed, the study committee plans to transition the shared  
14  
15 database into a shared clinical registry for ongoing data collection to continue to study  
16  
17 ERAS and further refinements to the care pathway.  
18  
19  
20

### 21 **Statistical Analysis**

22  
23 A total of 64 ERAS patients will be needed to detect a decrease in mean overall LOS by  
24  
25 2 days, with type I error of 5% (false positive) and type II error of 20% (false negative)  
26  
27 based on data from the pilot study showing mean LOS of 8.0 days (SD 7.3) for historical  
28  
29 patients versus 5.7 days (SD 5.1) for patients who were treated under the ERAS  
30  
31 protocol. Patients will be propensity score-matched on likelihood to have been treated  
32  
33 under an ERAS protocol 1:2 to recent historical controls from 5 years prior to the  
34  
35 initiation of the ERAS protocol. Propensity matching controls for measured baseline  
36  
37 covariates before analysis of the outcomes to reduce confounding. Based on pilot data  
38  
39 (mean 2.1 complications/patient [SD 1.9] historically and versus 1.3  
40  
41 complications/patient [SD 1.2] under ERAS), this study will also be powered to detect a  
42  
43 decrease in any grade complications per patient by 50%. Patients will be divided into  
44  
45 two strata: those who underwent and did not undergo a bowel anastomosis as part of  
46  
47 the index operation. Propensity score-matching within the two strata using nearest-  
48  
49 neighbor algorithm (also referred to as greedy matching) will occur on the following  
50  
51 variables: age, sex, chronic kidney disease, presence of VP shunt, planned bladder  
52  
53  
54  
55  
56  
57  
58

1  
2  
3 augmentation, history of prior abdominal surgery (other than VP shunt), diagnosis of  
4 myelomeningocele, ambulatory status, and center. Bowel anastomosis was determined  
5 by the study group to be a strong effect modifier and thus patients will be exactly  
6 matched on that variable (creating two strata) and propensity matched on remaining  
7 covariates to avoid overfitting.  
8  
9

10 Because of the nature of propensity-matched data, care must be taken for comparison  
11 of historical controls and ERAS cases. Differences in baseline characteristics between  
12 matched groups will be assessed using methods that are not influenced by sample size  
13 and that do not refer to a hypothetical population (i.e., standardized differences).[31]

14 The Mantel-Haenszel test will be used to compare proportions, and generalized linear  
15 modelling with generalized estimating equations to adjust for the matching design will  
16 be used to assess association of outcomes and predictors.[32] Two-tailed p-values <  
17 0.05 will be considered significant. No interim analyses are planned.  
18  
19  
20  
21  
22  
23  
24

### 25 **Study Committee**

26 Given the importance of a strong implementation serving as a foundation for  
27 success, the study group has created several committees, including an organizing  
28 committee and audit committee. The organizing committee is charged with overseeing  
29 data collection, arranging study conference calls and meetings and adjudicating  
30 authorship for subsequent papers laid out through a set of bylaws. The organizing  
31 committee serves as a backstop to proper trial conduct under the purview of study  
32 (KOR) and site primary investigators (ACS, GJV, RC, DIC, RSZ). The audit committee  
33 arguably serves a more important role, overseeing regular clinical audits of ERAS  
34 protocol compliance. The committee is charged with meeting after each center's pilot  
35  
36  
37  
38  
39  
40  
41  
42  
43  
44  
45  
46  
47  
48  
49  
50  
51  
52  
53  
54  
55  
56  
57  
58  
59  
60

1  
2  
3 phase (5 patients) and ad hoc thereafter, and they will review overall compliance and  
4  
5 serve as an external study group as part of plan/do/study/act (PDSA) quality  
6  
7 improvement methodology to identify challenging areas and suggest solutions that may  
8  
9 be novel for that center. This highlights the point that the ERAS clinical pathway sets  
10  
11 high-level goals, but leaves implementation details and specifics to each center. This  
12  
13 creates heterogeneity that mirrors real-world quality improvement projects, improving  
14  
15 the generalizability of the project, but can lead to maladaptive internal center processes.  
16  
17 The audit committee's goal is to help each center identify issues early in the  
18  
19 implementation and find creative solutions.  
20  
21  
22  
23  
24

### 25 **Strengths and Limitations of the Study Design**

26 Strengths of this study design include its multicenter nature, which the authors aim to  
27  
28 use to demonstrate feasibility of ERAS implementation in a variety of geographically-  
29  
30 diverse pediatric-focused settings. Prospective data collection, *a priori* definitions of  
31  
32 protocol elements, and an exhaustive list of potential short and long-term complications  
33  
34 also lend strengths to its design. The SPIRIT checklist was used when preparing this  
35  
36 report.[33] Potential limitations of this study include variation in protocol implementation,  
37  
38 unsuccessful attempts at protocol implementation, unobserved patient characteristics or  
39  
40 other biases affecting outcome measures, and use of historical, retrospective controls.  
41  
42 The study group notes that there is very little level I evidence for protocol items in  
43  
44 pediatric patients. Some are extrapolated from adult evidence and may not hold true.  
45  
46 Additionally, patient-reported outcomes in this population are lacking. Pain interference  
47  
48 and validated general function measures are available but were not designed nor tested  
49  
50 expressly to measure recovery after surgery. When examining clinical outcomes,  
51  
52  
53  
54  
55  
56  
57  
58  
59  
60



1  
2  
3 propensity matching on clinically-relevant patient characteristics will allow meaningful  
4 comparison, and run charts of patient care variables over time will shed light on any  
5 changes in care patterns or outcomes that may have already been underway.  
6  
7  
8  
9

## 10 **Ethics and Dissemination**

11 This study was approved by each free-standing tertiary care children's hospital  
12  
13 respective institutional review board (St. Louis Children's Hospital 201703081,  
14  
15 Children's Hospital of Pittsburgh 17070089, Children's Hospital Colorado 17-0746,  
16  
17 Cincinnati Children's Hospital Medical Center 2017-3322, Ann & Robert H. Lurie  
18  
19 Children's Hospital 2019-2566, and Children's Hospital of Richmond at VCU  
20  
21 HM20015891). Prospectively enrolled patients who meet inclusion criteria will be  
22  
23 approached for inclusion by either a urologist or research assistant prior to the day of  
24  
25 surgery. Study protocol does not allow for patients to be approached in the preoperative  
26  
27 area to avoid patient or family coercion. No study activities will occur prior to obtaining  
28  
29 consent. Patients under 18 years age (and over specific ages that vary by center) will  
30  
31 assent to enrollment. Participants retain the right to withdraw at any point for any  
32  
33 reason. Importantly, non-adherence to the ERAS protocol or ERAS protocol deviation is  
34  
35 not grounds for removal from the study. Not every patient will meet clinical standards for  
36  
37 every protocol item. Rather, the goal of the ERAS protocol is to maximize evidence-  
38  
39 based strategies to return the patient to normal function. ERAS protocol changes will  
40  
41 only be made after completing primary accrual and analysis of results in conjunction with  
42  
43 a thorough literature review by the study committee.  
44  
45  
46  
47  
48  
49  
50  
51  
52

## 53 **Patient and Public Involvement**

1  
2  
3 ERAS, in many respects, is a patient-focused quality improvement project. While no  
4 patients or families were directly involved in the design of this study or recruitment of  
5 potential subjects, families expressed interest in being notified of the study results and  
6 this will occur. Patient and families will be engaged in future revisions of the underlying  
7 ERAS clinical pathway that result from evidence gathered through this study.  
8  
9  
10  
11  
12  
13

14  
15 In conclusion, Pediatric Urology Recovery After Surgery Endeavor (PURSUE,  
16 ClinicalTrials.gov NCT03245242) is a multicenter, prospective propensity-matched  
17 case-control cohort study that will examine outcomes in pediatric and emerging young  
18 adult patients undergoing lower urinary tract reconstruction who receive care under an  
19 ERAS pathway.[34] Results will be published in peer-reviewed journals by study group  
20 members. This protocol marks the first phase of a collaborative quality improvement  
21 effort within the pediatric urology community to improve and standardize care of patients  
22 undergoing urologic reconstructive surgery.  
23  
24  
25  
26  
27  
28  
29  
30  
31  
32  
33

### 34 **Acknowledgements**

35 PURSUE study group members: Douglas E. Coplen (St. Louis Children's Hospital, St.  
36 Louis, MO, USA), Paul F. Austin (Texas Children's Hospital, Houston, TX, USA), Erica  
37 J. Traxel (St. Louis Children's Hospital, St. Louis, MO, USA), Jacob AuBuchon (St.  
38 Louis Children's Hospital, St. Louis, MO, USA), Robert P. Moore (St. Louis Children's  
39 Hospital, St. Louis, MO, USA), Vijaya M. Vemulakonda (Children's Hospital Colorado,  
40 Aurora, CO, USA), Brian T. Caldwell (Children's Hospital Colorado, Aurora, CO, USA),  
41 Carter J. Sevick (Children's Hospital Colorado, Aurora, CO, USA), Nicholas Burjek (Ann  
42 & Robert H. Lurie Children's Hospital of Chicago, Chicago, IL, USA), Elizabeth B. Yerkes  
43 (Ann & Robert H. Lurie Children's Hospital of Chicago, Chicago, IL, USA), Yvonne Y. Chan  
44 (Ann & Robert H. Lurie Children's Hospital of Chicago, Chicago, IL, USA), C.D. Anthony  
45 Herndon (Children's Hospital of Richmond at VCU, Richmond, VA, USA)  
46  
47  
48  
49

### 50 **Funding**

51 A Children's Hospital Colorado Clinical and Operational Effectiveness and Patient  
52 Safety grant supports the implementation and study of an ERAS pathway. A Midwest  
53 Stone Institute grant supports PURSUE implementation at St. Louis Children's Hospital  
54 (grant numbers, N/A). Neither source of funding participated in the study design,  
55  
56  
57

1  
2  
3 collection, analysis or interpretation of data, in the writing of the manuscript, or in the  
4 decision to submit this manuscript for publication.  
5

### 6 **Conflict of Interest**

7  
8 None  
9

### 10 **Author Statement**

11  
12 KOR, BTC, and DTW organized the initial meeting to discuss study protocol concepts in Dallas,  
13 TX, USA in 2016. KOR, MAB, TPW, DIC, DTW, and GJV developed and refined the 20-  
14 protocol ERAS pathway used in the study based on literature searches, screening and review.  
15 KOR led protocol development and created patient recruitment tools. KOR, MAB and ACS chair  
16 the PURSUE organizing committee that oversees study activities. KOR is the study primary  
17 investigator. KOR, ACS, RSZ, RC, DIC, GJV serve as site primary investigators. KOR  
18 performed the power analysis and statistical analysis plans with additional input, oversight and  
19 revision by DIC. KOR, ACS, DTW, GJV, TPW, BV, DIC, RC, RSZ, PURSUE Study Group and  
20 MAB were involved in the study conception, design, protocol manuscript drafting and critical  
21 revision. All authors approve the final version.  
22  
23

### 24 **References**

- 25  
26  
27 1 Schlomer BJ, Saperston K, Baskin L. National Trends in Augmentation Cystoplasty  
28 in the 2000s and Factors Associated with Patient Outcomes. *J Urol*  
29 2013;**190**:1352–8. doi:10.1016/j.juro.2013.04.075  
30  
31 2 Wang H-HS, Lloyd JC, Wiener JS, *et al*. Nationwide Trends and Variations in  
32 Urological Surgical Interventions and Renal Outcome in Patients with Spina Bifida.  
33 *J Urol* 2016;**195**:1189–94. doi:10.1016/j.juro.2015.11.033  
34  
35 3 Weatherly DL, Szymanski KM, Whittam BM, *et al*. Comparing inpatient versus  
36 outpatient bowel preparation in children and adolescents undergoing  
37 appendicovesicostomy. *J Pediatr Urol* 2018;**14**:50.e1–50.e6.  
38 doi:10.1016/j.jpuro.2017.07.013  
39  
40  
41 4 Ljungqvist O, Scott M, Fearon KC. Enhanced Recovery After Surgery: A Review.  
42 *JAMA Surg* 2017;**152**:292–8. doi:10.1001/jamasurg.2016.4952  
43  
44 5 Fearon KCH, Ljungqvist O, Meyenfeldt Von M, *et al*. Enhanced recovery after  
45 surgery: A consensus review of clinical care for patients undergoing colonic  
46 resection. *Clin Nutr* 2005;**24**:466–77. doi:10.1016/j.clnu.2005.02.002  
47  
48  
49 6 Thiele RH, Rea KM, Turrentine FE, *et al*. Standardization of care: impact of an  
50 enhanced recovery protocol on length of stay, complications, and direct costs after  
51 colorectal surgery. *J Am Coll Surg* 2015;**220**:430–43.  
52 doi:10.1016/j.jamcollsurg.2014.12.042  
53  
54  
55  
56  
57  
58

- 1  
2  
3 7 Liu VX, Rosas E, Hwang J, *et al.* Enhanced Recovery After Surgery Program  
4 Implementation in 2 Surgical Populations in an Integrated Health Care Delivery  
5 System. *JAMA Surg* 2017;**152**:e171032. doi:10.1001/jamasurg.2017.1032  
6
- 7 8 ERAS Compliance Group. The Impact of Enhanced Recovery Protocol Compliance  
8 on Elective Colorectal Cancer Resection: Results From an International Registry.  
9 *Ann Surg* 2015;**261**:1153–9. doi:10.1097/SLA.0000000000001029  
10
- 11 9 Short HL, Heiss KF, Burch K, *et al.* Implementation of an enhanced recovery  
12 protocol in pediatric colorectal surgery. *J Ped Surg* 2017;**118**:1131–6.  
13 doi:10.1213/ANE.0000000000000228  
14
- 15 10 Reismann M, Kampen von M, Laupichler B, *et al.* Fast-track surgery in infants and  
16 children. *J Ped Surg* 2007;**42**:234–8. doi:10.1016/j.jpedsurg.2006.09.022  
17
- 18 11 Shinnick JK, Short HL, Heiss KF, *et al.* Enhancing recovery in pediatric surgery: a  
19 review of the literature. *J Surg Res* 2016;**202**:165–76.  
20 doi:10.1016/j.jss.2015.12.051  
21
- 22 12 Rove KO, Brockel MA, Saltzman AF, *et al.* Prospective study of enhanced recovery  
23 after surgery protocol in children undergoing reconstructive operations. *J Pediatr*  
24 *Urol* 2018;**14**:252.e1–252.e9. doi:10.1016/j.jpuro.2018.01.001  
25
- 26 13 Haid B, Karl A, Koen M, *et al.* Enhanced Recovery after Surgery Protocol for  
27 Pediatric Urological Augmentation and Diversion Surgery Using Small Bowel. *J*  
28 *Urol* 2018;**200**:1100–6. doi:10.1016/j.juro.2018.06.011  
29
- 30 14 Daneshmand S, Ahmadi H, Schuckman AK, *et al.* Enhanced recovery protocol after  
31 radical cystectomy for bladder cancer. *J Urol* 2014;**192**:50–5.  
32 doi:10.1016/j.juro.2014.01.097  
33
- 34 15 Ahn JJ, Merguerian PA, Shnorhavorian M. Incidence and risk factors associated  
35 with 30-day post-operative venous thromboembolism: A NSQIP-pediatric analysis.  
36 *J Pediatr Urol* 2018;**14**:335.e1–335.e6. doi:10.1016/j.jpuro.2018.04.009  
37
- 38 16 Cairo SB, Lautz TB, Schaefer BA, *et al.* Risk factors for venous thromboembolic  
39 events in pediatric surgical patients: Defining indications for prophylaxis. *J Ped*  
40 *Surg* 2018;**53**:1996–2002. doi:10.1016/j.jpedsurg.2017.12.016  
41
- 42 17 Sherrod BA, McClugage SG III, Mortellaro VE, *et al.* Venous thromboembolism  
43 following inpatient pediatric surgery: Analysis of 153,220 patients. *J Ped Surg*  
44 2019;**54**:631–9.  
45
- 46 18 Kurz A, Sessler DI, Lenhardt R. Perioperative normothermia to reduce the  
47 incidence of surgical-wound infection and shorten hospitalization. Study of Wound  
48 Infection and Temperature Group. *N Engl J Med* 1996;**334**:1209–15.  
49 doi:10.1056/NEJM199605093341901  
50

- 19 Wong PF, KUMAR S, Bohra A, *et al*. Randomized clinical trial of perioperative systemic warming in major elective abdominal surgery. *Br J Surg* 2007;**94**:421–6. doi:10.1002/bjs.5631
- 20 Lenhardt R, Marker E, Goll V, *et al*. Mild Intraoperative Hypothermia Prolongs Postanesthetic Recovery. *Anesthes* 1997;**87**:1318–23.
- 21 Rosenberger LH, Politano AD, Sawyer RG. The Surgical Care Improvement Project and Prevention of Post-Operative Infection, Including Surgical Site Infection. *Surg Infect (Larchmt)* 2011;**12**:163–8. doi:10.1089/sur.2010.083
- 22 Clinical Trial NCT04060303: ENhancing Recovery in CHildren Undergoing Surgery for IBD (ENRICH-US). U.S. National Institutes of Health. 2019. <https://clinicaltrials.gov/ct2/show/NCT04060303> (accessed 25 Mar 2020).
- 23 Wallis CJD, Detsky AS, Fan E. Establishing the Effectiveness of Procedural Interventions: The Limited Role of Randomized Trials. *JAMA* 2018;**320**:2421–2. doi:10.1001/jama.2018.16329
- 24 McCulloch P, Altman DG, Campbell WB, *et al*. No surgical innovation without evaluation: the IDEAL recommendations. *Lancet* 2009;**374**:1105–12. doi:10.1016/S0140-6736(09)61116-8
- 25 Thabane L, Ma J, Chu R, *et al*. A tutorial on pilot studies: the what, why and how. *BMC Med Res Methodol* 2010;**10**:42. doi:10.1186/1471-2288-10-1
- 26 Bowlin P, Siparsky G, Wilcox D. Nationwide Review of Bladder Augmentation in Pediatric Hospitals. *J Urol* 2011;**185**:e477. doi:10.1016/j.juro.2011.02.820
- 27 EPOC Resources for review authors. Cochrane Effective Practice and Organisation of Care (EPOC). 2017. <https://epoc.cochrane.org/resources/epoc-resources-review-authors> (accessed 27 Mar 2019).
- 28 Dindo D, Demartines N, Clavien P-A. Classification of Surgical Complications. *Ann Surg* 2004;**240**:205–13. doi:10.1097/01.sla.0000133083.54934.ae
- 29 Myles PS, Hunt JO, Nightingale CE, *et al*. Development and Psychometric Testing of a Quality of Recovery Score After General Anesthesia and Surgery in Adults. *Anesth Analg* 1999;**88**:83–90. doi:10.1213/00000539-199901000-00016
- 30 Gundeti MS, Godbole PP, Wilcox DT. Is bowel preparation required before cystoplasty in children? *J Urol* 2006;**176**:1574–6. doi:10.1016/j.juro.2006.06.034
- 31 Austin PC. Balance diagnostics for comparing the distribution of baseline covariates between treatment groups in propensity-score matched samples. *Statist Med* 2009;**28**:3083–107. doi:10.1002/sim.3697

- 1  
2  
3 32 Fleiss JL, Levin B, Paik MC. The Analysis of Data from Matched Samples. In:  
4 *Statistical Methods for Rates and Proportions*. Hoboken, NJ: Wiley 2004; 373–406.  
5  
6 33 Chan AW, Tetzlaff JM, Altman DG, *et al*. SPIRIT 2013 statement: defining standard  
7 protocol items for clinical trials. *Ann Intern Med* 2013;**158**:200–7.  
8  
9 34 Clinical Trial NCT03245242: Pediatric Urology Recovery After Surgery Endeavor  
10 (PURSUE). U.S. National Institutes of Health. 2017.  
11 <https://clinicaltrials.gov/ct2/show/NCT03245242> (accessed 31 Aug 2017).  
12  
13  
14  
15  
16  
17  
18  
19  
20  
21  
22  
23  
24  
25  
26  
27  
28  
29  
30  
31  
32  
33  
34  
35  
36  
37  
38  
39  
40  
41  
42  
43  
44  
45  
46  
47  
48  
49  
50  
51  
52  
53  
54  
55  
56  
57  
58  
59  
60

## Figure Legends

**Figure 1.** Overview of study conception, implementation, center eligibility, patient inclusion and exclusion criteria, and design methodology arrived at through group consensus.

**Figure 2.** Timeline of patient enrollment, data collection including process and balancing measures, clinical outcomes, and patient-reported outcome measures during the PURSUE study.

## Tables

**Table 1.** Comprehensive list of pre-, intra-, and post-operative ERAS protocol items targeted by the care pathway, customized for pediatric urology patients. The definitions for these items were arrived at through multidisciplinary consensus of the study group.

| Pre-operative                                                                                              | Intra-operative                                              | Post-operative                                                                                                 |
|------------------------------------------------------------------------------------------------------------|--------------------------------------------------------------|----------------------------------------------------------------------------------------------------------------|
| Counsel about ERAS                                                                                         | Regional anesthesia<br>(catheter-based block)                | Nausea/vomiting prevention                                                                                     |
| Clear-liquid carbohydrate load<br>(10 mL/kg up to 350 mL)                                                  | Avoiding excess drains<br>(intraperitoneal or subcutaneous)  | Early feeding<br>(clears POD 0, regular POD 1)                                                                 |
| Avoid prolonged fasting<br>(eat regular diet and avoid prolonged<br>clears-only diet day prior to surgery) | Euvolemia<br>(4–7 mL/kg/hr crystalloid)                      | Early mobilization<br>(out of bed POD 1)                                                                       |
| No bowel preparation<br>(continue bowel regimen if on one)                                                 | Normothermia<br>(36–38°C during skin-to-skin time)           | Adjunctive pain medication<br>(acetaminophen and NSAID)                                                        |
| Antibiotic prophylaxis per AUA<br>guidelines                                                               | Minimizing opioids<br>(< 0.15 mg/kg IV morphine equivalents) | Early stoppage of intravenous fluids<br>(either discontinue or lower rate to keep<br>vein open [TKO] by POD 2) |
| DVT prophylaxis<br>(≥ age 14 or risk factors)                                                              | Minimally-invasive assistance<br>(at surgeon discretion)     | Early removal of extra drains/catheters<br>(non-urinary drain removal by POD 4)                                |
|                                                                                                            | No nasogastric tube on leaving OR                            | Minimizing opioids<br>(< 0.30 mg/kg/day IV morphine<br>equivalents)                                            |



**Table 2.** List of pre-defined postoperative short-term complications.**90-Day Short-Term Complications****Clavien Grade I**

electrolyte disturbance  
 fever ( $\geq 38^{\circ}\text{C}$ )  
 IV complication (infiltration)  
 nausea / vomiting  
 neuropraxia (positioning complication)  
 transient elevation in Cr (acute kidney injury)  
 wound dehiscence  
 incisional seroma  
 other grade I

**Clavien Grade II**

blood transfusion  
 catheter manipulation, ACE  
 catheter manipulation, Mitrofanoff / Monti / urethral / SPT  $\pm$  urinary retention  
 ileus requiring NG tube  $\pm$  TPN + nausea / vomiting  
 infection / bacteremia treated with Abx  $\pm$  fever  
 infection / pyelonephritis treated with Abx  $\pm$  fever  
 infection / superficial wound treated with bedside drainage, Abx  $\pm$  fever  
 infection / UTI treated with Abx  $\pm$  fever  
 infection / GI infection with Abx  $\pm$  fever  $\pm$  diarrhea  
 venous thromboembolism  
 lymphocele or chylous ascites treated conservatively with diet changes  
 other grade II

**Clavien Grade III**

abdominal abscess requiring IR / OR drainage  
 catheter malfunction / loss requiring placement in OR  
 fascial dehiscence / evisceration treated in OR  
 hemorrhage requiring embolization or OR  
 small bowel obstruction treated surgically in OR  
 urinoma requiring IR / OR drainage  
 ureteral obstruction requiring PNT by IR / OR  
 lymphocele or chyle leak requiring IR / OR drainage or intervention  
 other grade III

**Clavien Grade IV**

respiratory failure requiring ventilation  
 renal failure  
 multiorgan failure  
 sepsis  
 other grade IV

**Clavien Grade V**

death

**Table 3.** List of pre-defined postoperative long-term complications.

---

**1-Year Long-Term Complications**

---

channel stenosis (any level) requiring revision

channel false passage

bowel obstruction

bladder stone formation

bladder perforation

incisional hernia

new onset metabolic acidosis

new onset chronic kidney disease

new onset renal scarring

VP shunt externalization

VP shunt infection (positive shunt tip and cerebral spinous fluid cultures)

---

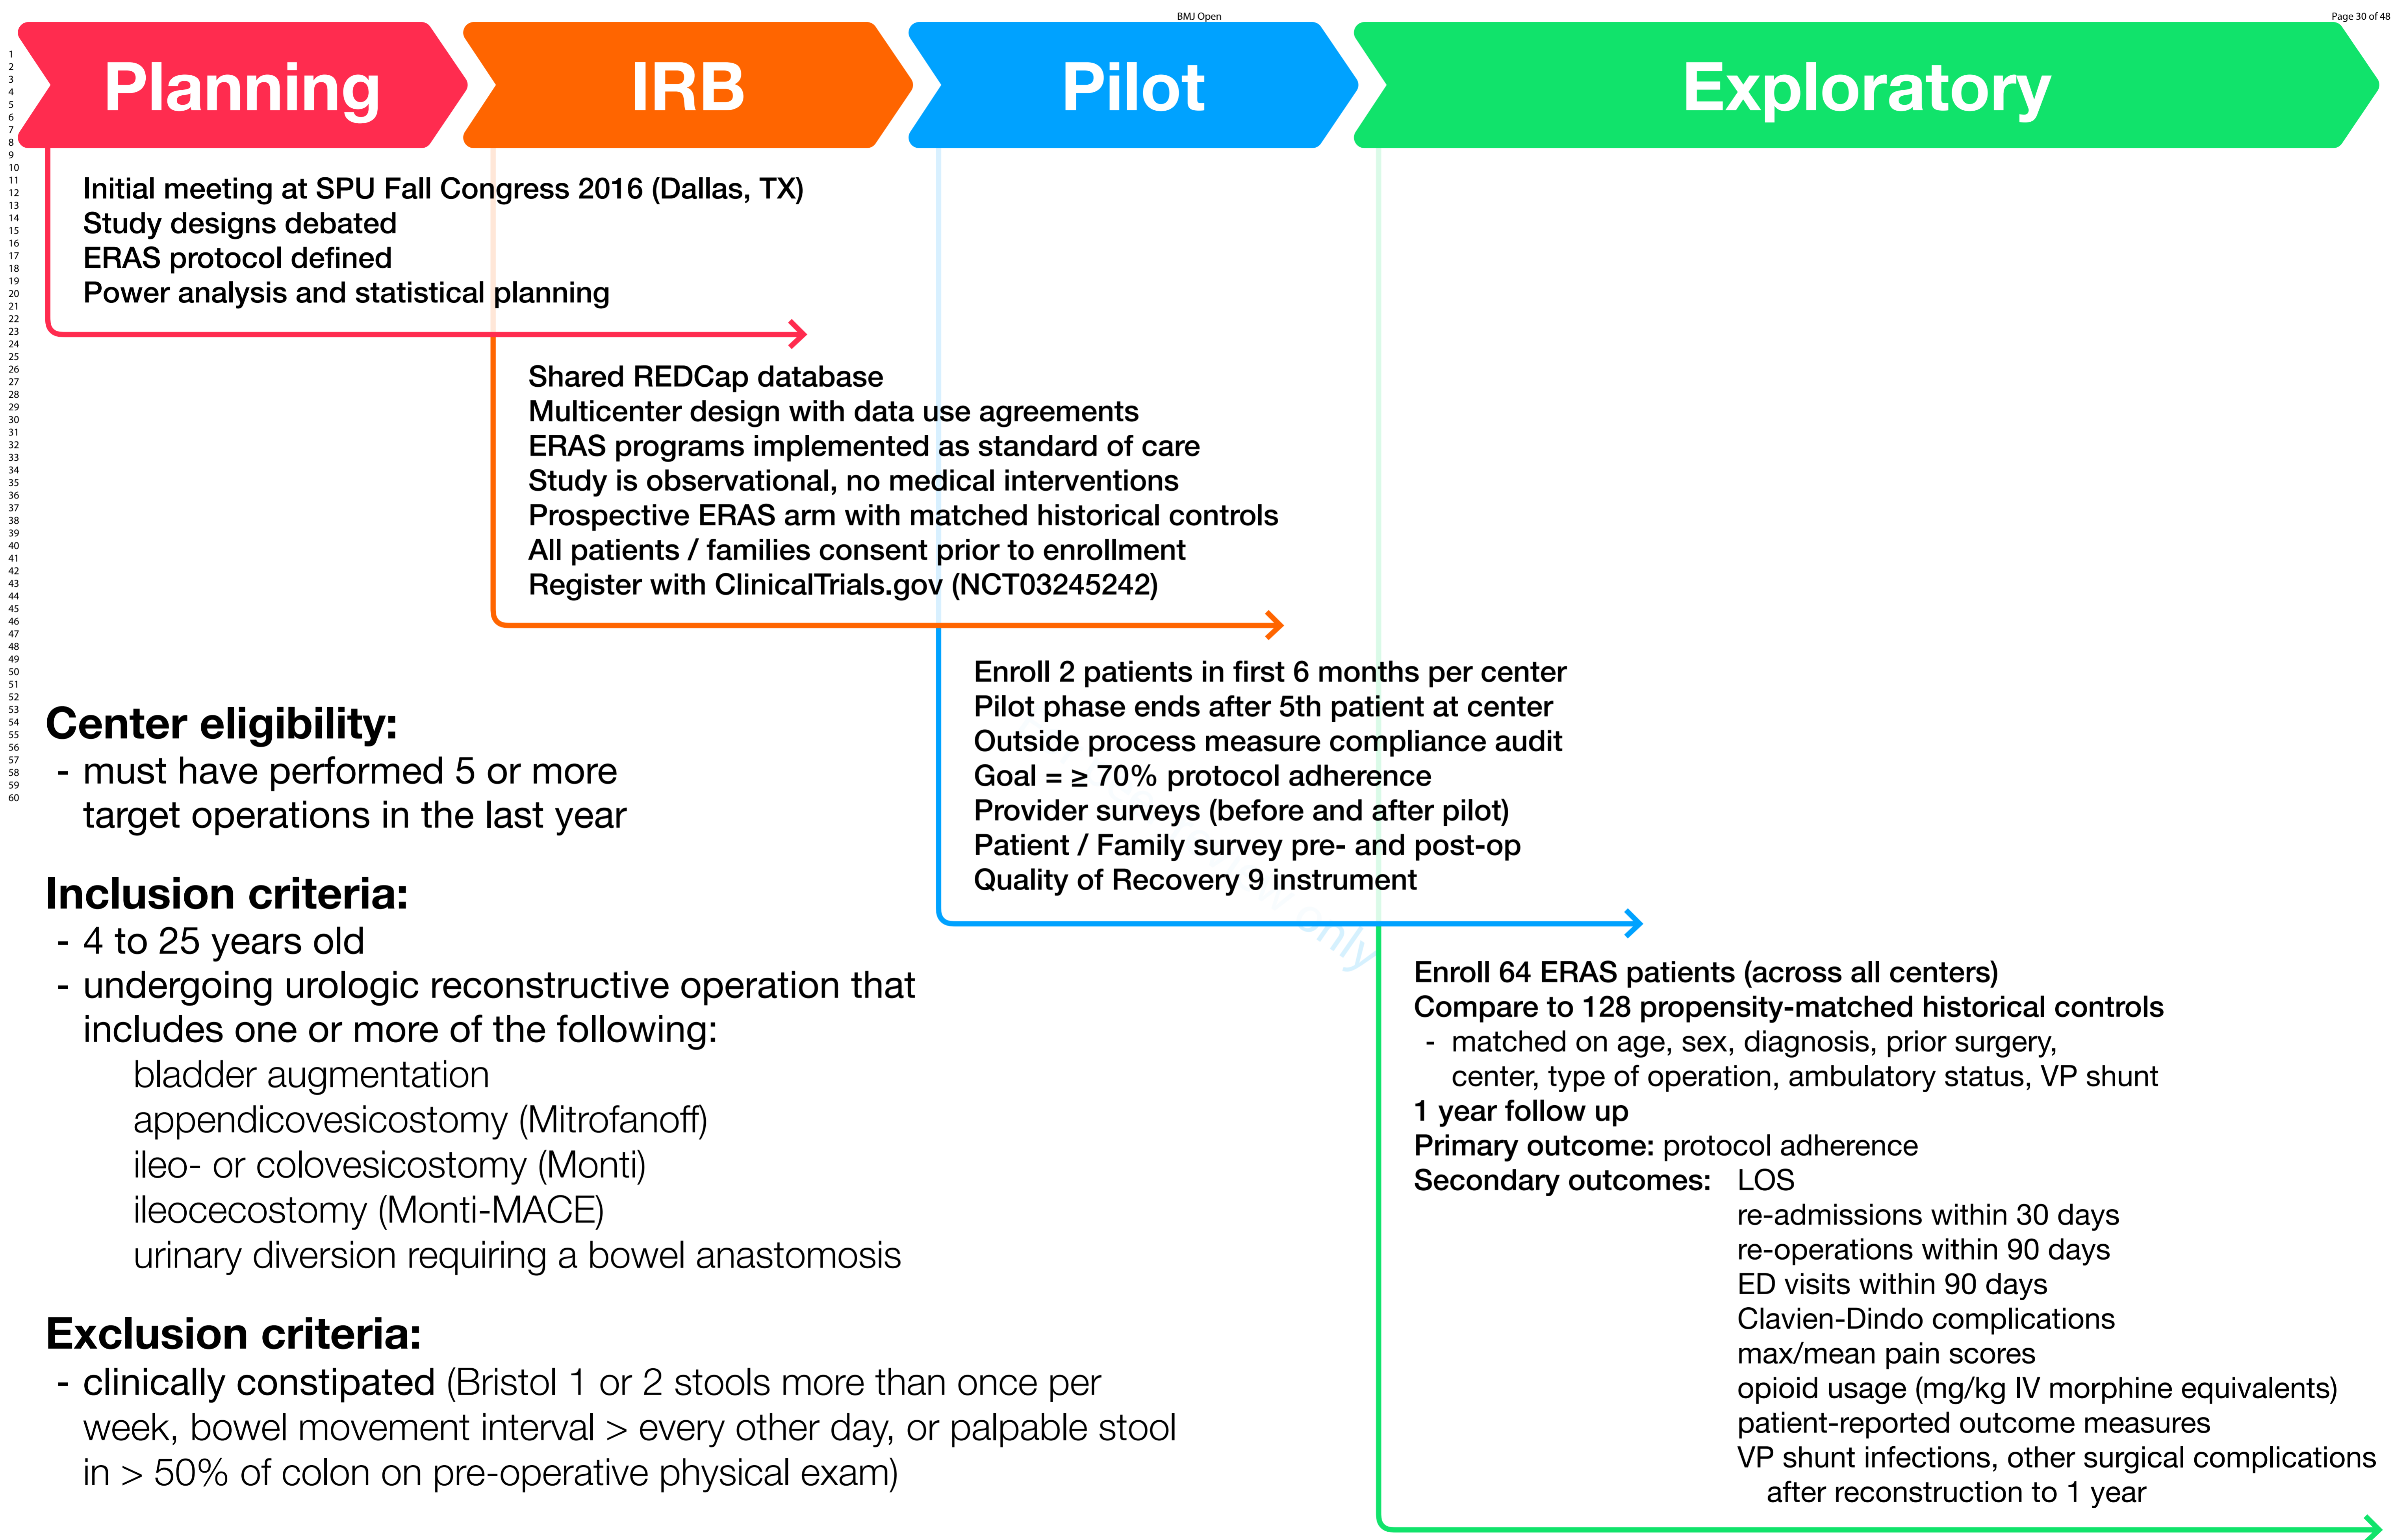

**Figure 1.** Overview of study conception, implementation, center eligibility, patient inclusion and exclusion criteria, and design methodology arrived at through group consensus.

Pre-surgery

Primary hospitalisation

After hospitalization

Patient data

-90 days to 0

Day #0

Day #1-7

Day #7-14

Discharge

30 days post-op

90 days post-op

1 year post-op

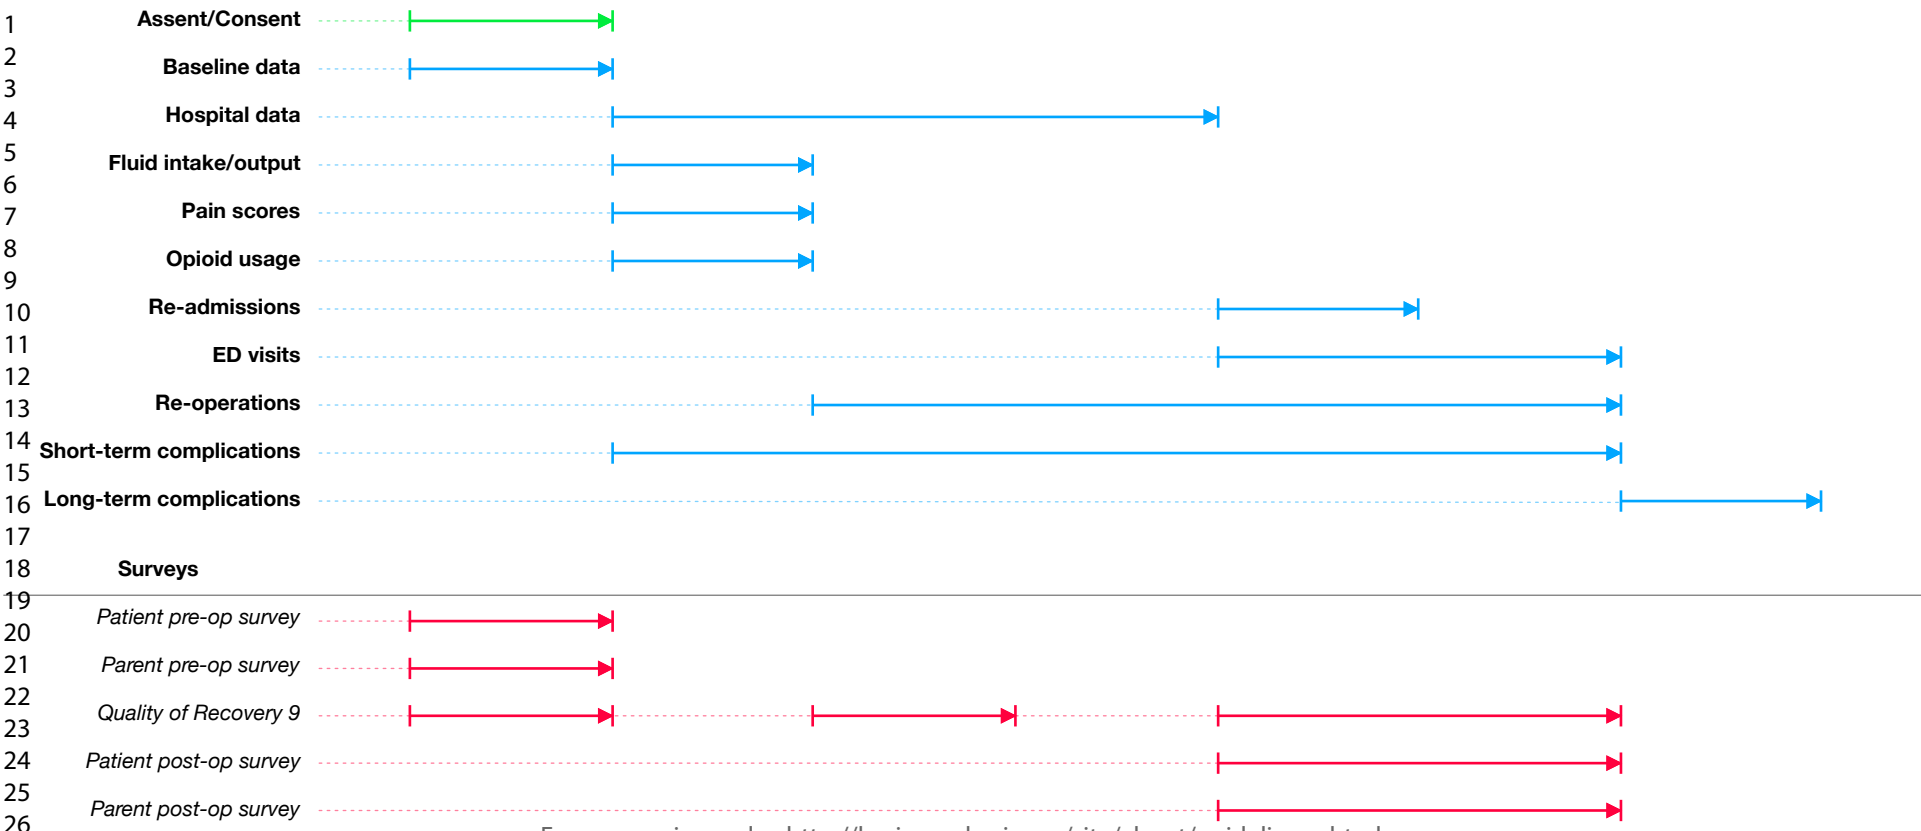

For peer review only - <http://bmjopen.bmj.com/site/about/guidelines.xhtml>

Figure 2. Timeline of patient enrollment, data collection including process and balancing measures, clinical outcomes, and patient-reported outcome measures during the PURSUE study.

**Supplemental Table 1.** Specific definitions of 20 ERAS process measures for pediatric lower urinary tract reconstructive operations.

| Phase of case       | Measure                        | Definition                                                                                                                                                                                                                                                                                                                                                                                                                                                                                                                                                                                                                                                                                                                                                                                                                                                                                                                                                                                                                                                   |
|---------------------|--------------------------------|--------------------------------------------------------------------------------------------------------------------------------------------------------------------------------------------------------------------------------------------------------------------------------------------------------------------------------------------------------------------------------------------------------------------------------------------------------------------------------------------------------------------------------------------------------------------------------------------------------------------------------------------------------------------------------------------------------------------------------------------------------------------------------------------------------------------------------------------------------------------------------------------------------------------------------------------------------------------------------------------------------------------------------------------------------------|
| <i>Preoperative</i> | Counseling about ERAS          | This will typically be done as part of the consent process. Patients/families should not have their sole counseling occur in the preoperative area. Patients/families will be provided a standardized handout on ERAS and what to expect from surgery throughout the process from preoperative all the way through follow up.                                                                                                                                                                                                                                                                                                                                                                                                                                                                                                                                                                                                                                                                                                                                |
|                     | Clear-liquid carbohydrate load | Patients will be provided a commercially-available complex clear liquid carbohydrate liquid preoperatively. Patients will drink 10 mL/kg up to maximum of 350 mL (1 bottle) in the 3 to 2 hours prior to surgery in concert with American Society of Anesthesiologists (ASA) guidelines. If not available, other carbohydrate-rich clear liquids are also permissible on protocol, including Gatorade, PowerAde, Pedialyte. If the patient has a G-tube, these liquids can be administered per G-tube. Water should not be used. Other liquids outside this list are not permissible as part of the protocol.                                                                                                                                                                                                                                                                                                                                                                                                                                                |
|                     | Avoid prolonged fasting        | Patients will remain adherent to ASA guidelines for pediatric patients. These include: solids up to 8 hours, non-human milk up to 6 hours, breast milk up to 4 hours, and clear liquids up to 2 hours prior to surgery. Patients should not be placed on an extended clear liquid diet prior to surgery. Patients should be encouraged to eat and drink normally up to the scheduled <i>nil per os</i> (NPO) guidelines stated above. If the patient does not eat > 24 hours prior to surgery or was placed on an extended clear liquid diet (no solid food on day before surgery) or did not receive normal G-tube feedings, if applicable, patient will not meet this criterion.                                                                                                                                                                                                                                                                                                                                                                           |
|                     | No bowel preparation           | Patients will not receive oral laxatives, suppositories, oral antibiotic agents or other bowel prep agents outside of the patient's normal regimen (if on one). Many patients undergoing urology reconstruction have concomitant neurogenic bowel and are already on bowel programs which may include daily antegrade or retrograde enemas or oral laxatives. These should be maintained up to the day prior to surgery. Patients should be evaluated adequately (clinical history) well in advance of surgery to ensure they are not constipated. Clinical judgement should be used to modify any bowel regimen program at least 4 weeks prior to scheduled OR date.                                                                                                                                                                                                                                                                                                                                                                                        |
|                     | Antibiotic prophylaxis         | Perioperative antibiotics should be administered within the guidelines of the American Urological Association and best hospital practices. AUA guidelines state that prophylaxis should consist of a weight-based dose of 2nd/3rd generation cephalosporin (e.g., cefoxitin) or alternatively an aminoglycoside + metronidazole or clindamycin (e.g. gentamycin + metronidazole) to be administered within 60 minutes of procedure start time (cut time). If patients have allergies or clinical conditions that preclude these, alternatives include ampicillin/sulbactam, ticarcillin/clavulanate, piperacillin/tazobactam or a fluoroquinolone. If patient is felt to have a UTI pre-operatively or has colonization, alternative antibiotic regimens tailored to recent culture results may be used. Antibiotics in most cases should be re-dosed in the operating room according to local standard and be discontinued within 24 hours of surgery per guidelines, but may be continued at the discretion of the surgeon based on clinical circumstance. |
|                     | DVT prophylaxis                | Patients with one or more risk factors should have sequential compression devices (SCDs) placed on the lower extremities prior to induction of anesthesia. This will be verified by intraoperative nursing documentation. Risk factors include obesity (BMI $\geq$ 30), age $\geq$ 14, history of malignancy, or history of venous thromboembolic event. Patients who do not have any risk factors may safely omit any prophylaxis per standard of care. SCDs should be removed at the end of the case to encourage early mobility once reaching the surgical floor.                                                                                                                                                                                                                                                                                                                                                                                                                                                                                         |

| Phase of case  | Measure                | Definition                                                                                                                                                                                                                                                                                                                                                                                                                                                                                                                                                                                                                                                                                                                                                                                                                                                                                                                                                                                                                                                                                                                                                                                                                                                                                                                                                                                                                                                                                                                                                                                                                                                                                                                                                                                                                                                                                                                                                                                                                                                                                                                                                                                                                                                                                                                                                                                                                                                                                                                                 |
|----------------|------------------------|--------------------------------------------------------------------------------------------------------------------------------------------------------------------------------------------------------------------------------------------------------------------------------------------------------------------------------------------------------------------------------------------------------------------------------------------------------------------------------------------------------------------------------------------------------------------------------------------------------------------------------------------------------------------------------------------------------------------------------------------------------------------------------------------------------------------------------------------------------------------------------------------------------------------------------------------------------------------------------------------------------------------------------------------------------------------------------------------------------------------------------------------------------------------------------------------------------------------------------------------------------------------------------------------------------------------------------------------------------------------------------------------------------------------------------------------------------------------------------------------------------------------------------------------------------------------------------------------------------------------------------------------------------------------------------------------------------------------------------------------------------------------------------------------------------------------------------------------------------------------------------------------------------------------------------------------------------------------------------------------------------------------------------------------------------------------------------------------------------------------------------------------------------------------------------------------------------------------------------------------------------------------------------------------------------------------------------------------------------------------------------------------------------------------------------------------------------------------------------------------------------------------------------------------|
| Intraoperative | Regional anesthesia    | <p>Standard clinical judgement of the multidisciplinary team (urologists, anesthesia) in concert with patient/family wishes should be used to offer regional catheter-based anesthesia to all patients. Options include wound soakers, transversus abdominus plane (TAP) catheters, quadratus lumborum (QL) catheters, erector spinae plane (ESP) catheters, or epidural. If planning wound soakers, TAP/QL/ESP catheters at the end of the case, preoperative TAP blocks performed by anesthesia using 0.2 mL/kg of 0.2–0.5% Ropivacaine should be injected on each side under ultrasound guidance. Wound soakers, TAP catheters, quadratus lumborum catheters or wound catheter pain pumps should be filled with 0.2% ropivacaine and connected to an epidural infusion pump to provide a continuous rate determined by the patient's weight (0.05 mL/kg/hr, maximum 0.5 mg/kg/hr). The infusion rate can be adjusted or stopped to monitor alternative analgesics prior to catheter removal.</p> <p>Epidurals can be run according to standard of care at each institution, although by protocol should not include a narcotic/opioid. Initial concentrations and rates for all regional anesthetic regimens will be documented. Duration of therapy will be documented.</p> <p>Wound soakers, TAP/QL/ESP catheters, and epidural catheters are to be left in place up to 5 days post-operatively or at clinical discretion of treating physicians within standard of care. They can be removed on day of discharge. Those left in longer than day 5 should have documented reason. Drainage around pain catheters can occur. This is normal. Dressings should be reinforced prior to scheduled removal. The risk of infection of pain catheters is generally small, but if concern exists, clinical judgement should be used as to the disposition of the pain catheters and documented.</p> <p>If none of the above are deemed clinically appropriate, bilateral transversus abdominis plane (TAP) blocks, caudal blocks or paravertebral blocks can be performed by the surgical or anesthesia team either through the surgical field or ultrasound guided. These do not count, however, for this protocol item given their limited duration of effectiveness for the patient. Blocks (as opposed to catheter-based postoperative therapies) do not provide continuous post-operative anesthesia to the wound beyond 6-12 hours. Justification of the use of blocks over other continuous regional options should be documented.</p> |
|                | Avoiding excess drains | <p>There is wide variability in the use of surgical drains by surgeons, according to local practice, experience and clinical scenario. Urologic reconstruction, though, typically requires drains in the form of catheters across newly-constructed catheterizable channels or catheters to drain the urinary tract to keep it under low pressure during healing. To meet this criterion, patients should not have a drain placed intraabdominally, in the space of Retzius, or subcutaneously. Acceptable catheters include: suprapubic tube, antegrade continence enema channel, appendicovesicostomy/ileovesicostomy/colovesicostomy, and/or urethral catheters. The duration of therapy will be according to surgeon preference.</p>                                                                                                                                                                                                                                                                                                                                                                                                                                                                                                                                                                                                                                                                                                                                                                                                                                                                                                                                                                                                                                                                                                                                                                                                                                                                                                                                                                                                                                                                                                                                                                                                                                                                                                                                                                                                   |

| Phase of case | Measure                       | Definition                                                                                                                                                                                                                                                                                                                                                                                                                                                                                                                                                                                                                                                                                                                                                                                                                                                                                                                                                                                                                                                                                                                                                                                                                                                                                                                                                                                                                                                                                                                                  |
|---------------|-------------------------------|---------------------------------------------------------------------------------------------------------------------------------------------------------------------------------------------------------------------------------------------------------------------------------------------------------------------------------------------------------------------------------------------------------------------------------------------------------------------------------------------------------------------------------------------------------------------------------------------------------------------------------------------------------------------------------------------------------------------------------------------------------------------------------------------------------------------------------------------------------------------------------------------------------------------------------------------------------------------------------------------------------------------------------------------------------------------------------------------------------------------------------------------------------------------------------------------------------------------------------------------------------------------------------------------------------------------------------------------------------------------------------------------------------------------------------------------------------------------------------------------------------------------------------------------|
|               | Euvolemia                     | <p>Hydration statuses of patients can vary greatly and are highly dependent on pre-operative fasting conditions, concomitant medical diagnoses like diabetes insipidus, and intraoperative fluid shifts related to insensible losses from an open abdomen, urine output and blood loss. Surgery involving the genitourinary tract can often be difficult because urine output cannot be recorded accurately throughout the case, which is often an indicator of fluid status and response to intraoperative intravenous fluid resuscitation. The goal is to maintain euvolemia and avoid bowel edema and subsequent ileus while maintaining safe cardiopulmonary function, end organ perfusion and offsetting bodily fluid and insensible losses.</p> <p>To meet this criterion, a goal of an average intravenous fluid volume between 3 and 7 mL/kg/hr as calculated according to the patient's preoperative weight and time from in room time to out of room time. Blood loss not requiring transfusion can be replenished in a 3:1 ratio of crystalloid to blood or 1:1 ratio of colloid to blood. Intravenous pressors should be considered to improve hemodynamics as opposed to fluid boluses. Some patients with preexisting comorbidities like diabetes insipidus may require greater than usual fluid volumes to maintain euvolemia. Such instances should be well-documented and justified.</p>                                                                                                                                   |
|               | Normothermia                  | <p>Patient's temperature should be maintained between 36°C to 38°C throughout the intraoperative period (skin-to-skin time). This can be done with a combination of warming blanket and/or alteration of the operating room environmental controls. To minimize variability, esophageal temperature monitoring should be used. Anesthesia record will be used to verify this item. Any value outside this range will not count.</p>                                                                                                                                                                                                                                                                                                                                                                                                                                                                                                                                                                                                                                                                                                                                                                                                                                                                                                                                                                                                                                                                                                         |
|               | Minimizing opioids            | <p>There is no well-accepted clinical standard for minimizing intraoperative opioids. Data gathered during a pilot study were used as a basis for this definition. Patients will have met this criterion if they receive &lt; 0.3 mg/kg IV morphine equivalents intraoperatively. This is equivalent to a total of 3.6 mcg/kg fentanyl IV. As a guideline for intraoperative opioid usage, providers may opt for no intraoperative opioids so long as the patient has some form of regional anesthesia on board starting at the beginning of the case and they show no signs of pain response. Alternatively, we recommend fentanyl may be administered in 1-2 mcg/kg doses with induction, prior to incision, and as deemed appropriate throughout the procedure by the anesthesiologist for analgesia. Opioids should only be used if clinically indicated. This total dosage equates to about 75% of mean post-operative day 0 IV morphine equivalent usage across all patients in the Phase I/II study. The last 25% of mean post-operative day 0 IV morphine equivalent is allocated toward post-operative pain control in the recovery unit or hospital ward.</p> <p>Patients should have their pain adequately controlled as necessary in accordance with standard of care. If pain assessments determine there is inadequate pain control, all pain pathway items should be reassessed by nursing, surgical and anesthesia teams to maximize pain control as best as possible in accordance to the ERAS pathway where possible.</p> |
|               | Minimally-invasive assistance | <p>Where technically and clinically feasible, surgeons should endeavor to perform part of the surgery with either laparoscopic or robotic assistance. In many cases, the cecum, appendix and terminal ileum can be mobilized into the pelvis to allow for reconstruction through a smaller muscle-splitting Pfannenstiel incision with minimization of time the peritoneum is open. This minimizes insensible fluid losses and fluid shifts. Surgeon judgement and experience will heavily influence this part of the pathway, but should be given consideration. If laparoscopic or robotic assistance is used in any part, this criterion will be met. Of note, this item is not meant to indicate that the entire operation need be done laparoscopically or robotically. Surgeon judgement is paramount.</p>                                                                                                                                                                                                                                                                                                                                                                                                                                                                                                                                                                                                                                                                                                                            |

| Phase of case        | Measure                                       | Definition                                                                                                                                                                                                                                                                                                                                                                                                                                                                                                                                                                                                                                                                   |
|----------------------|-----------------------------------------------|------------------------------------------------------------------------------------------------------------------------------------------------------------------------------------------------------------------------------------------------------------------------------------------------------------------------------------------------------------------------------------------------------------------------------------------------------------------------------------------------------------------------------------------------------------------------------------------------------------------------------------------------------------------------------|
|                      | No nasogastric tube on leaving operating room | No nasogastric (NG) tube shall be placed intraoperatively by the anesthesia team. An orogastric (OG) tube may be placed temporarily to drain stomach contents if felt necessary, but should be otherwise avoided. Placement of OG intraoperatively by definition must be removed at the end of surgery. Placement of NG tube on leaving the OR shall be documented and not qualify for this item. Patients who develop ileus and clinically require NG tube during the post-operative period still qualify for this item if no NG tube was used on leaving the OR. Such patients will require documentation of circumstances of secondary NG tube placement.                 |
| <b>Postoperative</b> | Nausea/vomiting prevention                    | Patients without clinical contraindications shall be written for weight-based anti-nausea prophylaxis, typically ondansetron to be given as needed on admission to the PACU or floor. Orders will be used to verify this item. Alternatives to ondansetron such as promethazine, diphenhydramine or a scopolamine patch may be used at the discretion of the ordering physician. Regimen will be documented.                                                                                                                                                                                                                                                                 |
|                      | Early feeding                                 | Patients should receive clear liquids on the evening of surgery (counted as postoperative day 0) and regular diet starting on day after surgery (postoperative day 1). Regular diet should have no restrictions outside of clinically-indicated patient needs (e.g., soft, bland, purée, etc.). Presence of orders to this effect on the specified days will be used to verify this item.                                                                                                                                                                                                                                                                                    |
|                      | Early mobilization                            | Patients should be out of bed in some fashion on post-operative day 1. This may include transfer to a chair, ambulation with or without assistance as deemed clinically safe and feasible by the surgical team and nursing staff. Patients who do not get out of bed will not have met this criterion. Similarly, sitting on the edge of the hospital bed is not considered sufficient to meet this criterion. Activity should be encouraged and increased each subsequent hospital day. Nursing documentation of activity will be used to verify this item.                                                                                                                 |
|                      | Adjunctive pain medication                    | Patients should be scheduled initially (not written prn or as needed) to receive a weight-based based dose of acetaminophen and/or NSAID therapy. These may be given orally or parenterally. To meet this item, these should be scheduled after surgery for 24 hours and can then be transitioned to as needed at the discretion of the care team. If these are written as needed on leaving the operating room, patient will not receive credit for this item. In accordance with clinical standard of care, patients who have contraindications to receiving either medication (e.g. allergy, liver disease, chronic kidney disease, etc.) should not be written for them. |
|                      | Early stoppage of intravenous fluids          | Patients who have tolerated oral intake (no prerequisite amount is defined) and who are clinically stable according to standard of care should have their intravenous maintenance fluids turned off (saline locked) by post-operative day 2. "To Keep Open" or TKO rates are permissible. Patients who are not well, are vomiting, have ileus or have an NG tube should not have their IV fluids removed and will not meet this criterion.                                                                                                                                                                                                                                   |
|                      | Early removal of extra drains/catheters       | If no drain was left outside the urinary tract at the time of surgery, then the patient will automatically qualify for this ERAS protocol item. If a drain was left intentionally outside the urinary tract, then it should be removed by or on post-operative day 4. If there are clinical circumstances that require the drain be continued, then the clinical team should keep it in place and document reasoning.                                                                                                                                                                                                                                                        |



| Phase of case | Measure            | Definition                                                                                                                                                                                                                                                                                                                                                                                                                                                                                                                                                                                                                                                                                                                                                                                                                                                                                    |
|---------------|--------------------|-----------------------------------------------------------------------------------------------------------------------------------------------------------------------------------------------------------------------------------------------------------------------------------------------------------------------------------------------------------------------------------------------------------------------------------------------------------------------------------------------------------------------------------------------------------------------------------------------------------------------------------------------------------------------------------------------------------------------------------------------------------------------------------------------------------------------------------------------------------------------------------------------|
|               | Minimizing opioids | <p>There is no well-accepted clinical standard for minimizing postoperative opioids. Data gathered during a pilot study were used as a basis for this definition in addition to prior study data regarding the decreased need for postoperative opioids in the setting of wound soakers. Patients will have met this criterion if they receive &lt; 0.15 mg/kg/day IV morphine equivalents averaged over the first 3 post-operative days. This equates to less than all the postoperative IV morphine equivalent usage for 11 of 13 patients in the pilot study, where nurses were informed to use opioids only for breakthrough pain control. This is equivalent to an average of 3 weight-appropriate doses of IV morphine, IV hydromorphone or oxycodone per day. Communication with nursing staff (day and night shift nurses) and anesthesia team is key to minimizing opioid usage.</p> |
|               |                    | <p>Patients should have their pain adequately controlled as necessary in accordance with standard of care. If pain assessments determine there is inadequate pain control, all pain pathway items should be reassessed by nursing, surgical and anesthesia teams to maximize pain control as best as possible in accordance to the ERAS pathway where possible.</p>                                                                                                                                                                                                                                                                                                                                                                                                                                                                                                                           |

**Consent and Authorization Form**

17-1176 Consent  
June 2019  
Kyle Rove

**Principal Investigator:** Kyle Rove, MD  
**COMIRB No:** 17-1176  
**Version Date:** June 2019

**Study Title:** Multicenter Pilot and Exploration Study of Enhanced Recovery After Surgery (ERAS) in Patients Undergoing Urologic Reconstructive Surgery

You are being asked to be in a research study. 'You' refers to the pediatric patient. This form provides you with information about the study. A member of the research team will describe this study to you and answer all of your questions. Please read the information below and ask questions about anything you don't understand before deciding whether or not to take part.

**Why is this study being done?**

The purpose of this research study is to evaluate procedures we have implemented to potentially speed up recovery after urologic surgery. We are interested in speed of recovery (how quickly pain improves, length of time in the hospital, and need for additional pain control).

You are being asked to be in this research study because you or your child is going to have bladder surgery requiring hospitalization. Up to 60 people will participate in the study at Children's Hospital Colorado. The study is being done at other sites around the United States. Approximately 500 people will take part in this study across all sites.

**What happens if I join this study?**

If you join the study, we will ask you to complete a survey about yourself before your surgery and another afterwards. We will collect health information from your medical record about your surgery and your recovery continually for 1 year after your surgery. You may skip any question which makes you uncomfortable.

**What are the possible discomforts or risks?**

One risk of participating in this study is that confidential information about you may be accidentally disclosed. We will use our best efforts to keep the information about you secure.

To help protect your confidentiality, we will assign a study identification number to your data. We will separate information that identifies you from the rest of the study data and store all the data securely in an electronic database. If we write a report or article about this study or share the study data set with others, we will do so in such a way that you cannot be directly identified.

## Consent and Authorization Form

17-1176 Consent  
June 2019  
Kyle Rove

There are no other known risks from being in this study, and you will not benefit personally. However, we hope that others may benefit in the future from what we learn as a result of this study.

### **Will I be paid for being in the study? Will I have to pay for anything?**

You will not have any costs for being in this research study and you will not be paid.

### **Is my participation voluntary?**

Taking part in this study is voluntary. You have the right to choose not to take part in this study. If you choose to take part, you have the right to stop at any time. If you refuse or decide to withdraw later, you will not lose any benefits or rights to which you are entitled.

If there are any new findings during the study that may affect whether you want to continue to take part, you will be told about them.

### **Who do I call if I have questions?**

The researcher carrying out this study is Dr. Kyle Rove. You may ask any questions you have now. If you have questions later, you may call Dr. Kyle Rove at 720-777-6146.

You may have questions about your rights as someone in this study. You can call Dr. Kyle Rove with questions. You can also call the Multiple Institutional Review Board (IRB). You can call them at 303-724-1055.

### **Who will see my research information?**

The University of Colorado Denver and its affiliated hospital(s) it works with have rules to protect information about you. Federal and state laws including the Health Insurance Portability and Accountability Act (HIPAA) also protect your privacy. This part of the consent form tells you what information about you may be collected in this study and who might see or use it.

The institutions involved in this study include:

- University of Colorado Denver
- Children's Hospital Colorado

Children's Hospital Colorado shares a medical record system with the Barbara Davis Center and PedsConnect; therefore, it is also possible that other healthcare professionals could view your information.

## Consent and Authorization Form

17-1176 Consent  
June 2019  
Kyle Rove

We cannot do this study without your permission to see, use and give out your information. You do not have to give us this permission. If you do not, then you may not join this study.

We will see, use and disclose your information only as described in this form and in our Notice of Privacy Practices; however, people outside the University of Colorado Denver and its affiliate hospitals may not be covered by this promise.

We will do everything we can to keep your records a secret. It cannot be guaranteed.

The use and disclosure of your information has no time limit. You can cancel your permission to use and disclose your information at any time by writing to the study's Primary Investigator, at the name and address listed below. If you do cancel your permission to use and disclose your information, your part in this study will end and no further information about you will be collected. Your cancellation would not affect information already collected in this study.

Kyle Rove, MD  
Children's Hospital Colorado  
13123 East 16<sup>th</sup> Avenue B463  
Aurora, CO 80045

Both the research records that identify you and the consent form signed by you may be looked at by others who have a legal right to see that information.

- Federal offices such as the Food and Drug Administration (FDA) that protect research subjects like you.
- People at the Colorado Multiple Institutional Review Board (COMIRB)
- The study doctor and the rest of the study team.
- Officials at the institution where the research is being conducted and officials at other institutions involved in this study who are in charge of making sure that we follow all of the rules for research

The investigator (or staff acting on behalf of the investigator) will use your information for the research outlined in this consent form. They will also make *all or some* of the following health information about you collected in this study available to:

- St. Louis Children's Hospital
- Washington University in St. Louis

## Consent and Authorization Form

17-1176 Consent  
June 2019  
Kyle Rove

Your information may be used and disclosed, to do the research, to study the results, and to make sure that the research was done right.

We might talk about this research study at meetings. We might also print the results of this research study in relevant journals. But we will always keep the names of the research subjects, like you, private.

You have the right to request access to your personal health information from the Investigator.

### Information about you that will be seen, collected, used and disclosed in this study:

- Name and Demographic Information (age, sex, ethnicity, address, phone number, etc).
- Portions of your previous and current Medical Records that are relevant to this study, including but not limited to Diagnosis(es), History and Physical, laboratory or tissue studies, radiology studies, procedure results
- Research Visit and Research Test records

### Agreement to be in this study and use my data

I have read this paper about the study or it was read to me. I understand the possible risks and benefits of this study. I understand and authorize the access, use and disclosure of my information as stated in this form. I know that being in this study is voluntary. I choose to be in this study: I will get a signed and dated copy of this consent form.

Child's Name \_\_\_\_\_ Child's Date of Birth \_\_\_\_\_

Parent Signature: \_\_\_\_\_ Date: \_\_\_\_\_

Print Name: \_\_\_\_\_

Subject (age 13-18 years) Signature: \_\_\_\_\_ Date \_\_\_\_\_

Consent form explained by: \_\_\_\_\_ Date: \_\_\_\_\_

Print Name: \_\_\_\_\_

**Consent and Authorization Form**

17-1176 Consent  
June 2019  
Kyle Rove

Signature Line for witness for consent of non-reading subjects and consent using a short form, if you requested such consent procedures (see Application section L)]

\_\_\_\_\_ Date\_\_\_\_\_

Print Name: \_\_\_\_\_

Witness of Signature

Witness of consent process

For peer review only

## COMIRB Assent

**COMIRB #: 17-1176****Person in Charge of the Study: Kyle Rove, MD****Version Date: September 2018****Assent Form for: Multicenter Pilot and Exploration Study of Enhanced Recovery After Surgery (ERAS) in Patients Undergoing Urologic Reconstructive Surgery****What is this study about?**

I am being asked if I want to be in this research study. The goal of this study is to find out more about how we can speed up recovery after your surgery.

**Why are you asking me?**

I am being asked to be in the study because I am going to have surgery in my abdomen.

**What Do I Have to Do or What Will Happen to Me?**

If I am in the study, the researchers will collect information about my surgery, recovery and pain levels for a year after my hospitalization. I will be asked to answer a short survey once before and again after surgery.

This study does not involve anything that might hurt or upset me. The questionnaire I will complete will ask about my school and about how I am doing before and after surgery.

**Can I ask Questions?**

I asked any questions I have now about the study. All my questions were answered.

I know that if I have a question later, I can ask and get an answer. If I want to, I can call Dr Rove at 720-777-5839.

**Do I Have to Do This?**

I know that I do not have to be in this study. No one will be mad at me if I say no.

I want to be in the study at this time.  yes  no

I will get a copy of this form to keep.

*Child's Printed Name:* \_\_\_\_\_

*Child's Signature:* \_\_\_\_\_

*Date:* \_\_\_\_\_

*I have explained the research at a level that is understandable by the child and believe that the child understands what is expected during this study.*

*Signature of Person Obtaining Assent:* \_\_\_\_\_ *Date:* \_\_\_\_\_

# Reporting checklist for protocol of a clinical trial.

Based on the SPIRIT guidelines.

## Instructions to authors

Complete this checklist by entering the page numbers from your manuscript where readers will find each of the items listed below.

Your article may not currently address all the items on the checklist. Please modify your text to include the missing information. If you are certain that an item does not apply, please write "n/a" and provide a short explanation.

Upload your completed checklist as an extra file when you submit to a journal.

In your methods section, say that you used the SPIRIT reporting guidelines, and cite them as:

Chan A-W, Tetzlaff JM, Altman DG, Laupacis A, Gøtzsche PC, Krleža-Jerić K, Hróbjartsson A, Mann H, Dickersin K, Berlin J, Doré C, Parulekar W, Summerskill W, Groves T, Schulz K, Sox H, Rockhold FW, Rennie D, Moher D. SPIRIT 2013 Statement: Defining standard protocol items for clinical trials. *Ann Intern Med.* 2013;158(3):200-207

|                                   | Reporting Item                                                                                                                  | Page Number                                                                                          |
|-----------------------------------|---------------------------------------------------------------------------------------------------------------------------------|------------------------------------------------------------------------------------------------------|
| <b>Administrative information</b> |                                                                                                                                 |                                                                                                      |
| Title                             | <a href="#">#1</a> Descriptive title identifying the study design, population, interventions, and, if applicable, trial acronym | 1                                                                                                    |
| Trial registration                | <a href="#">#2a</a> Trial identifier and registry name. If not yet registered, name of intended registry                        | 2, 11, 16                                                                                            |
| Trial registration: data set      | <a href="#">#2b</a> All items from the World Health Organization Trial Registration Data Set                                    | n/a - these are all listed on the <a href="http://clinicaltrials.gov">clinicaltrials.gov</a> website |
| Protocol version                  | <a href="#">#3</a> Date and version identifier                                                                                  | 1                                                                                                    |
| Funding                           | <a href="#">#4</a> Sources and types of financial, material, and other support                                                  | 16                                                                                                   |
| Roles and responsibilities:       | <a href="#">#5a</a> Names, affiliations, and roles of protocol contributors                                                     | 16                                                                                                   |



1 contributorship

2 Roles and [#5b](#) Name and contact information for the trial n/a - this is an investigator-  
 3 responsibilities: sponsor initiated study  
 4 sponsor contact  
 5 information  
 6  
 7  
 8

9 Roles and [#5c](#) Role of study sponsor and funders, if any, in 16  
 10 responsibilities: study design; collection, management,  
 11 sponsor and funder analysis, and interpretation of data; writing of  
 12 the report; and the decision to submit the  
 13 report for publication, including whether they  
 14 will have ultimate authority over any of these  
 15 activities  
 16  
 17  
 18  
 19

20 Roles and [#5d](#) Composition, roles, and responsibilities of 16  
 21 responsibilities: the coordinating centre, steering committee,  
 22 committees endpoint adjudication committee, data  
 23 management team, and other individuals or  
 24 groups overseeing the trial, if applicable (see  
 25 Item 21a for data monitoring committee)  
 26  
 27  
 28  
 29

## 30 Introduction

31  
 32 Background and [#6a](#) Description of research question and 4  
 33 rationale justification for undertaking the trial,  
 34 including summary of relevant studies  
 35 (published and unpublished) examining  
 36 benefits and harms for each intervention  
 37  
 38  
 39  
 40

41 Background and [#6b](#) Explanation for choice of comparators 14  
 42 rationale: choice of  
 43 comparators  
 44  
 45

46 Objectives [#7](#) Specific objectives or hypotheses 9  
 47  
 48

49 Trial design [#8](#) Description of trial design including type of 6  
 50 trial (eg, parallel group, crossover, factorial,  
 51 single group), allocation ratio, and  
 52 framework (eg, superiority, equivalence, non-  
 53 inferiority, exploratory)  
 54  
 55  
 56

## 57 Methods: 58 Participants,

**interventions, and  
outcomes**

|    |                      |                                                   |                                      |
|----|----------------------|---------------------------------------------------|--------------------------------------|
| 1  |                      |                                                   |                                      |
| 2  |                      |                                                   |                                      |
| 3  |                      |                                                   |                                      |
| 4  | Study setting        | <a href="#">#9</a>                                | 10                                   |
| 5  |                      | Description of study settings (eg, community      |                                      |
| 6  |                      | clinic, academic hospital) and list of            |                                      |
| 7  |                      | countries where data will be collected.           |                                      |
| 8  |                      | Reference to where list of study sites can be     |                                      |
| 9  |                      | obtained                                          |                                      |
| 10 |                      |                                                   |                                      |
| 11 |                      |                                                   |                                      |
| 12 | Eligibility criteria | <a href="#">#10</a>                               | 10                                   |
| 13 |                      | Inclusion and exclusion criteria for              |                                      |
| 14 |                      | participants. If applicable, eligibility criteria |                                      |
| 15 |                      | for study centres and individuals who will        |                                      |
| 16 |                      | perform the interventions (eg, surgeons,          |                                      |
| 17 |                      | psychotherapists)                                 |                                      |
| 18 |                      |                                                   |                                      |
| 19 |                      |                                                   |                                      |
| 20 | Interventions:       | <a href="#">#11a</a>                              | 6-8                                  |
| 21 | description          | Interventions for each group with sufficient      |                                      |
| 22 |                      | detail to allow replication, including how and    |                                      |
| 23 |                      | when they will be administered                    |                                      |
| 24 |                      |                                                   |                                      |
| 25 |                      |                                                   |                                      |
| 26 | Interventions:       | <a href="#">#11b</a>                              | 17-18                                |
| 27 | modifications        | Criteria for discontinuing or modifying           |                                      |
| 28 |                      | allocated interventions for a given trial         |                                      |
| 29 |                      | participant (eg, drug dose change in response     |                                      |
| 30 |                      | to harms, participant request, or improving /     |                                      |
| 31 |                      | worsening disease)                                |                                      |
| 32 |                      |                                                   |                                      |
| 33 |                      |                                                   |                                      |
| 34 | Interventions:       | <a href="#">#11c</a>                              | 15-16                                |
| 35 | adherence            | Strategies to improve adherence to                |                                      |
| 36 |                      | intervention protocols, and any procedures        |                                      |
| 37 |                      | for monitoring adherence (eg, drug tablet         |                                      |
| 38 |                      | return; laboratory tests)                         |                                      |
| 39 |                      |                                                   |                                      |
| 40 |                      |                                                   |                                      |
| 41 | Interventions:       | <a href="#">#11d</a>                              | n/a - this is an observational study |
| 42 | concomitant care     | Relevant concomitant care and interventions       |                                      |
| 43 |                      | that are permitted or prohibited during the       |                                      |
| 44 |                      | trial                                             |                                      |
| 45 |                      |                                                   |                                      |
| 46 | Outcomes             | <a href="#">#12</a>                               | 13                                   |
| 47 |                      | Primary, secondary, and other outcomes,           |                                      |
| 48 |                      | including the specific measurement variable       |                                      |
| 49 |                      | (eg, systolic blood pressure), analysis metric    |                                      |
| 50 |                      | (eg, change from baseline, final value, time to   |                                      |
| 51 |                      | event), method of aggregation (eg, median,        |                                      |
| 52 |                      | proportion), and time point for each outcome.     |                                      |
| 53 |                      | Explanation of the clinical relevance of          |                                      |
| 54 |                      | chosen efficacy and harm outcomes is              |                                      |
| 55 |                      | strongly recommended                              |                                      |
| 56 |                      |                                                   |                                      |
| 57 |                      |                                                   |                                      |
| 58 |                      |                                                   |                                      |
| 59 |                      |                                                   |                                      |

|    |                           |                      |                                                                                                                                                                                                                                                                                                                                                                               |                                            |
|----|---------------------------|----------------------|-------------------------------------------------------------------------------------------------------------------------------------------------------------------------------------------------------------------------------------------------------------------------------------------------------------------------------------------------------------------------------|--------------------------------------------|
| 1  | Participant timeline      | <a href="#">#13</a>  | Time schedule of enrolment, interventions<br>(including any run-ins and washouts),<br>assessments, and visits for participants. A<br>schematic diagram is highly recommended<br>(see Figure)                                                                                                                                                                                  | 14                                         |
| 2  |                           |                      |                                                                                                                                                                                                                                                                                                                                                                               |                                            |
| 3  |                           |                      |                                                                                                                                                                                                                                                                                                                                                                               |                                            |
| 4  |                           |                      |                                                                                                                                                                                                                                                                                                                                                                               |                                            |
| 5  |                           |                      |                                                                                                                                                                                                                                                                                                                                                                               |                                            |
| 6  |                           |                      |                                                                                                                                                                                                                                                                                                                                                                               |                                            |
| 7  |                           |                      |                                                                                                                                                                                                                                                                                                                                                                               |                                            |
| 8  |                           |                      |                                                                                                                                                                                                                                                                                                                                                                               |                                            |
| 9  | Sample size               | <a href="#">#14</a>  | Estimated number of participants needed to<br>achieve study objectives and how it was<br>determined, including clinical and statistical<br>assumptions supporting any sample size<br>calculations                                                                                                                                                                             | 14                                         |
| 10 |                           |                      |                                                                                                                                                                                                                                                                                                                                                                               |                                            |
| 11 |                           |                      |                                                                                                                                                                                                                                                                                                                                                                               |                                            |
| 12 |                           |                      |                                                                                                                                                                                                                                                                                                                                                                               |                                            |
| 13 |                           |                      |                                                                                                                                                                                                                                                                                                                                                                               |                                            |
| 14 |                           |                      |                                                                                                                                                                                                                                                                                                                                                                               |                                            |
| 15 |                           |                      |                                                                                                                                                                                                                                                                                                                                                                               |                                            |
| 16 |                           |                      |                                                                                                                                                                                                                                                                                                                                                                               |                                            |
| 17 | Recruitment               | <a href="#">#15</a>  | Strategies for achieving adequate participant<br>enrolment to reach target sample size                                                                                                                                                                                                                                                                                        | 11                                         |
| 18 |                           |                      |                                                                                                                                                                                                                                                                                                                                                                               |                                            |
| 19 |                           |                      |                                                                                                                                                                                                                                                                                                                                                                               |                                            |
| 20 |                           |                      |                                                                                                                                                                                                                                                                                                                                                                               |                                            |
| 21 | <b>Methods:</b>           |                      |                                                                                                                                                                                                                                                                                                                                                                               |                                            |
| 22 | <b>Assignment of</b>      |                      |                                                                                                                                                                                                                                                                                                                                                                               |                                            |
| 23 | <b>interventions (for</b> |                      |                                                                                                                                                                                                                                                                                                                                                                               |                                            |
| 24 | <b>controlled trials)</b> |                      |                                                                                                                                                                                                                                                                                                                                                                               |                                            |
| 25 |                           |                      |                                                                                                                                                                                                                                                                                                                                                                               |                                            |
| 26 |                           |                      |                                                                                                                                                                                                                                                                                                                                                                               |                                            |
| 27 |                           |                      |                                                                                                                                                                                                                                                                                                                                                                               |                                            |
| 28 | Allocation:               | <a href="#">#16a</a> | Method of generating the allocation sequence<br>(eg, computer-generated random numbers),<br>and list of any factors for stratification. To<br>reduce predictability of a random sequence,<br>details of any planned restriction (eg,<br>blocking) should be provided in a separate<br>document that is unavailable to those who<br>enrol participants or assign interventions | n/a - not a randomized controlled<br>trial |
| 29 | sequence generation       |                      |                                                                                                                                                                                                                                                                                                                                                                               |                                            |
| 30 |                           |                      |                                                                                                                                                                                                                                                                                                                                                                               |                                            |
| 31 |                           |                      |                                                                                                                                                                                                                                                                                                                                                                               |                                            |
| 32 |                           |                      |                                                                                                                                                                                                                                                                                                                                                                               |                                            |
| 33 |                           |                      |                                                                                                                                                                                                                                                                                                                                                                               |                                            |
| 34 |                           |                      |                                                                                                                                                                                                                                                                                                                                                                               |                                            |
| 35 |                           |                      |                                                                                                                                                                                                                                                                                                                                                                               |                                            |
| 36 |                           |                      |                                                                                                                                                                                                                                                                                                                                                                               |                                            |
| 37 |                           |                      |                                                                                                                                                                                                                                                                                                                                                                               |                                            |
| 38 |                           |                      |                                                                                                                                                                                                                                                                                                                                                                               |                                            |
| 39 |                           |                      |                                                                                                                                                                                                                                                                                                                                                                               |                                            |
| 40 |                           |                      |                                                                                                                                                                                                                                                                                                                                                                               |                                            |
| 41 | Allocation                | <a href="#">#16b</a> | Mechanism of implementing the allocation<br>sequence (eg, central telephone; sequentially<br>numbered, opaque, sealed envelopes),<br>describing any steps to conceal the sequence<br>until interventions are assigned                                                                                                                                                         | n/a - not a randomized controlled<br>trial |
| 42 | concealment               |                      |                                                                                                                                                                                                                                                                                                                                                                               |                                            |
| 43 | mechanism                 |                      |                                                                                                                                                                                                                                                                                                                                                                               |                                            |
| 44 |                           |                      |                                                                                                                                                                                                                                                                                                                                                                               |                                            |
| 45 |                           |                      |                                                                                                                                                                                                                                                                                                                                                                               |                                            |
| 46 |                           |                      |                                                                                                                                                                                                                                                                                                                                                                               |                                            |
| 47 |                           |                      |                                                                                                                                                                                                                                                                                                                                                                               |                                            |
| 48 |                           |                      |                                                                                                                                                                                                                                                                                                                                                                               |                                            |
| 49 | Allocation:               | <a href="#">#16c</a> | Who will generate the allocation sequence,<br>who will enrol participants, and who will<br>assign participants to interventions                                                                                                                                                                                                                                               | n/a - not a randomized controlled<br>trial |
| 50 | implementation            |                      |                                                                                                                                                                                                                                                                                                                                                                               |                                            |
| 51 |                           |                      |                                                                                                                                                                                                                                                                                                                                                                               |                                            |
| 52 |                           |                      |                                                                                                                                                                                                                                                                                                                                                                               |                                            |
| 53 |                           |                      |                                                                                                                                                                                                                                                                                                                                                                               |                                            |
| 54 |                           |                      |                                                                                                                                                                                                                                                                                                                                                                               |                                            |
| 55 | Blinding (masking)        | <a href="#">#17a</a> | Who will be blinded after assignment to<br>interventions (eg, trial participants, care<br>providers, outcome assessors, data analysts),                                                                                                                                                                                                                                       | n/a - not a randomized controlled<br>trial |
| 56 |                           |                      |                                                                                                                                                                                                                                                                                                                                                                               |                                            |
| 57 |                           |                      |                                                                                                                                                                                                                                                                                                                                                                               |                                            |
| 58 |                           |                      |                                                                                                                                                                                                                                                                                                                                                                               |                                            |
| 59 |                           |                      |                                                                                                                                                                                                                                                                                                                                                                               |                                            |
| 60 |                           |                      |                                                                                                                                                                                                                                                                                                                                                                               |                                            |

and how

1  
2  
3 Blinding (masking): [#17b](#) If blinded, circumstances under which n/a - not a randomized controlled  
4 emergency unblinding is permissible, and procedure for trial  
5 unblinding revealing a participant's allocated  
6 intervention during the trial  
7  
8

9 **Methods: Data**  
10 **collection,**  
11 **management, and**  
12 **analysis**  
13  
14

15  
16 Data collection plan [#18a](#) Plans for assessment and collection of 14  
17 outcome, baseline, and other trial data,  
18 including any related processes to promote  
19 data quality (eg, duplicate measurements,  
20 training of assessors) and a description of  
21 study instruments (eg, questionnaires,  
22 laboratory tests) along with their reliability  
23 and validity, if known. Reference to where  
24 data collection forms can be found, if not in  
25 the protocol  
26  
27  
28  
29  
30

31  
32 Data collection [#18b](#) Plans to promote participant retention and 14  
33 plan: retention complete follow-up, including list of any  
34 outcome data to be collected for participants  
35 who discontinue or deviate from intervention  
36 protocols  
37  
38  
39

40 Data management [#19](#) Plans for data entry, coding, security, and 14  
41 storage, including any related processes to  
42 promote data quality (eg, double data entry;  
43 range checks for data values). Reference to  
44 where details of data management procedures  
45 can be found, if not in the protocol  
46  
47  
48  
49

50 Statistics: outcomes [#20a](#) Statistical methods for analysing primary and 14-15  
51 secondary outcomes. Reference to where  
52 other details of the statistical analysis plan  
53 can be found, if not in the protocol  
54  
55

56  
57 Statistics: additional [#20b](#) Methods for any additional analyses (eg, 14-15  
58 analyses subgroup and adjusted analyses)  
59

|    |                      |                      |                                                   |       |
|----|----------------------|----------------------|---------------------------------------------------|-------|
| 1  | Statistics: analysis | <a href="#">#20c</a> | Definition of analysis population relating to     | 14    |
| 2  | population and       |                      | protocol non-adherence (eg, as randomised         |       |
| 3  | missing data         |                      | analysis), and any statistical methods to         |       |
| 4  |                      |                      | handle missing data (eg, multiple imputation)     |       |
| 5  |                      |                      |                                                   |       |
| 6  |                      |                      |                                                   |       |
| 7  |                      |                      |                                                   |       |
| 8  | <b>Methods:</b>      |                      |                                                   |       |
| 9  | <b>Monitoring</b>    |                      |                                                   |       |
| 10 |                      |                      |                                                   |       |
| 11 | Data monitoring:     | <a href="#">#21a</a> | Composition of data monitoring committee          | 15-16 |
| 12 | formal committee     |                      | (DMC); summary of its role and reporting          |       |
| 13 |                      |                      | structure; statement of whether it is             |       |
| 14 |                      |                      | independent from the sponsor and competing        |       |
| 15 |                      |                      | interests; and reference to where further         |       |
| 16 |                      |                      | details about its charter can be found, if not in |       |
| 17 |                      |                      | the protocol. Alternatively, an explanation of    |       |
| 18 |                      |                      | why a DMC is not needed                           |       |
| 19 |                      |                      |                                                   |       |
| 20 |                      |                      |                                                   |       |
| 21 |                      |                      |                                                   |       |
| 22 |                      |                      |                                                   |       |
| 23 |                      |                      |                                                   |       |
| 24 | Data monitoring:     | <a href="#">#21b</a> | Description of any interim analyses and           | 15    |
| 25 | interim analysis     |                      | stopping guidelines, including who will have      |       |
| 26 |                      |                      | access to these interim results and make the      |       |
| 27 |                      |                      | final decision to terminate the trial             |       |
| 28 |                      |                      |                                                   |       |
| 29 |                      |                      |                                                   |       |
| 30 |                      |                      |                                                   |       |
| 31 | Harms                | <a href="#">#22</a>  | Plans for collecting, assessing, reporting, and   | 13    |
| 32 |                      |                      | managing solicited and spontaneously              |       |
| 33 |                      |                      | reported adverse events and other unintended      |       |
| 34 |                      |                      | effects of trial interventions or trial conduct   |       |
| 35 |                      |                      |                                                   |       |
| 36 |                      |                      |                                                   |       |
| 37 |                      |                      |                                                   |       |
| 38 | Auditing             | <a href="#">#23</a>  | Frequency and procedures for auditing trial       | 15-16 |
| 39 |                      |                      | conduct, if any, and whether the process will     |       |
| 40 |                      |                      | be independent from investigators and the         |       |
| 41 |                      |                      | sponsor                                           |       |
| 42 |                      |                      |                                                   |       |
| 43 |                      |                      |                                                   |       |
| 44 |                      |                      |                                                   |       |
| 45 | <b>Ethics and</b>    |                      |                                                   |       |
| 46 | <b>dissemination</b> |                      |                                                   |       |
| 47 |                      |                      |                                                   |       |
| 48 |                      |                      |                                                   |       |
| 49 | Research ethics      | <a href="#">#24</a>  | Plans for seeking research ethics committee /     | 17    |
| 50 | approval             |                      | institutional review board (REC / IRB)            |       |
| 51 |                      |                      | approval                                          |       |
| 52 |                      |                      |                                                   |       |
| 53 |                      |                      |                                                   |       |
| 54 | Protocol             | <a href="#">#25</a>  | Plans for communicating important protocol        | 17    |
| 55 | amendments           |                      | modifications (eg, changes to eligibility         |       |
| 56 |                      |                      | criteria, outcomes, analyses) to relevant         |       |
| 57 |                      |                      | parties (eg, investigators, REC / IRBs, trial     |       |
| 58 |                      |                      |                                                   |       |
| 59 |                      |                      |                                                   |       |
| 60 |                      |                      |                                                   |       |

|    |                       |                                                                      |                                     |
|----|-----------------------|----------------------------------------------------------------------|-------------------------------------|
| 1  |                       | participants, trial registries, journals,                            |                                     |
| 2  |                       | regulators)                                                          |                                     |
| 3  |                       |                                                                      |                                     |
| 4  | Consent or assent     | <a href="#">#26a</a> Who will obtain informed consent or assent      | 17                                  |
| 5  |                       | from potential trial participants or authorised                      |                                     |
| 6  |                       | surrogates, and how (see Item 32)                                    |                                     |
| 7  |                       |                                                                      |                                     |
| 8  |                       |                                                                      |                                     |
| 9  | Consent or assent:    | <a href="#">#26b</a> Additional consent provisions for collection    | n/a - no additional collection of   |
| 10 | ancillary studies     | and use of participant data and biological                           | biological specimens is stipulated  |
| 11 |                       | specimens in ancillary studies, if applicable                        | as part of this observational study |
| 12 |                       |                                                                      |                                     |
| 13 |                       |                                                                      |                                     |
| 14 | Confidentiality       | <a href="#">#27</a> How personal information about potential         | 14                                  |
| 15 |                       | and enrolled participants will be collected,                         |                                     |
| 16 |                       | shared, and maintained in order to protect                           |                                     |
| 17 |                       | confidentiality before, during, and after the                        |                                     |
| 18 |                       | trial                                                                |                                     |
| 19 |                       |                                                                      |                                     |
| 20 |                       |                                                                      |                                     |
| 21 |                       |                                                                      |                                     |
| 22 |                       |                                                                      |                                     |
| 23 | Declaration of        | <a href="#">#28</a> Financial and other competing interests for      | 18                                  |
| 24 | interests             | principal investigators for the overall trial and                    |                                     |
| 25 |                       | each study site                                                      |                                     |
| 26 |                       |                                                                      |                                     |
| 27 |                       |                                                                      |                                     |
| 28 | Data access           | <a href="#">#29</a> Statement of who will have access to the final   | 14                                  |
| 29 |                       | trial dataset, and disclosure of contractual                         |                                     |
| 30 |                       | agreements that limit such access for                                |                                     |
| 31 |                       | investigators                                                        |                                     |
| 32 |                       |                                                                      |                                     |
| 33 |                       |                                                                      |                                     |
| 34 |                       |                                                                      |                                     |
| 35 | Ancillary and post    | <a href="#">#30</a> Provisions, if any, for ancillary and post-trial | n/a - given the observational       |
| 36 | trial care            | care, and for compensation to those who                              | nature of this study and            |
| 37 |                       | suffer harm from trial participation                                 | implementation of ERAS as           |
| 38 |                       |                                                                      | standard of care, any adverse       |
| 39 |                       |                                                                      | clinical outcomes are deemed        |
| 40 |                       |                                                                      | expected as part of the course of   |
| 41 |                       |                                                                      | treatment and not the study itself  |
| 42 |                       |                                                                      |                                     |
| 43 |                       |                                                                      |                                     |
| 44 |                       |                                                                      |                                     |
| 45 |                       |                                                                      |                                     |
| 46 | Dissemination         | <a href="#">#31a</a> Plans for investigators and sponsor to          | 17                                  |
| 47 | policy: trial results | communicate trial results to participants,                           |                                     |
| 48 |                       | healthcare professionals, the public, and other                      |                                     |
| 49 |                       | relevant groups (eg, via publication, reporting                      |                                     |
| 50 |                       | in results databases, or other data sharing                          |                                     |
| 51 |                       | arrangements), including any publication                             |                                     |
| 52 |                       | restrictions                                                         |                                     |
| 53 |                       |                                                                      |                                     |
| 54 |                       |                                                                      |                                     |
| 55 |                       |                                                                      |                                     |
| 56 |                       |                                                                      |                                     |
| 57 | Dissemination         | <a href="#">#31b</a> Authorship eligibility guidelines and any       | 17                                  |
| 58 |                       |                                                                      |                                     |
| 59 |                       |                                                                      |                                     |
| 60 |                       |                                                                      |                                     |

|   |                      |                      |                                                  |                                    |
|---|----------------------|----------------------|--------------------------------------------------|------------------------------------|
| 1 | policy: authorship   |                      | intended use of professional writers             |                                    |
| 2 | Dissemination        | <a href="#">#31c</a> | Plans, if any, for granting public access to the | n/a - there are currently no plans |
| 3 | policy: reproducible |                      | full protocol, participant-level dataset, and    | for public sharing of the data set |
| 4 | research             |                      | statistical code                                 |                                    |

## 8 Appendices

|    |                  |                     |                                                   |                                     |
|----|------------------|---------------------|---------------------------------------------------|-------------------------------------|
| 9  |                  |                     |                                                   |                                     |
| 10 | Informed consent | <a href="#">#32</a> | Model consent form and other related              | 17                                  |
| 11 | materials        |                     | documentation given to participants and           |                                     |
| 12 |                  |                     | authorised surrogates                             |                                     |
| 13 |                  |                     |                                                   |                                     |
| 14 |                  |                     |                                                   |                                     |
| 15 | Biological       | <a href="#">#33</a> | Plans for collection, laboratory evaluation,      | n/a - none are collected as part of |
| 16 | specimens        |                     | and storage of biological specimens for           | the study                           |
| 17 |                  |                     | genetic or molecular analysis in the current      |                                     |
| 18 |                  |                     | trial and for future use in ancillary studies, if |                                     |
| 19 |                  |                     | applicable                                        |                                     |
| 20 |                  |                     |                                                   |                                     |
| 21 |                  |                     |                                                   |                                     |
| 22 |                  |                     |                                                   |                                     |

### 24 Notes:

- 25
  - 26 • 2b: n/a - these are all listed on the [clinicaltrials.gov](http://clinicaltrials.gov) website
  - 27
  - 28 • 5b: n/a - this is an investigator-initiated study
  - 29
  - 30
  - 31 • 11d: n/a - this is an observational study
  - 32
  - 33 • 16a: n/a - not a randomized controlled trial
  - 34
  - 35 • 16b: n/a - not a randomized controlled trial
  - 36
  - 37 • 16c: n/a - not a randomized controlled trial
  - 38
  - 39 • 17a: n/a - not a randomized controlled trial
  - 40
  - 41 • 17b: n/a - not a randomized controlled trial
  - 42
  - 43
  - 44 • 26b: n/a - no additional collection of biological specimens is stipulated as part of this observational study
  - 45
  - 46 • 30: n/a - given the observational nature of this study and implementation of ERAS as standard of care, any
  - 47
  - 48
  - 49
  - 50
  - 51 • 31c: n/a - there are currently no plans for public sharing of the data set
  - 52
  - 53 • 33: n/a - none are collected as part of the study The SPIRIT checklist is distributed under the terms of the
  - 54
  - 55
  - 56
  - 57
  - 58
  - 59
  - 60
- 56 using <https://www.goodreports.org/>, a tool made by the [EQUATOR Network](#) in collaboration with
- 57 [Penelope.ai](#)
