# Supplementary material for: Design and development of the Pediatric Urology Recovery After Surgery Endeavor (PURSUE) multicentre pilot and exploratory study
Source: HighWire-hosted journal article supplement (doi:10.1136/bmjopen-2020-039035), 2020-11-01
Supplement: bmjopen-2020-039035supp001_data_supplement.pdf [file bmjopen-2020-039035supp001_data_supplement.pdf]

## COMIRB Assent

COMIRB  
APPROVED  
26-Oct-2018**COMIRB #:** 17-1176**Person in Charge of the Study:** Kyle Rove, MD**Version Date:** September 2018**Assent Form for: Multicenter Pilot and Exploration Study of Enhanced Recovery After Surgery (ERAS) in Patients Undergoing Urologic Reconstructive Surgery****What is this study about?**

I am being asked if I want to be in this research study. The goal of this study is to find out more about how we can speed up recovery after your surgery.

**Why are you asking me?**

I am being asked to be in the study because I am going to have surgery in my abdomen.

**What Do I Have to Do or What Will Happen to Me?**

If I am in the study, the researchers will collect information about my surgery, recovery and pain levels for a year after my hospitalization. I will be asked to answer a short survey once before and again after surgery.

This study does not involve anything that might hurt or upset me. The questionnaire I will complete will ask about my school and about how I am doing before and after surgery.

**Can I ask Questions?**

I asked any questions I have now about the study. All my questions were answered.

I know that if I have a question later, I can ask and get an answer. If I want to, I can call Dr Rove at 720-777-5839.

**Do I Have to Do This?**

I know that I do not have to be in this study. No one will be mad at me if I say no.

I want to be in the study at this time.  yes  no

I will get a copy of this form to keep.

*Child's Printed Name:* \_\_\_\_\_

*Child's Signature:* \_\_\_\_\_

*Date:* \_\_\_\_\_

*I have explained the research at a level that is understandable by the child and believe that the child understands what is expected during this study.*

*Signature of Person Obtaining Assent:* \_\_\_\_\_ *Date:* \_\_\_\_\_

17-1176 Assent  
Rove  
v.9.2018

Page 1 of 1

Initials \_\_\_\_\_
